# Supplementary material for: Reconciling the total carbon budget for boreal forest wildfire emissions using airborne observations
Source: Copernicus journal article supplement (doi:10.5194/acp-2022-245), 2022-04-14
Supplement: Supplementary file 3 [file acp-2022-245-supplement-version2.zip]

## Supplementary Information

Reconciling the total carbon budget for boreal forest wildfire emissions using airborne observations

Katherine L. Hayden<sup>1\*</sup>, Shao-Meng Li<sup>2</sup>, John Liggio<sup>1</sup>, Michael J. Wheeler<sup>1</sup>, Jeremy J.B. Wentzell<sup>1</sup>, Amy Leithead<sup>1</sup>, Peter Brickell<sup>1</sup>, Richard L. Mittermeier<sup>1</sup>, Zachary Oldham<sup>1,6</sup>, Cris Mihele<sup>1</sup>, Ralf M. Staebler<sup>1</sup>, Samar G. Moussa<sup>1</sup>, Andrea Darlington<sup>1</sup>, Mengistu Wolde<sup>3</sup>, Daniel Thompson<sup>4</sup>, Jack Chen<sup>1</sup>, Debora Griffin<sup>1</sup>, Ellen Eckert<sup>1</sup>, Jenna C. Ditto<sup>5</sup>, Megan He<sup>5</sup> and Drew R. Gentner<sup>5</sup>

[1]{Air Quality Research Division, Environment Canada, Toronto, ON, Canada}

[2]{College of Environmental Sciences and Engineering, Peking University, Beijing, China}

[3]{National Research Council of Canada, Ottawa, ON, Canada}

[4]{Canadian Forest Service, Natural Resources Canada, Edmonton, ON, Canada}

[5]{Yale University, New Haven, CT, USA}

[6]{University of Waterloo, Waterloo, ON, Canada}

\*Correspondence to: Katherine Hayden (katherine.hayden@ec.gc.ca)

## 12.0 Methods

### 12.1 Aircraft measurements

Table S1 provides a summary of the measurements with associated instrumentation, technical details and related references.

#### 12.1.1 Trace gas measurements

All of the trace gas instrumentation except NH<sub>3</sub> and the CIMS were sampled through PTFE tubing from a main aircraft roof hatch that contained multiple inlet ports through which rear-facing tubing was mounted.

The rear-facing inlet minimizes the sampling of particles.

~~NO, NO<sub>2</sub>, NO<sub>y</sub>, SO<sub>2</sub> and GEM These measurements were made using modified commercial instruments~~

~~(Thermo Scientific Inc. and Tekran Instruments Corp.).~~ NO and SO<sub>2</sub> were directly measured: NO by

chemiluminescence with excess ozone using a 42i TL instrument operated in single mode, while SO<sub>2</sub> was measured by pulsed fluorescence with a 43i TL instrument. A photolytic converter (Air Quality Design Inc.) was used to selectively convert a large fraction of NO<sub>2</sub> to NO. The sum of this NO<sub>2</sub> fraction that was converted to NO plus ambient NO, defined as NO<sub>c</sub>, was measured by a second 42i TL chemiluminescent instrument and then NO<sub>2</sub> was calculated based on NO<sub>c</sub>, NO and the efficiency of the photolytic converter. NO<sub>y</sub> was measured by using an external molybdenum converter heated at 325 °C and placed as close as possible to the sampling point, followed by a third 42i TL instrument. NO and SO<sub>2</sub> calibrations were conducted by generating mixing ratios of 0-100 ppbv using NIST certified cylinders from Scott-Marin (10.3 ppmv accuracy: +/- 2 %), an Environics (Model 6100 Multi-Gas Calibrator), and a Sabio Zero Generator (Model 1001). The efficiencies of the photolytic and NO<sub>y</sub> converters were determined using the gas phase titration option of the Environics calibrator. ~~Gas-phase elemental Hg (GEM) was measured with a Tekran 237X instrument (Tekran Instruments Corporation) modified to allow a reduced sampling time of 2 min (McLagan et al., 2021; Cole et al., 2014).~~ Calibrations were conducted periodically throughout the measurement study using NIST-certified standards. Instrument zeros were performed for these instruments 3-5 times per flight for a duration of ~3-5 minutes each time at the beginning, during and after each flight.

**NH<sub>3</sub>** Ammonia (NH<sub>3</sub>) ~~measurements were conducted using Los Gatos Research's (LGR's) NH<sub>3</sub>/H<sub>2</sub>S Analyzer (Model 911-0039)~~ was sampled through an unfiltered inlet, critical orifice and 4 m of 6.35 mm (1/4") outer diameter Sulfinert-coated tubing heated to 90 °C to minimize NH<sub>3</sub> losses to the tubing walls. The flow rate was 2.5 LPM, controlled through a critical orifice near the unfiltered inlet with the pressure in the fluoropel-coated LGR cell being maintained at 100 Torr. For instrument zeros, ambient air was passed through a Teflon filter coated with citric acid. Calibrations were performed using a certified ammonia standard (Air Liquide; 10.0 ppm NH<sub>3</sub> in N<sub>2</sub>, accuracy: +/- 5 %), diluted to near-ambient levels.

**CO, CO<sub>2</sub>, CH<sub>4</sub>, TC and NMOG<sub>f</sub>** CO, CO<sub>2</sub>, CH<sub>4</sub> were measured with a Cavity Ring Down (CRD) spectroscopy instrument (Picarro G2401-m).

**TC and NMOG<sub>T</sub>** A second Picarro G2401-m instrument was used to measure total carbon (TC, in units of ppm<sub>v</sub> C) by passing the sample air through a heated (650 °C) platinum catalyst (Shimadzu), adapted from Stockwell et al. (2018) and Veres et al., (2010) which converted all carbon species to CO<sub>2</sub>. Approximately 4 g of platinum catalyst ([https://www.elementalmicroanalysis.com/product\\_details.php?product=B1605&description=High%20Sensitivity%20Catalyst%20630-00996](https://www.elementalmicroanalysis.com/product_details.php?product=B1605&description=High%20Sensitivity%20Catalyst%20630-00996)) was enclosed in a resistively heated ½” O.D. x 12” long stainless steel tube. As the catalyst assembly was mounted on the roof exterior to the aircraft, with no unheated portion of inlet, TC losses were expected to be negligible. NMOG<sub>T</sub> mixing ratios in units of ppm<sub>v</sub> C were quantified by subtracting the ambient CH<sub>4</sub>, CO and CO<sub>2</sub> measurements (instrument without the upstream-catalyst) from the TC measurements (Fig. S2). Calibrations using two different mixing ratio standards of CO, CO<sub>2</sub> and CH<sub>4</sub>, traceable to NOAA GMD standards,- were performed for both Picarro instruments during flight (at the beginning and end) of each flight to assess instrument drift and sensitivity. No significant drift was observed during each flight. NMOG<sub>T</sub> was averaged to 10 sec (from the 2 sec native time resolution) to increase the signal to noise ratio. The uncertainty of each instrument was assessed in flight by overflowing the inlet with a constant flow of calibration gas or an ultra pure nitrogen gas stripped of CO<sub>2</sub> via two NaOH pellet traps in series (<https://www.sigmaaldrich.com/CA/en/product/supelco/503215>). In both cases, this resulted in an uncertainty of approximately 60 ppbv C at the 3σ level for each TC channel (dominated by the precision of the CO<sub>2</sub> measurement) (Fig. S2). These uncertainties were added in quadrature resulting in a 3σ uncertainty of ±85 ppb C for NMOG<sub>T</sub>. Laboratory experiments indicated that the conversion efficiency of ethane across the catalyst was ~100 %, which is expected to be the most challenging species to combust aside from methane, which is concurrently measured. Additional laboratory experiments using a range of hydrocarbons (>C<sub>2</sub>) including aromatics also exhibited ~100 % conversion efficiency (Li et al., 2021; Li et al., 2019). The catalyst material was changed after approximately every 5 flights to further ensure minimal changes in efficiency.

**CIMS** The CIMS (~~modified Tofwerk/Aerodyne Api-ToF~~) instrument sampled from an insulated rear-facing inlet (PFA, 3/8" OD, 1/4" ID) at 7 LPM (0°C, 1 atm). The instrument was operated using iodide as a reagent ion. The mass resolution at an internal standard peak ( $^{13}\text{CC}_2\text{H}_6\text{O}_2\text{I}^-$ ) was ~5400 Th/Th. The reagent ion was generated by passing 2 sLpm (0°C, 1 atm) of UHP  $\text{N}_2$  over a methyl iodide permeation tube held at 40 °C. This flow was then passed through a Polonium-210 ionizer (NRD P-2031) into the ion molecule reactor (IMR). A flow of humidified  $\text{N}_2$  (20 sccm through a stainless steel bubbler) was also added to the IMR in order to keep the ratio of  $\text{I}(\text{H}_2\text{O})/\text{I}^-$  as constant as possible. The IMR and small segmented quadrupoles (SSQ) were pressure controlled to 70 and 1.5 mBar respectively using Alicat pressure controllers (PC-EXTSEN). Instrument zeros were performed every 15 min by flooding the inlet with 10 sLpm (0°C, 1 atm) of air that had been passed through a Pt/Pd catalyst (CD Nova) heated to 350 °C followed by bicarbonate and charcoal scrubbers (United Filtration). A flow (50 sccm) of isotopically labelled propanoic acid ( $^{13}\text{CC}_2\text{H}_6\text{O}_2$ ) was constantly added to the inlet during the campaign to track instrument sensitivity. Compounds were identified using known/expected sensitivities and available calibration standards (Tables S3).

**PTRMS** The PTR-ToF-MS (~~Ionicon Analytik GmbH, Austria~~) ~~used chemical ionization with  $\text{H}_3\text{O}^+$  as the primary reagent ion was operated~~ in a configuration described previously (Table S1). Gases with a proton affinity greater than that of water were protonated in the drift tube. The pressure and temperature of the drift tube region were maintained at a constant 2.15 mbar and 60 °C, respectively for an E/N of 141 Td. The unit contained a catalytic converter heated to 350 °C with a continuous flow of ambient air at a flow rate of one litre per minute. A permeation tube with 1,2,4-trichlorobenzene was placed at the inlet to improve the ~~sensitivity-accuracy~~ of the mass calibration for higher masses. Instrumental backgrounds were performed in flight using a custom-built zero-air generating unit. The data were processed using Tofware software (Tofwerk AG). Calibrations were performed on the ground using gas standard mixtures from Ionicon, Apel-Reimer and Scott-Marrin for 20 compounds (Table S3). ~~For compounds with no available gas standard, a relative response factor was calculated with reaction rate constants using the method described in Sekimoto et al. (2017) and guided by the work of Koss et al. (2018) to define an~~

~~additional 169 ions.~~ Compound identifications for molecular formulas for the PTRMS and CIMS data were assigned based on a limited set of possibilities (particularly for the smaller compounds), known or expected compound sensitivities, and previously published laboratory work by Koss et al. (2018); this is more fully described in the SI Sect. 2.1.3.

**AWAS** The Advanced Whole Air Sampler (AWAS) was used to ~~take 20-30 sec integrated 'grab' collect~~ **ambient** samples using 1.33-litre electropolished stainless steel canisters in rack-mounted arrays of 12-canister modules (Lerner et al., 2017, and references therein). A metal bellows compressor (Senior Aerospace Metal Bellows, MB-158) was used to pressurize canisters to approximately 30 PSI over a period of approximately ~~15 sec (30 sec maximum)~~ **20 to 30 sec**. Sample lines and manifold tubing were continually flushed with ambient air during the flights. Sampling took place by activating module and pump system valving with custom Labview-based software operating a data logger interface (Labjack Corp., Model T7). The samples were analysed ~~between 5 and 9 days after the flight and cleaned as soon as possible after the flight~~ with an analytical system installed at the Fort McMurray International Airport. The on-site analytical system consisted of a custom fabricated gas chromatograph (GC) system using cryogenic sample pre-concentration, 2-dimensional gas chromatography, Mass Spectrometric Detection (MS) and Flame Ionization Detection (FID). Sample air was cryogenically trapped at -185 °C on a glass bead-filled trap, thus condensing/solidifying the hydrocarbons, and subsequently thermally desorbing them at 135 °C into the multi-column, multi-oven GC/MS/FID instrument. Trapped sample air volumes were calculated by recording pressure differences in a volume-calibrated downstream vacuum vessel before and after sample trapping. Duplicate analysis was carried out on one canister in each AWAS module. The analytical separation of approximately 120 chemical species was carried out by use of a pre-column (SPB-1) where the initial separation of compounds according to boiling point occurred. The low molecular weight compounds (C<sub>2</sub> to C<sub>4</sub>) were then directed to two RTX-QS columns connected in series and quantified by a FID. The higher molecular weight compound stream (C<sub>4</sub> to C<sub>10</sub>) was subsequently split and simultaneously analysed by a second FID connected to an Aluminum Oxide/KCL column (C<sub>4</sub> to C<sub>8</sub>) and by a quadrupole Mass Spectrometer (Agilent Technologies, 5977B) connected to an HP-1 column

by means of a fused silica tubing restrictor ( $C_7$  to  $C_{10}$ ). The precolumn and RTX-QS columns were mounted in the main oven of the gas chromatograph (Agilent Technologies 7890B) and thus were subject to one temperature program. The AlOx/KCL and HP-1 analytical columns were each mounted in a separate temperature-controlled GC oven module (Agilent Technologies, LTM Series II) and operated with a different temperature program. Detector peak areas were calibrated with primary gas standard mixtures in the ppbv concentration range obtained from Apel-Reimer Environmental Inc. (U.S.A.) and the National Physical Laboratory (UK). Compound retention time drift and potential detector sensitivity changes were monitored and compensated for by means of daily analysis of a secondary standard gas. The AWAS modules were cleaned by a custom-fabricated, automated cleaning system similar to that of Lerner et al. (2017). Toluene, benzene and xylenes were not quantified because the method and columns used were not optimized for these compounds. Analytical issues due to incomplete water vapour management in the sample gas stream resulted in retention time shifts and some peak broadening effects resulting in elevated uncertainties. Uncertainties are estimated at  $\pm 25\%$  for  $C_2$  to  $C_5$  and  $C_6$  alkanes detected by FID, and  $\pm 40\%$  for  $C_6$  alkenes, and the  $C_7$  to  $C_{10}$  species detected by MS.

**Cartridges** Integrated gas phase samples were collected using an automated adsorbent tube sampling assembly (i.e. cartridge) that was mounted in an under-wing pod (see Ditto et al., 2021; ~~SI Sect. 2.1.1~~). Adsorbent tubes were packed with quartz wool, glass beads, Tenax TA, and Carboxen 100 (or “QBTX”), similar to those discussed in Sheu et al. (2018). ~~Samples were collected over the lower set of aircraft transects and higher set of transects, resulting in two integrated cartridge samples for each screen; only the lower altitude samples are used in the analysis as the samples for the higher set of transects included a transect that was above the wildfire plume.~~ Samples were shipped to Yale University where offline analysis was conducted using thermal desorption (GERSTEL TD 3.5+) followed by gas chromatography (Agilent 7890B), atmospheric pressure chemical ionization, and high-resolution mass spectrometry (Agilent 6550) to speciate gas-phase organic compounds (Ditto et al., 2021, Sheu et al., 2018, Khare et al., 2019). ~~The samples provided targeted measurements of gas phase compounds ranging in volatility from  $C_{10}$  volatile organic compounds (VOCs) to  $C_{25}$  semivolatile organic compounds (SVOCs) including~~

hydrocarbons ( $\text{CH}_n$ ) as well as functionalized compounds containing 1 oxygen atom ( $\text{CHO}_1$ ), and 1 sulfur atom ( $\text{CHS}_1$ ). Ion abundances for  $\text{CH}_n$ ,  $\text{CHO}_1$ , and  $\text{CHS}_1$  species were converted to mass concentrations assuming average response factors that were calculated based on calibrations using the NIST Reference Gulf of Mexico 2779 Macondo Crude oil reference material following Khare et al. (2019), which accounts for variations in response and fragmentation between components of the complex mixture.  $\text{CHN}_1$  species were not quantitatively converted to mass due to the lack of comprehensive and available authentic standards. ~~We acknowledge the limited sample numbers based on flight design, and that the~~ reported emissions are subject to potential variations in sampling efficiency within the under-wing sampling pod across  $\text{C}_{10}$ - $\text{C}_{25}$  and, in the event of losses due to analyte breakthrough, would likely be considered lower limit estimates. Prior breakthrough testing with QBTX adsorbent tubes and similar sampling conditions to those used in this study showed that analyte trapping efficiency in the same carbon number range was generally greater than 85 % (Sheu et al., 2018).  ~~$\text{CHN}_1$  was not quantitatively converted to mass due to the lack of available standards.~~ For  $\text{CH}_n$ ,  $\text{CHO}_1$ , and  $\text{CHS}_1$ , each group of isomers at a given carbon number was categorized by molecular formula, according to their double bond equivalents (DBE) ranging from 0 to 15. Emission ratios (to in-plume CO) were estimated for  $\text{CH}_n$ ,  $\text{CHO}_1$  and  $\text{CHS}_1$  using observed concentrations for the  $\text{C}_{10}$ - $\text{C}_{25}$  species summed across DBEs. Further discussion of these methods can be found in Ditto et al. (2021), including in the SI (i.e., Section S3).

### 12.1.2 Particle measurements

Particles were sampled from a forward-facing isokinetic stainless steel diffuser inlet (Droplet Measurement Technologies) that was positioned near the top of the fuselage forward of the engine on the starboard side. Theoretical calculations that take into account the inlet dimensions, volume flow and velocity indicated a 97 % transmission efficiency for particles  $< 1 \mu\text{m}$  through the inlet. Air was pulled through the inlet into a main 0.5" O.D. stainless steel sampling line maintained at the isokinetic rate of 70 LPM by two venturis mounted on the fuselage in the aft section of the aircraft. The aerosol instruments subsampled from the main sampling line.

**AMS** The high resolution aerosol mass spectrometer (AMS) (Aerodyne) measures submicron particles that are sampled through a critical orifice and focussed through an aerodynamic lens into a region of low vacuum. The particles impact a heated surface (600 °C), are vapourized and ionized by 70eV impaction. Ions are then transferred to a time-of-flight mass spectrometer (Tofwerk) where they are accelerated by electric fields and separated by their velocities which are dependent on their mass to charge ratios. Ions are then detected by charged microchannel plates. The AMS was operated only in V mode with 10 sec time resolution. Several ionization efficiency calibrations performed prior to and during the field campaign varied by <10 %. To determine the AMS collection efficiency, number concentrations measured by an Ultra High Sensitivity Aerosol Spectrometer (UHSAS; Droplet Measurement Technologies Inc.) over a size range of 60 nm to 1 µm were converted to volume concentrations using mid-point bin diameters and assuming spherical shapes. ~~Volume concentrations were converted to mass concentrations using densities weighted by the AMS chemical components~~ Total mass was calculated from the UHSAS measurements based on the composition-weighted proportional density determined from the AMS. A collection efficiency of 0.5 was determined. Detailed investigations and discussions around the collection efficiency of the AMS can be found in the literature (Middlebrook et al., 2012; Dunlea et al., 2009; Kleinman et al., 2008; Drewnick et al., 2004; Quinn et al., 2006). PM<sub>1</sub> is the sum of the mass concentrations of AMS components (OA, NO<sub>3</sub>, SO<sub>4</sub> and NH<sub>4</sub>). ~~The PM<sub>1</sub> from this study is compared with the For comparisons of PM<sub>1</sub> from this study and PM<sub>2.5</sub> EFs from the Andreae (2019) literature review of boreal forest wildfire studies. While these measurements represent PM over different size ranges (< 1µm vs <2.5µm), the difference is not expected to be significant based on typical size distributions of wildfire emissions (Andreae 2019; Reid and Hobbs, 1998; Reid et al., 2005). This approach has been used previously in literature reviews of EFs for wildfire emissions (Andreae 2019; Akagi et al., 2011). other studies, the mass was estimated between 1 and 2.5 µm to assess the extent of which this might be influencing such comparisons. Using estimated particle mass concentrations from a Fast Cloud Droplet Probe (FCDP) (<2.5 µm) and those from a UHSAS (<1 µm), there is an estimated 10 % of aerosol mass between 1 and 2.5 µm.~~



BC The SP2 (~~Droplet Measurement Technologies~~) measures the mass of rBC contained in individual aerosols through the laser-induced incandescence of heated rBC-containing aerosols (Stephens et al., 2003; Baumgardner et al., 2004; Schwarz et al., 2006). The SP2 was calibrated using fullerene soot (Alpha Aesar lot# F12S011) (Moteki and Kondo, 2010; Kondo et al., 2011; Laborde et al., 2012) nebulized from a water suspension and passed through an aerosol particle mass analyzer (Kanomax APM3600) to select particles with masses ranging from 0.2 fg/particle to 48 fg/particle. Extremely large particles containing more than 520 fg of rBC were excluded from analysis due to saturation of the detector (these accounted for only  $2 \times 10^{-3}$  % of the total number of rBC containing particles measured by the SP2).

UHSAS Particle size distributions were measured using an Ultra-High Sensitivity Aerosol Spectrometer (~~UHSAS; Droplet Measurement Technologies~~). The UHSAS measures the size of individual aerosols passing through a laser beam via Mie scattering (Cai et al., 2008; Kupc et al., 2018). These particles are classified into 99 log-normally spaced bins across the measurement range. Periods where the particle concentration measured by the UHSAS exceeded 3000 particles  $s^{-1}$  were excluded from this analysis due to the potential of coincident particles passing through the laser beam. The UHSAS particle sizing was verified using NIST traceable polystyrene latex (PSL) nanospheres of multiple sizes across the measurement range. Total particle mass was calculated from the UHSAS measurements assuming a density of  $1.2 \text{ g cm}^{-3}$ , based on the ~~composition-weighted~~ proportional density determined from the AMS.

### 12.1.3 Identification of organic compounds

Three methods were used to provide detailed measurements of gas-phase organic compounds that included the PTRMS, CIMS, and canister samples (AWAS). The PTRMS and CIMS are able to resolve the molecular formula of isobaric species, but cannot distinguish isomers, while the AWAS system can identify and speciate individual compounds. For the PTRMS measurements, compound molecular formulae were assigned based on a limited set of possibilities (particularly for the smaller compounds), known or expected compound sensitivities, and comparing with previously published laboratory work by

Koss et al. (2018) based on typical NMOG structures observed in biomass burning emissions. Koss et al. (2018) used a combination of gas-chromatography (GC) pre-separation,  $\text{NO}^+$  CIMS and time series correlations to identify 156 compounds measured in biomass burning laboratory experiments with a PTRMS. Additional comparisons were made with PTRMS ion masses reported in Permar et al. (2021) where they used a PTRMS with two GC methods to speciate isomers for some PTRMS ion masses. For formulas with multiple isomer contributions that were not speciated by the PTRMS, or provided by the AWAS, the fractional contributions in Koss et al. (2018) and Permar et al. (2021) were used to identify the dominant ion and/or contributing compounds. Although the Koss et al. (2018) work was based on laboratory measurements, Permar et al. (2021) found that isomer contributions did not vary much between 24 fires types across the WE-CAN airborne field campaign in western US, which were mainly dominated by fires of pine, fir and spruce trees. For example, in Koss et al. (2018), for the mass spectral ion of  $\text{C}_3\text{H}_6\text{O}$  ( $m/z$  58.08), the contribution from acetone was set at 100 % and propanal 0 %, only slightly different from the contribution of  $83 \pm 6$  % for acetone determined by Permar et al., 2021; thus this compound was identified as acetone in this work. Another example is  $\text{C}_4\text{H}_8\text{O}$  at  $m/z$  70.091 that has potential contributions from methyl vinyl ketone (MVK), methacrolein and crotonaldehyde, both Koss et al. (2018) and Permar et al. (2021) both reported that MVK is the largest contributor at 48 % and  $60 \pm 9$  % respectively; the compound was labelled here as all three. For  $\text{C}_8\text{H}_{10}$  ( $m/z$  106.168), there are contributions from ethyl-benzene, m- and p-xylenes and o-xylene identified as 10%, 68% and 23%, respectively (Koss et al., 2018), with slightly different isomer contributions as per Permar et al. (2021). In this study, as it was not possible to speciate  $\text{C}_8\text{H}_{10}$  with the AWAS system, it is simply identified as C8 aromatics. Similarly,  $\text{C}_{10}\text{H}_{16}$ , ( $m/z$  136.238) is identified as total monoterpenes in the present study, with expected contributions from multiple species including alpha and beta pinene, camphene, myrcene, and tricyclene (Permar et al., 2021; Hatch et al., 2017).  $\text{C}_5\text{H}_8$  at  $m/z$  68.119 was identified as isoprene in the present study, recognizing that there may be a fractional contribution to this mass from methyl-3-buten-2-ol (MBO), although Permar et al. (2021), suggests that MBO may not be significant, based on their analysis of western US wildfires.

For the CIMS, the iodide reagent ion chemistry is most sensitive to polar compounds, particularly carboxylic acids and less sensitive to non-polar compounds (Table S1). Compounds were identified using these known/expected sensitivities and available calibration standards. The AWAS provided speciated measurements of hydrocarbons ( $\leq C_{10}$ ), and no oxygenates.

**12.1.4 Overlapping compounds** There were a number of compounds (or molecular formulae) that were measured by both the PTRMS and the AWAS, as well as compounds that overlapped between the PTRMS and CIMS. Tables S4 and S5 summarize the decisions of overlapping compounds that were retained for derivation of EFs and  $\Delta$ ERs, as well as for the carbon/nitrogen budget analyses. For the PTRMS and AWAS, for some molecular formulae, the AWAS provided measurements of individual isomers, while the corresponding PTRMS measurement was expected to reflect ~~the sum of these~~ ~~quantity of the~~ sum of multiple isomers. Comparisons between these two methods are challenging due to the influence of isomers in the PTRMS signal, and the fact that a number of the PTRMS compounds are determined using calculated sensitivities (i.e. not directly calibrated with a standard) with estimated uncertainties of 50 %. These factors limit a comparison between the AWAS and PTRMS for isoprene ( $C_5H_8$ ) which is shown in Fig. S3a. The comparison for Screens 1 through 3 shows good agreement with an  $r^2=0.87$ . When including only Screen 1 data, there are two data points (in the SP) where the PTRMS is a factor of 2.5 to 3 higher than the AWAS, resulting in a lower  $r^2=0.45$ . Although the PTRMS isoprene signal is known to have interferences from cycloalkanes, these compounds are not expected to be emitted from wildfires. 2-methyl-3-buten-2-ol (MBO) produces a fragment at  $m/z$  69.070 that is not separated in the PTRMS, and can also interfere with the isoprene measurement. We do not have measurements to confirm the impact of MBO on the isoprene signal. However, Permar et al. (2021) reported that PTRMS derived isoprene measurements during their study were approximately 2x higher than the AWAS isoprene while sampling smoke, but MBO which was measured during that study was considered too low to account for the higher than expected isoprene. In the present study, it is possible that there were contributions from other unknown isomers to the PTRMS signal in the fresh smoke plumes along Screen

1. Due to these uncertainties, and the comparatively fewer in-plume AWAS samples, EFs and ERs for isoprene are reported from both the PTRMS and AWAS, and isoprene from the PTRMS was used in the carbon budget (Table S4).

In deriving EFs and ~~NERs~~, both the PTRMS and AWAS measurements were included to retain as much information as possible. To avoid double-counting compounds in the carbon and nitrogen budget analyses, only the PTRMS measurement was typically included as it is expected to reflect a sum of ~~all~~ multiple isomers, thus, accounting for more carbon. For example, at the molecular formulas of C<sub>5</sub>H<sub>10</sub>, the PTRMS measurements are expected to reflect the sum of all the isomers, whereas ~~5-7~~ compounds were speciated from the AWAS i.e. c-2-pentene, cyclopentane, 1-pentene, 2-me-1-butene, 3-methyl-1-butene, t-2 pentene, and 2-me-2-butene. In this case, EFs and ~~NERs~~ were derived for both the PTRMS and AWAS measurements, but only the PTRMS measurements were included in the budget analyses.

Between the PTRMS and CIMS, there were 18 overlapping molecular formulae. Although comparisons of exact masses between the PTRMS and CIMS are complicated because of the influence of isomers in the PTRMS signal, four exact masses of which ~~4~~ were identified as the same compound including acetic acid, acrylic acid, formic acid, and isocyanic acid. Figure S3 shows a comparison for the first three compounds, but excludes isocyanic acid as this compound can hydrolyze in the PTRMS drift tube. The CIMS provided measurements of pyruvic acid, but the PTRMS signal at the same mass is likely affected by inlet line losses. Acetic acid and acrylic acid show good agreement with  $r^2 > 0.8$  with the PTRMS in-plume measurements ~20 % higher than the CIMS (Fig. S3a, b); this is likely due to additional contributions to the PTRMS signal at these respective exact masses. The comparison for formic acid (Fig. S3c) is poor ( $r^2 = 0.3$ ) likely because the PTRMS measurements are noisy and have a high detection limit of 2 ppbv, whereas the CIMS detection limit is 0.097 ppbv. The CIMS measurements were also directly calibrated (Table S2), whereas the PTRMS formic acid sensitivity (and other compounds) were calculated, and as such, the CIMS measurements for the overlapping compounds were retained for analysis ~~f~~(Table S5). ~~or 3 of these 4 compounds (Table S5) because they were directly calibrated (Table S2), whereas the PTRMS compounds were calculated. For the 4<sup>th</sup> compound (acetic~~

acid), EFs for both instruments were reported, but only the CIMS data for acetic acid were included in the carbon budget analyses; EFs were very similar (Table A1). The remaining overlapping formulae between the CIMS and PTRMS were calibrated with different analytes, and thus assumed to be different species. While there may in fact be some overlap between isomers contributing to these formulae, their overall contribution to the TC budget is small (<4 %). An attempt was made to quantify as many other peaks that were present in the CIMS mass spectra as possible and apply sensitivity factors. However, the available sensitivity factors were based on laboratory experiments investigating anthropogenic emissions and highly uncertain for biomass burning measurements. Nevertheless, application of these sensitivity factors resulted in average mass from the CIMS spectra totalling < 1.5 % of the TC, so although uncertain, exclusion of these masses is not expected to significantly influence the total carbon budget. It is assumed that all the acids measured by the CIMS are non-aromatic for classifying into chemical structural categories.

## **1.2 Mass balance method for estimating aircraft-derived emission rates**

The Topdown Emission Rate Retrieval Algorithm (TERRA) was designed to estimate emission rates of pollutants measured by aircraft. The algorithm is based on the Divergence Theorem to achieve mass balance and been extensively applied to a range of pollutants measured by aircraft (e.g. Hayden et al., 2021; Baray et al., 2018; Li et al., 2017; Liggio et al., 2017; Gordon et al., 2015). An extension of TERRA previously used for estimating pollutant mass transfer rates across virtual aircraft screens (e.g. Hayden et al., 2021; Baray et al., 2018) was used in the present study to estimate emission rates of NO<sub>x</sub>, CO, PM<sub>1</sub> and NH<sub>3</sub> using Screen 1 data. Briefly, pollutant concentrations and horizontal wind speeds were mapped to virtual screens and interpolated using a kriging function, as well as extrapolating the measurements from the lowest aircraft altitude to the surface using applicable extrapolation profiles. Mass transfer rates were derived by integration of the horizontal fluxes across the plume on the screen in

units of  $\text{t h}^{-1}$ . The main uncertainty in the mass transfer rate is due to extrapolation to the surface as described previously (e.g. Gordon et al., 2015 and Hayden et al., 2021).

## **2.22.0 Flight and fire description**

The 18BN-Larry fire (the Lac LaLoche fires) was detected by the Saskatchewan wildfire management agency on June 23, 2018. Satellite images showed fire hot spots on June 23 and by the evening of June 23 it grew to 1,250 hectares (ha) and to 2,600 ha on June 24<sup>th</sup>. On the morning of June 25, 2018, there was a very weak nocturnal inversion and moderately strong south to southeast winds at 33 knots above the inversion. The range of fire intensities during the previous night, as well as the observed high humidity (80-90 %) and light to moderate winds observed at the surface also indicates that the fire source at the time of aircraft sampling was in a smoldering combustion state. Flight tracks were flown at Lagrangian distances downwind of the wildfire. Multiple passes (i.e. transects) perpendicular to the plume direction were made at different altitudes. Two plumes were identified: the SP was clearly due to the fire hot spots identified by MODIS (green dots encompassed by a polygon), but the source of the NP is less certain. It is possible that MODIS was unable to detect the fire source because the fire heat signature was below the threshold for satellite instrument detection. However, surface wind measurements at Lac LaLoche (SI Table S1 in McLagan et al., 2021) show that the wind direction was southerly just prior (approx. 30 min) to the start of the aircraft measurements, and then shifted to southeast ( $135 \pm 13^\circ$ ) for the duration of the aircraft flight. Therefore, it is likely that the NP was from the same fire source as the SP that had been transported in a northerly direction just prior to aircraft sampling, and subsequently moved to a northwesterly direction with the wind change. The width of the SP and NP was approximately 14-37 km separated by approximately 8-19 km depending on the sampling altitude, and with an aircraft speed of  $\sim 90 \text{ m s}^{-1}$ , the plumes were traversed in 3-7 min (Fig. 2).

## **~~3 Emission ratios, emission factors and combustion efficiency~~**

### 3.01 Combustion state

The combustion efficiency (CE) can be used to characterize and compare the combustion state of the fire, (i.e. the fraction of fuel carbon converted to atmospheric CO<sub>2</sub>) (Ward and Radke, 1993). The CE is dependent upon many factors including fire combustion state, fuel chemistry, fuel geometry, growth stage, moisture content and meteorological conditions such as wind speed and temperature. In a flaming fire, high temperature reactions tend to go to completion (>90 %) as rapid reaction of O<sub>2</sub> with the fuel C, H, N and S produces highly oxidized gases including CO<sub>2</sub>, NO<sub>x</sub>, and SO<sub>2</sub> and BC. As a fire progresses, incomplete combustion characteristics of smoldering fires becomes more dominant resulting in a larger proportion of the emitted carbon in the form of CO, CH<sub>4</sub>, NMOC, and OA. Airborne measurements tend to sample a mixture of combustion states; however, there tends to be a dominant phase of combustion at different fire stages (Andreae and Merlet, 2001). If only accounting for CO<sub>2</sub> and CO, the MCE for the SP is 0.90±0.01 and NP is 0.88±0.01, higher than the CE by 7.1 % and 6.6 % for the SP and NP, respectively. These differences are driven mostly by the additional contribution from NMOGs indicating the importance of their inclusion in assessing fire combustion state.

Since the flaming phase was likely more than 14 hrs prior to aircraft sampling, it is possible that the emissions from this fire may also reflect a residual smoldering combustion (RSC) component. RSC produces emissions from combustion of forest floor and woody debris that are not associated with flaming, can be sustained for long periods of time after the passage of a flame front, and are not strongly lofted through fire-induced convection (Bertschi et al., 2003). It is noted though that observations of increased levels of flaming compounds in the plumes including CO<sub>2</sub> and BC (Fig. S42) suggest that to some extent, flaming processes also contributed to the release of these compounds. It is likely that different parts of the fire had varying mixtures of smoldering, flaming and residual combustion processes, but the evidence strongly suggests that the Lac LaLoche fire was predominantly in a smoldering combustion state during the aircraft measurement time period. Smoldering fires can create persistent and poorly ventilated smoke that can be a significant driver in remote community evacuations (McGee, 2020).

383 In addition, boreal fires in this region tend to exhibit a large component of smoldering combustion which  
384 can consume large amounts of above and below ground biomass (Akagi et al., 2011).  
385



386 Table S1. Measurements with associated instrument, principle of operation, sampling time resolution,  
 387 **uncertainty, detection limit**, and applicable method references.

| Measurement                                          | Instrument                              | Principle of measurement                                                                   | Time Resolution (sec) | Uncertainty                                                                       | Detection Limit                                                                                                                       | Reference                                         |
|------------------------------------------------------|-----------------------------------------|--------------------------------------------------------------------------------------------|-----------------------|-----------------------------------------------------------------------------------|---------------------------------------------------------------------------------------------------------------------------------------|---------------------------------------------------|
| NO                                                   | Thermo 42i                              | Chemiluminescence with O <sub>3</sub>                                                      | 1                     | ±5 %                                                                              | 3σ at 1 sec 0.17 ppbv                                                                                                                 | Clyne et al., 1964<br>Ridley et al., 1990         |
| NO <sub>2</sub>                                      | Thermo 42i                              | Photolysis + chemiluminescence with O <sub>3</sub>                                         | 1                     | ±7 %                                                                              | 3σ at 1 sec 0.43 ppbv                                                                                                                 | Penkett et al., 2011                              |
| NO <sub>y</sub>                                      | Thermo 42i                              | Heated (350°C) and molybdenum catalyzed conversion + chemiluminescence with O <sub>3</sub> | 1                     | ±5 %                                                                              | 3σ at 1 sec 0.18 ppbv                                                                                                                 | Fehsenfeld et al., 1987;<br>Williams et al., 1998 |
| SO <sub>2</sub>                                      | Thermo 43i                              | UV pulsed fluorescence                                                                     | 1                     | ±5 %                                                                              | 3σ at 1 sec 1.25 ppbv                                                                                                                 | Stecher et al., 1997                              |
| O <sub>3</sub>                                       | Thermo 42i                              | Chemiluminescence                                                                          | 1                     | ±5 %                                                                              | 3σ at 1 sec 0.52 ppbv                                                                                                                 | N/A                                               |
| NH <sub>3</sub>                                      | LGR model 911-0039                      | Absorption                                                                                 | 1                     | ±5 %                                                                              | 2.1 ppbv at 1 sec<br>0.3 ppbv at 60 sec                                                                                               | Leifer et al., 2017                               |
| Hg (GEM)                                             | Tekran 237X                             | Fluorescence                                                                               | 120                   | ±0.054 ng m <sup>-3</sup>                                                         | <0.1 ng m <sup>-3</sup>                                                                                                               | Cole et al., 2014;<br>McLagan et al., 2021        |
| CO, CO <sub>2</sub> , CH <sub>4</sub>                | Picarro G-2401-m                        | Cavity ring down spectrometry                                                              | 2                     | CH <sub>4</sub> ~±3 ppbv                                                          | N/A                                                                                                                                   | Baray et al., 2018                                |
| Total Carbon (TC)                                    | Picarro G-2401-m                        | Heated (650°C) platinum catalyzed conversion to CO <sub>2</sub>                            | 2                     | 3σ at 10 sec ±60 ppbv                                                             | N/A                                                                                                                                   | Stockwell et al., 2018;<br>Veres et al., 2010.    |
| Total non-methane organic gases (NMOG <sub>T</sub> ) | Picarro G-2401-m x 2                    | Difference method, heated (650°C) platinum catalyzed conversion to CO <sub>2</sub>         | 10                    | 3σ at 10 sec ±85 ppbv                                                             | 85 ppbv 3σ at 10 sec                                                                                                                  | Stockwell et al., 2018;<br>Veres et al., 2010     |
| VOCs                                                 | CIMS                                    | Chemical ionization/mass spectrometry                                                      | 1                     | ±10-50% compound dependent                                                        | See Table S2                                                                                                                          | Liggio et al., 2017; Lee et al., 2014             |
| VOCs (≤C <sub>10</sub> )                             | <del>Canister grab samples (AWAS)</del> | Grab samples/GC with MS and FID analysis                                                   | <del>Grab 20-30</del> | <C <sub>6</sub> ±25%<br>≥C <sub>6</sub> ±40-%                                     | 0.7 to 12.9 pptv for compounds from C <sub>2</sub> to C <sub>8</sub> ; 1 to 242 pptv for C <sub>9</sub> and C <sub>10</sub> compounds | N/A                                               |
| VOCs                                                 | PTRMS                                   | Proton transfer/ionization/mass spectrometry                                               | 1                     | VOCs with available standards: ±15% except CH <sub>2</sub> O at- ±20%; Calculated | Range of 0.005 to 1 ppbv, CH <sub>2</sub> O 4.6 ppbv at 1 sec                                                                         | Li et al., 2017;<br>Sekimoto et al., 2017         |

|                                                 |                                                                 |                                                     |                                           |                                                                                        |                                                                                                                                                                                     |                                                                                      |
|-------------------------------------------------|-----------------------------------------------------------------|-----------------------------------------------------|-------------------------------------------|----------------------------------------------------------------------------------------|-------------------------------------------------------------------------------------------------------------------------------------------------------------------------------------|--------------------------------------------------------------------------------------|
|                                                 |                                                                 |                                                     |                                           | VOCs:<br>±50%                                                                          |                                                                                                                                                                                     |                                                                                      |
| VOCs-SVOCs<br>(C10-C25)                         | Custom packed<br>adsorbent tubes                                | Offline analysis with TD-<br>GC-APCI-Q-ToF          | Variable<br>(245-3140<br>sec per<br>tube) |                                                                                        | 1 ppt                                                                                                                                                                               | Sheu et al.,<br>2018; Khare<br>et al., 2019;<br>Ditto et al.,<br>2021                |
| Particle<br>chemical<br>composition             | Aerosol mass<br>spectrometer                                    | Volatilization, ionization<br>and mass spectrometry | 10                                        | OA: ±35%<br>SO <sub>4</sub> : ±25%<br>NO <sub>3</sub> : ±20%<br>NH <sub>4</sub> : ±25% | OA: 0.24 µg m <sup>-3</sup><br>SO <sub>4</sub> : 0.05 µg m <sup>-3</sup><br>NO <sub>3</sub> : 0.035 µg<br>m <sup>-3</sup><br>NH <sub>4</sub> : 0.15 µg m <sup>-3</sup><br>at 10 sec | DeCarlo et<br>al., 2008;<br>Jimenez et<br>al., 2003;<br>Allan et al.,<br>2003        |
| Black carbon                                    | SP2                                                             | Incandescence                                       | 1                                         | 15 %                                                                                   | 0.01 µg m <sup>-3</sup> at 1<br>sec                                                                                                                                                 | Stephens et<br>al., 2003;<br>Baumgardner<br>et al., 2004;<br>Schwarz et<br>al., 2006 |
| Particle size<br>distributions<br>(60 -1000 nm) | Ultra-High<br>Sensitivity<br>Aerosol<br>Spectrometer<br>(UHSAS) | Particle light scattering                           | 1                                         | 10 %                                                                                   |                                                                                                                                                                                     | Cai et al.,<br>2008; Kupc<br>et al., 2018                                            |

Table S2. Standards used to calibrate the CIMS, as well as the compound uncertainty, detection limit and applicable method reference. The iodide chemistry is most sensitive to polar compounds and less sensitive to non-polar compounds. The sensitivity tends to increase for keto-, hydroxy- and acid groups, in order. Most of the keto- groups are attached to a carboxylic acid. For the larger acids (>C4) where there can be several isomers, they are generally identified as saturated C4 carboxylic acids and unsaturated C5 acids.

| Molecular weight | Molecular formula                            | Compound Name        | Calibration standard  | Calibration Source                                           | Uncertainty (%) | Detection Limit (pptv) | Reference            |
|------------------|----------------------------------------------|----------------------|-----------------------|--------------------------------------------------------------|-----------------|------------------------|----------------------|
| 27.026           | HCN                                          | hydrogen cyanide     | Hydrogen Cyanide      | High Pressure Cylinder (Air Liquide)                         | 20              | 17                     | Stockwell et al 2018 |
| 32.06            | SO <sub>2</sub>                              | sulphur dioxide      | Sulfur Dioxide        | High Pressure Cylinder (Air Liquide)                         | N/A             | N/A                    | Lee et al 2018       |
| 43.025           | HNCO                                         | isocyanic acid       | Isocyanic Acid        | Thermal Decomposition/ Diffusion                             | 30              | 10                     | Roberts et al 2010   |
| 46.025           | CH <sub>2</sub> O <sub>2</sub>               | formic acid          | Formic Acid           | Liquid Standard supplied by Liquid Calibration Unit (LCU)    | 20              | 156                    | Mungall et al 2017   |
| 47.013           | HONO                                         | nitrous acid         | Nitrous Acid          | Acid Displacement (output quantified by ion chromatography ) | 30              | 12                     | Roberts et al 2010   |
| 57.052           | C <sub>2</sub> H <sub>3</sub> NO             | hydroxy acetonitrile | Glycolic Acid Nitrile | Liquid Standard supplied by Liquid Calibration Unit (LCU)    | 20              | 0.12                   | Mungall et al 2017   |
| 60.052           | C <sub>2</sub> H <sub>4</sub> O <sub>2</sub> | acetic acid          | Acetic Acid           | Liquid Standard supplied by Liquid Calibration Unit (LCU)    | 20              | 576                    | Mungall et al 2017   |
| 63.012           | HNO <sub>3</sub>                             | nitric acid          | Nitric Acid           | Permeation Tube (output quantified by ion chromatography )   | N/A             | 58                     | Neuman et al 1999    |
| 72.063           | C <sub>3</sub> H <sub>4</sub> O <sub>2</sub> | acrylic acid         | Acrylic Acid          | Liquid Standard supplied by Liquid Calibration Unit (LCU)    | 20              | 17                     | Mungall et al 2017   |
| 74.079           | C <sub>3</sub> H <sub>6</sub> O <sub>2</sub> | propionic acid       | Propionic Acid        | Liquid Standard supplied by Liquid                           | 20              | 55                     | Mungall et al 2017   |

|                    |                                                     |                                                    |                                                         |                                                                                                                                         |                |                 |                               |
|--------------------|-----------------------------------------------------|----------------------------------------------------|---------------------------------------------------------|-----------------------------------------------------------------------------------------------------------------------------------------|----------------|-----------------|-------------------------------|
|                    |                                                     |                                                    |                                                         | Calibration Unit (LCU)                                                                                                                  |                |                 |                               |
| 79.011             | HNO <sub>4</sub>                                    | pernitric acid                                     | Pernitric Acid                                          | Reaction of HO <sub>2</sub> with NO <sub>2</sub> (quantified by thermal decomposition Cavity Ringdown Spectroscopy of NO <sub>2</sub> ) | 50             | 2               | Veres et al 2015              |
| 84.074             | C <sub>4</sub> H <sub>4</sub> O <sub>2</sub>        | <del>C<sub>4</sub>H<sub>4</sub>O<sub>2</sub></del> | 2(5H)-Furanone                                          | Liquid Standard supplied by Liquid Calibration Unit (LCU)                                                                               | 20             | 51              | Mungall et al 2017            |
| <del>85.062</del>  | <del>C<sub>3</sub>H<sub>3</sub>NO<sub>2</sub></del> | <del>cyanoacetic acid</del>                        | <del>Cyanoacetic Acid</del>                             | <del>Liquid Standard supplied by Liquid Calibration Unit (LCU)</del>                                                                    | <del>20</del>  | <del>0.17</del> | <del>Mungall et al 2017</del> |
| <del>86.09</del>   | <del>C<sub>4</sub>H<sub>6</sub>O<sub>2</sub></del>  | <del>methacrylic acid</del>                        | <del>Methacrylic Acid</del>                             | <del>Liquid Standard supplied by Liquid Calibration Unit (LCU)</del>                                                                    | <del>N/A</del> | <del>N/A</del>  | <del>Mungall et al 2017</del> |
| 88.062             | C <sub>3</sub> H <sub>4</sub> O <sub>3</sub>        | pyruvic acid                                       | Pyruvic Acid                                            | Liquid Standard supplied by Liquid Calibration Unit (LCU)                                                                               | 20             | 253             | Mungall et al 2017            |
| <del>88.106</del>  | <del>C<sub>4</sub>H<sub>8</sub>O<sub>2</sub></del>  | <del>C4 saturated carboxylic acids</del>           | <del>Butyric Acid</del>                                 | <del>Liquid Standard supplied by Liquid Calibration Unit (LCU)</del>                                                                    | <del>20</del>  | <del>63</del>   | <del>Mungall et al 2017</del> |
| <del>91.066</del>  | <del>C<sub>2</sub>H<sub>5</sub>NO<sub>3</sub></del> | <del>C2 Nitro alcohol</del>                        | <del>2-Nitroethanol</del>                               | <del>Liquid Standard supplied by Liquid Calibration Unit (LCU)</del>                                                                    | <del>20</del>  | <del>0.80</del> | <del>Mungall et al 2017</del> |
| 100.117            | C <sub>5</sub> H <sub>8</sub> O <sub>2</sub>        | unsaturated C5 carboxylic acids                    | 4-Pentenoic Acid                                        | Liquid Standard supplied by Liquid Calibration Unit (LCU)                                                                               | 20             | 19              | Mungall et al 2017            |
| 102.089            | C <sub>4</sub> H <sub>6</sub> O <sub>3</sub>        | C4 oxo-carboxylic acids                            | 2-Ketobutyric Acid                                      | Liquid Standard supplied by Liquid Calibration Unit (LCU)                                                                               | 20             | 354             | Mungall et al 2017            |
| <del>102.133</del> | <del>C<sub>5</sub>H<sub>10</sub>O<sub>2</sub></del> | <del>C5 saturated carboxylic acids</del>           | <del>Valeric Acid + Isovaleric Acid (equal parts)</del> | <del>Liquid Standard supplied by Liquid</del>                                                                                           | <del>20</del>  | <del>46</del>   | <del>Mungall et al 2017</del> |

|         |                                               |                                                               |                                                     |                                                                                                                                         |    |      |                    |
|---------|-----------------------------------------------|---------------------------------------------------------------|-----------------------------------------------------|-----------------------------------------------------------------------------------------------------------------------------------------|----|------|--------------------|
|         |                                               |                                                               |                                                     | Calibration Unit (LCU)                                                                                                                  |    |      |                    |
| 104.105 | C <sub>4</sub> H <sub>8</sub> O <sub>3</sub>  | C4-hydroxy-carboxylic acids                                   | 3-Hydroxybutyric Acid                               | Liquid Standard supplied by Liquid Calibration Unit (LCU)                                                                               | 20 | 4    | Mungall et al 2017 |
| 108.009 | N <sub>2</sub> O <sub>5</sub>                 | dinitrogen pentoxide                                          | Dinitrogen Pentaoxide                               | Titration of NO <sub>2</sub> with O <sub>3</sub> (quantified by thermal decomposition Cavity Ringdown Spectroscopy of NO <sub>2</sub> ) | 50 | 0.14 | Lee et al 2018     |
| 114.144 | C <sub>6</sub> H <sub>10</sub> O <sub>2</sub> | sum of cyclic saturated and n-unsaturated C5 carboxylic acids | Cyclopentanecarboxylic Acid                         | Liquid Standard supplied by Liquid Calibration Unit (LCU)                                                                               | 20 | 28   | Mungall et al 2017 |
| 116.116 | C <sub>5</sub> H <sub>8</sub> O <sub>3</sub>  | C5 oxo-carboxylic acids                                       | Levulinic Acid                                      | Liquid Standard supplied by Liquid Calibration Unit (LCU)                                                                               | 20 | 11   | Mungall et al 2017 |
| 116.16  | C <sub>6</sub> H <sub>12</sub> O <sub>2</sub> | C6-saturated carboxylic acids                                 | Hexanoic Acid + 4-Methyl-Valeric Acid (equal parts) | Liquid Standard supplied by Liquid Calibration Unit (LCU)                                                                               | 20 | 13   | Mungall et al 2017 |
| 118.132 | C <sub>5</sub> H <sub>10</sub> O <sub>3</sub> | C5-hydroxy-carboxylic acids                                   | 2-Hydroxy-2-methylbutyric Acid                      | Liquid Standard supplied by Liquid Calibration Unit (LCU)                                                                               | 20 | 59   |                    |
| 126.155 | C <sub>7</sub> H <sub>10</sub> O <sub>2</sub> | unsaturated C6 cyclic carboxylic acid                         | 3-Cyclohexene-1-carboxylic Acid                     | Liquid Standard supplied by Liquid Calibration Unit (LCU)                                                                               | 20 | 6    |                    |
| 128.171 | C <sub>7</sub> H <sub>12</sub> O <sub>2</sub> | C6 unsaturated carboxylic acids                               | 6-Heptenoic Acid                                    | Liquid Standard supplied by Liquid Calibration Unit (LCU)                                                                               | 20 | 11   |                    |
| 130.187 | C <sub>7</sub> H <sub>14</sub> O <sub>2</sub> | C7-saturated carboxylic acids                                 | Heptanoic Acid                                      | Liquid Standard supplied by Liquid Calibration Unit (LCU)                                                                               | 20 | 23   |                    |
| 132.159 | C <sub>6</sub> H <sub>12</sub> O <sub>3</sub> | C6 hydroxy-carboxylic acids                                   | 2-Hydroxyisocaproic Acid                            | Liquid Standard supplied by Liquid                                                                                                      | 20 | 1.6  |                    |

|  |  |  |  |                           |  |  |  |
|--|--|--|--|---------------------------|--|--|--|
|  |  |  |  | Calibration Unit<br>(LCU) |  |  |  |
|--|--|--|--|---------------------------|--|--|--|

411

412

Table S3. Standards used to calibrate the PTRMS. <sup>a</sup>C8 aromatics - expected contributions from ethyl benzene, m- and p-xylenes and o-xylene. <sup>b</sup>Monoterpenes - expected contributions from camphene,  $\alpha$ -pinene,  $\beta$ -pinene, myrcene, and tricyclene.

| Molecular weight | Molecular formula                | Compound Name                        | Calibration standard  |
|------------------|----------------------------------|--------------------------------------|-----------------------|
| 30.026           | CH <sub>2</sub> O                | formaldehyde                         | formaldehyde          |
| 32.042           | CH <sub>4</sub> O                | methanol                             | methanol              |
| 34.076           | H <sub>2</sub> S                 | hydrogen sulfide                     | hydrogen sulfide      |
| 41.053           | C <sub>2</sub> H <sub>3</sub> N  | acetonitrile                         | acetonitrile          |
| 44.053           | C <sub>2</sub> H <sub>4</sub> O  | acetaldehyde                         | acetaldehyde          |
| 56.064           | C <sub>3</sub> H <sub>4</sub> O  | acrolein                             | acrolein              |
| 58.08            | C <sub>3</sub> H <sub>6</sub> O  | acetone                              | acetone               |
| 62.13            | C <sub>2</sub> H <sub>6</sub> S  | dimethyl sulfide                     | dimethyl sulfide      |
| 68.119           | C <sub>5</sub> H <sub>8</sub>    | isoprene                             | isoprene              |
| 70.091           | C <sub>4</sub> H <sub>6</sub> O  | MVK, methacrolein, crotonaldehyde    | crotonaldehyde        |
| 72.107           | C <sub>4</sub> H <sub>8</sub> O  | MEK, 2-methyl acetate, ethyl formate | methylethyl ketone    |
| 76.157           | C <sub>3</sub> H <sub>8</sub> S  | 2-propanethiol, ethyl methyl sulfide | ethylmethyl sulfide   |
| 78.114           | C <sub>6</sub> H <sub>6</sub>    | benzene                              | benzene               |
| 84.136           | C <sub>4</sub> H <sub>4</sub> S  | thiophene                            | thiophene             |
| 90.184           | C <sub>4</sub> H <sub>10</sub> S | diethyl sulfide, butanethiol         | diethyl sulfide       |
| 92.141           | C <sub>7</sub> H <sub>8</sub>    | toluene                              | toluene               |
| 98.163           | C <sub>5</sub> H <sub>6</sub> S  | methyl thiophene                     | 2-methylthiophene     |
| 106.168          | C <sub>8</sub> H <sub>10</sub>   | C8 aromatics <sup>a</sup>            | o-xylene              |
| 112.19           | C <sub>6</sub> H <sub>8</sub> S  | dimethylthiophene                    | 2,3-dimethylthiophene |
| 136.238          | C <sub>10</sub> H <sub>16</sub>  | monoterpenes <sup>b</sup>            | camphene              |

418 Table S4. Overlapping compounds measured between the PTRMS and AWAS.

| Molecular Weight | Formula                        | Compound Name       | Instrument     | Decision for budget                  | Decision for EFs                                 |
|------------------|--------------------------------|---------------------|----------------|--------------------------------------|--------------------------------------------------|
| 42.081           | C <sub>3</sub> H <sub>6</sub>  | propene             | AWAS and PTRMS | AWAS                                 | AWAS                                             |
| 54.092           | C <sub>4</sub> H <sub>6</sub>  | butadiene/fragments | PTRMS          | PTRMS                                | PTRMS and AWAS                                   |
|                  |                                | 1,3-butadiene       | AWAS           |                                      |                                                  |
| 56.108           | C <sub>4</sub> H <sub>8</sub>  | butenes             | PTRMS          | AWAS                                 | AWAS                                             |
|                  |                                | cis-2-butene        | AWAS           |                                      |                                                  |
|                  |                                | isobutene           | AWAS           |                                      |                                                  |
|                  |                                | trans-2-butene      | AWAS           |                                      |                                                  |
|                  |                                | 1-butene            | AWAS           |                                      |                                                  |
| 58.124           | C <sub>4</sub> H <sub>10</sub> | butanes             | PTRMS          | AWAS                                 | AWAS                                             |
|                  |                                | isobutane           | AWAS           |                                      |                                                  |
|                  |                                | n-butane            | AWAS           |                                      |                                                  |
| 68.119           | C <sub>5</sub> H <sub>8</sub>  | isoprene            | PTRMS and AWAS | PTRMS                                | PTRMS and AWAS                                   |
| 70.135           | C <sub>5</sub> H <sub>10</sub> | pentene/fragments   | PTRMS          | PTRMS                                | PTRMS and AWAS                                   |
|                  |                                | cis-2-pentene       | AWAS           |                                      |                                                  |
|                  |                                | cyclopentane        | AWAS           |                                      |                                                  |
|                  |                                | 1-pentene           | AWAS           |                                      |                                                  |
|                  |                                | 2-methyl-1-butene   | AWAS           |                                      |                                                  |
|                  |                                | 2-methyl-2-butene   | AWAS           |                                      |                                                  |
|                  |                                | 3-methyl-1-butene   | AWAS           |                                      |                                                  |
|                  |                                | t-2 pentene         | AWAS           |                                      |                                                  |
| 78.114           | C <sub>6</sub> H <sub>6</sub>  | benzene             | PTRMS and AWAS | PTRMS                                | PTRMS                                            |
| 82.146           | C <sub>6</sub> H <sub>10</sub> | cyclohexene         | PTRMS and AWAS | PTRMS                                | PTRMS                                            |
| 84.162           | C <sub>6</sub> H <sub>12</sub> | hexene              | PTRMS and AWAS | PTRMS (hexane)<br>AWAS (cyclohexane) | PTRMS and (hexane)<br>AWAS (cyclohexane)<br>AWAS |
|                  |                                | cyclohexane         | AWAS           |                                      |                                                  |
|                  |                                | cis-2-hexene        | AWAS           |                                      |                                                  |
| 86.178           | C <sub>6</sub> H <sub>14</sub> | hexanes             | PTRMS and AWAS | AWAS                                 | AWAS                                             |
|                  |                                | n-hexane            | AWAS           |                                      |                                                  |
|                  |                                | 2,3-dimethyl butane | AWAS           |                                      |                                                  |
|                  |                                | 2,3-dimethylpentane | AWAS           |                                      |                                                  |

419

420



Table S5. Overlapping compounds measured between the PTRMS and CIMS. <sup>a</sup>The PTRMS signal at molecular weight 60.052 is reported as acetic acid fragment; the signal can also be due to glycoaldehyde (Koss et al., 2018), but the PTRMS and CIMS acetic acid mixing ratios and EFs match each other closely suggesting that the PTRMS fragment is mostly due to acetic acid.

| Molecular weight  | Formula                                            | CIMS compound name                                          | PTRMS compound name                       | Decision                                                       |
|-------------------|----------------------------------------------------|-------------------------------------------------------------|-------------------------------------------|----------------------------------------------------------------|
| 43.025            | HNCO                                               | Isocyanic acid                                              | Isocyanic acid                            | CIMS and PTRMS for reporting EF and ER; CIMS for carbon budget |
| 46.025            | CH <sub>2</sub> O <sub>2</sub>                     | Formic acid                                                 | Formic acid                               | CIMS                                                           |
| 57.052            | C <sub>2</sub> H <sub>3</sub> NO                   | Hydroxy acetonitrile                                        | Methyl isocyanate                         | CIMS and PTRMS                                                 |
| 60.052            | C <sub>2</sub> H <sub>4</sub> O <sub>2</sub>       | Acetic acid                                                 | Acetic acid fragment <sup>a</sup>         | CIMS and PTRMS for reporting EF and ER; CIMS for carbon budget |
| 72.063            | C <sub>3</sub> H <sub>4</sub> O <sub>2</sub>       | Acrylic acid                                                | Methyl glyoxal/acrylic acid               | CIMS                                                           |
| 74.079            | C <sub>3</sub> H <sub>6</sub> O <sub>2</sub>       | Propionic acid                                              | Hydroxy acetone/ethyl formate             | CIMS and PTRMS                                                 |
| 84.074            | C <sub>4</sub> H <sub>4</sub> O <sub>2</sub>       | Unidentified                                                | Furanone                                  | CIMS and PTRMS                                                 |
| 85.062            | C <sub>3</sub> H <sub>3</sub> NO <sub>2</sub>      | Cyanoacetic acid                                            | Methyl cyanofomate                        | CIMS and PTRMS                                                 |
| 86.09             | C <sub>4</sub> H <sub>6</sub> O <sub>2</sub>       | Methacrylic acid                                            | Butanedione/isomers                       | CIMS and PTRMS                                                 |
| <del>88.062</del> | <del>C<sub>3</sub>H<sub>4</sub>O<sub>3</sub></del> | <del>Pyruvic acid</del>                                     | <del>Pyruvic acid</del>                   | <del>CIMS</del>                                                |
| 88.106            | C <sub>4</sub> H <sub>8</sub> O <sub>2</sub>       | C4 saturated carboxylic acids                               | Methyl propanoate                         | CIMS and PTRMS                                                 |
| 100.117           | C <sub>5</sub> H <sub>8</sub> O <sub>2</sub>       | Unsaturated C5 carboxylic acids                             | Methyl methacrylate/isomers               | CIMS and PTRMS                                                 |
| 102.089           | C <sub>4</sub> H <sub>6</sub> O <sub>3</sub>       | C4 oxo-carboxylic acids                                     | Acetic anhydride                          | CIMS and PTRMS                                                 |
| 102.133           | C <sub>5</sub> H <sub>10</sub> O <sub>2</sub>      | C5 saturated carboxylic acids                               | Valeric acid                              | CIMS and PTRMS                                                 |
| 114.144           | C <sub>6</sub> H <sub>10</sub> O <sub>2</sub>      | Sum of cyclic saturated and n-saturated C5 carboxylic acids | Caprolactone/c6 esters/c6diketone isomers | CIMS and PTRMS                                                 |
| 116.16            | C <sub>6</sub> H <sub>12</sub> O <sub>2</sub>      | C6 carboxylic acids                                         | Butyl acetate/c6 esters                   | CIMS and PTRMS                                                 |
| 118.132           | C <sub>7</sub> H <sub>10</sub> O <sub>2</sub>      | Unsaturated C6 cyclic carboxylic acids                      | Cyclohexene carboxylic acid               | CIMS and PTRMS                                                 |
| 128.171           | C <sub>7</sub> H <sub>12</sub> O <sub>2</sub>      | C6 unsaturated carboxylic acids                             | Cyclohexanoic acid                        | CIMS and PTRMS                                                 |
| 130.187           | C <sub>7</sub> H <sub>14</sub> O <sub>2</sub>      | C7 saturated carboxylic acids                               | Amyl acetate                              | CIMS and PTRMS                                                 |

427 Table S6. Compounds with no significant observed emissions

| <b>Molecular Weight</b> | <b>Formula</b>                                | <b>Compound Name</b>        | <b>Instrument</b> |
|-------------------------|-----------------------------------------------|-----------------------------|-------------------|
| 34.08                   | H <sub>2</sub> S                              | hydrogen sulfide            | PTRMS             |
| 70.05                   | C <sub>2</sub> H <sub>3</sub> O <sub>2</sub>  | Propiolic acid              | PTRMS             |
| 72.17                   | C <sub>5</sub> H <sub>12</sub>                | 2,2-dimethylpropane         | AWAS              |
| 82.06                   | C <sub>4</sub> H <sub>2</sub> O <sub>2</sub>  | cyclobutenedione            | PTRMS             |
| 85.06                   | C <sub>3</sub> H <sub>3</sub> NO <sub>2</sub> | cyanoacetic acid            | CIMS              |
| 86.2                    | C <sub>6</sub> H <sub>14</sub>                | 2,2-dimethylbutane          | AWAS              |
| 91.07                   | C <sub>2</sub> H <sub>5</sub> NO <sub>3</sub> | C2 nitro alcohol            | CIMS              |
| 100.07                  | C <sub>4</sub> H <sub>4</sub> O <sub>3</sub>  | dihydro furandione          | PTRMS             |
| 102.195                 | C <sub>5</sub> H <sub>10</sub> S              | cyclopentanethiol           | PTRMS             |
| 104.105                 | C <sub>4</sub> H <sub>8</sub> O <sub>3</sub>  | C4 hydroxy-carboxylic acids | CIMS              |
| 112.24                  | C <sub>8</sub> H <sub>16</sub>                | cis-1,2-dimethylcyclohexane | AWAS              |
| 112.56                  | C <sub>6</sub> H <sub>5</sub> Cl              | chlorobenzene               | PTRMS             |
| 118.13                  | C <sub>5</sub> H <sub>10</sub> O <sub>3</sub> | C5 hydroxy-carboxylic acids | CIMS              |
| 128.29                  | C <sub>9</sub> H <sub>20</sub>                | 2,5-dimethylheptane         | AWAS              |
| 134.24                  | C <sub>10</sub> H <sub>14</sub>               | 1-methyl-2-n-propylbenzene  | AWAS              |
| 140.25                  | C <sub>8</sub> H <sub>12</sub> S              | butylthiophene              | PTRMS             |
| 142.32                  | C <sub>10</sub> H <sub>22</sub>               | 2,2-dimethyloctane          | AWAS              |
| 147.00                  | C <sub>6</sub> H <sub>4</sub> Cl <sub>2</sub> | dichlorobenzene             | PTRMS             |
| 154.12                  | C <sub>7</sub> H <sub>6</sub> O <sub>4</sub>  | dihydroxybenzoic acid       | PTRMS             |
| n/a                     | Cl <sup>-</sup>                               | p-chloride                  | AMS               |

428

429

430

431

432

433

434

435

436

437

438

439

440

Table S7. Emission ratios (relative to CO, as  $\mu\text{g m}^{-3}$  of I/SVOC per  $\mu\text{g m}^{-3}$  CO) for complex mixtures of gas-phase CH, CHO<sub>1</sub>, and CHS<sub>1</sub> compounds grouped by carbon number for all targeted molecular formulas, derived from the integrated cartridge samples, using the sample taken across the lowest transects of Screen 1. ~~Note: based on flight design, it was not possible to directly derive emission factors due to the lack of background cartridge samples in the upwind region of the fire so ratios to CO in the concentrated lower (Screen 1) transects are used in the analysis to approximate emission factors from the wildfire.~~ The ERs are reported as a range with the lower limit reflecting the subtraction of a slightly contaminated background, and the upper limit having no background subtracted.

| Carbon Number | CH ( $\mu\text{g m}^{-3}$ )/<br>CO ( $\mu\text{g m}^{-3}$ ) | CHO <sub>1</sub> ( $\mu\text{g m}^{-3}$ )/<br>CO ( $\mu\text{g m}^{-3}$ ) | CHS <sub>1</sub> ( $\mu\text{g m}^{-3}$ )/<br>CO ( $\mu\text{g m}^{-3}$ ) |
|---------------|-------------------------------------------------------------|---------------------------------------------------------------------------|---------------------------------------------------------------------------|
| 10            | 1.1E-02 - 1.1E-02                                           | 3.2E-03 - 3.2E-03                                                         | 7.2E-06 - 7.9E-06                                                         |
| 11            | 0.0E+00 - 0.0E+00                                           | 6.6E-04 - 6.6E-04                                                         | 1.6E-05 - 1.6E-05                                                         |
| 12            | 5.4E-05 - 5.4E-05                                           | 4.6E-04 - 7.4E-04                                                         | 0.0E+00 - 2.4E-06                                                         |
| 13            | 3.3E-06 - 2.4E-04                                           | 4.4E-05 - 5.4E-04                                                         | 9.2E-06 - 1.4E-05                                                         |
| 14            | 5.3E-05 - 1.6E-04                                           | 3.7E-04 - 1.1E-03                                                         | 4.4E-06 - 5.8E-06                                                         |
| 15            | 6.0E-05 - 3.7E-04                                           | 3.3E-04 - 1.0E-03                                                         | 2.2E-05 - 2.4E-05                                                         |
| 16            | 3.4E-04 - 1.1E-03                                           | 3.6E-04 - 7.0E-04                                                         | 5.4E-05 - 6.8E-05                                                         |
| 17            | 7.6E-04 - 1.2E-03                                           | 1.2E-03 - 1.9E-03                                                         | 3.3E-04 - 3.4E-04                                                         |
| 18            | 1.0E-03 - 1.7E-03                                           | 2.1E-04 - 1.3E-03                                                         | 1.2E-04 - 1.2E-04                                                         |
| 19            | 1.6E-03 - 1.9E-03                                           | 5.7E-04 - 1.2E-03                                                         | 3.9E-04 - 4.3E-04                                                         |
| 20            | 1.9E-03 - 2.8E-03                                           | 3.1E-04 - 9.1E-04                                                         | 1.1E-04 - 1.4E-04                                                         |
| 21            | 2.5E-03 - 2.5E-03                                           | 2.6E-04 - 5.2E-04                                                         | 2.3E-04 - 2.9E-04                                                         |
| 22            | 3.8E-03 - 4.0E-03                                           | 1.7E-04 - 3.3E-04                                                         | 1.9E-05 - 8.9E-05                                                         |
| 23            | 2.1E-03 - 2.2E-03                                           | 6.7E-05 - 1.5E-04                                                         | 2.9E-05 - 2.9E-05                                                         |
| 24            | 7.6E-04 - 1.0E-03                                           | 3.3E-05 - 1.2E-04                                                         | 4.4E-05 - 6.0E-05                                                         |
| 25            | 4.0E-04 - 4.3E-04                                           | 9.0E-06 - 5.5E-05                                                         | 1.3E-05 - 6.1E-05                                                         |

461 Table S8. Compounds shown in Fig. 9 where the identifications/naming are not exact matches with  
462 the current study. 1 Individually identified compounds were summed for comparison to the present study;  
463 2 Each compound was compared with the value from the present study.

| Molecular Weight | Compound                                     | Instrument | Compound Name                                                 | Andreae Names                             | Koss Names                                                     | Permar Names                                                                | Urbanski Names                                                                       |
|------------------|----------------------------------------------|------------|---------------------------------------------------------------|-------------------------------------------|----------------------------------------------------------------|-----------------------------------------------------------------------------|--------------------------------------------------------------------------------------|
| 54.092           | C <sub>4</sub> H <sub>6</sub>                | PTRMS      | butadiene/fr<br>agments                                       | butadiene                                 | 1,3-butadiene<br>+ 1,2-<br>butadiene                           | 1,3-butadiene,<br>1,2-butadiene                                             | n/a                                                                                  |
| 54.092           | C <sub>4</sub> H <sub>6</sub>                | AWAS       | 1,3-<br>butadiene                                             | butadiene                                 | 1,3-butadiene<br>+ 1,2-<br>butadiene                           | 1,3-butadiene,<br>1,2-butadiene                                             | n/a                                                                                  |
| 57.052           | C <sub>2</sub> H <sub>3</sub> NO             | CIMS       | hydroxy<br>acetonitrile                                       | n/a                                       | methyl<br>isocyanate +<br>hydroxyaceto<br>nitrile              | methyl<br>isocyanate,<br>hydroxyacetonitril<br>e                            | n/a                                                                                  |
| 58.124           | C <sub>4</sub> H <sub>10</sub>               | AWAS       | isobutane                                                     | n/a                                       | n/a                                                            | n-Butane                                                                    | n/a                                                                                  |
| 60.052           | C <sub>2</sub> H <sub>4</sub> O <sub>2</sub> | CIMS       | acetic acid                                                   | Acetic acid                               | acetic acid +<br>glycolaldehyd<br>e                            | acetic acid,<br>glycolaldehyde<br>(=hydroxylacetalde<br>hyde)               | n/a                                                                                  |
| 60.096           | C <sub>3</sub> H <sub>8</sub> O              | PTRMS      | propanol                                                      | n/a                                       | n/a                                                            | Isopropanol                                                                 | n/a                                                                                  |
| 66.103           | C <sub>5</sub> H <sub>6</sub>                | PTRMS      | cyclopentan<br>diene                                          | n/a                                       | n/a                                                            | 1,3-<br>cyclopentadiene                                                     | 1,3-<br>Cyclopentadie<br>nePIT                                                       |
| 70.091           | C <sub>4</sub> H <sub>6</sub> O              | PTRMS      | MVK,<br>methacrolein<br>,<br>crotonaldeh<br>yde               | Methacrolei<br>n                          | MVK +<br>methacrolein<br>+<br>crotonaldeh<br>yde               | Methyl vinyl<br>ketone,<br>Methacrolein, 2-<br>Butenal<br>(=crotonaldehyde) | <sup>1</sup> Crotonaldehy<br>de +<br>Methacrolein<br>+ Methyl<br>Vinyl Ketone<br>MVK |
| 70.135           | C <sub>5</sub> H <sub>10</sub>               | PTRMS      | pentene/met<br>hyl<br>butene/frag<br>ments                    | 1-Pentene +<br>2-pentene                  | pentene+met<br>hyl butene                                      | pentenes,<br>methylbutenes                                                  | n/a                                                                                  |
| 70.135           | C <sub>5</sub> H <sub>10</sub>               | AWAS       | c-2-pentene                                                   | 2 pentene<br>cis&tran                     | pentene+met<br>hyl butene                                      | pentenes,<br>methylbutenes                                                  | n/a                                                                                  |
| 70.135           | C <sub>5</sub> H <sub>10</sub>               | AWAS       | cyclopentan<br>e                                              |                                           |                                                                | cyclopentane                                                                | n/a                                                                                  |
| 70.135           | C <sub>5</sub> H <sub>10</sub>               | AWAS       | 1-pentene                                                     | 1-Pentene                                 | pentene+met<br>hyl butene                                      | pentenes,<br>methylbutenes                                                  | n/a                                                                                  |
| 70.135           | C <sub>5</sub> H <sub>10</sub>               | AWAS       | methyl-1-<br>butene                                           | 1-Pentene                                 | pentene+met<br>hyl butene                                      | pentenes,<br>methylbutenes                                                  | n/a                                                                                  |
| 70.135           | C <sub>5</sub> H <sub>10</sub>               | AWAS       | methyl-2-<br>butene                                           | 1-Pentene                                 | pentene+met<br>hyl butene                                      | pentenes,<br>methylbutenes                                                  | n/a                                                                                  |
| 72.063           | C <sub>3</sub> H <sub>4</sub> O <sub>2</sub> | CIMS       | acrylic acid                                                  | n/a                                       | n/a                                                            | pyruvaldehyde<br>(=methyl<br>glyoxal), acrylic<br>acid                      | n/a                                                                                  |
| 72.107           | C <sub>4</sub> H <sub>8</sub> O              | PTRMS      | methy ethyl<br>ketone +<br>butanal + 2-<br>methylpropa<br>nal | 2-butanone<br>(methyl<br>ethyl<br>ketone) | methyl ethyl<br>ketone +<br>butanal + 2-<br>methylpropan<br>al | methyl ethyl<br>ketone, 2-<br>methylpropanal,<br>butanal                    | <sup>1</sup> Methyl Ethyl<br>Ketone MEK<br>+ n-Butanal + 2-                          |

|         |                                              |       |                                 |                          |                                                        |                                               |                                                    |
|---------|----------------------------------------------|-------|---------------------------------|--------------------------|--------------------------------------------------------|-----------------------------------------------|----------------------------------------------------|
|         |                                              |       |                                 |                          |                                                        |                                               | Methylpropanal                                     |
| 72.151  | C <sub>5</sub> H <sub>12</sub>               | AWAS  | methylbutane                    | n/a                      | n/a                                                    | n-pentane                                     | n/a                                                |
| 74.079  | C <sub>3</sub> H <sub>6</sub> O <sub>2</sub> | PTRMS | hydroxyacetone/ethyl formate    | n/a                      | methyl acetate + ethyl formate + hydroxyacetone        | Hydroxyacetone, Methyl acetate, Ethyl formate | Ethyl Formate                                      |
| 81.118  | C <sub>5</sub> H <sub>7</sub> N              | PTRMS | pentene nitriles/methyl pyrrole | n/a                      | n/a                                                    | n/a                                           | 1-Methylpyrrole                                    |
| 82.102  | C <sub>5</sub> H <sub>6</sub> O              | PTRMS | methyl furan                    | n/a                      | 2-methylfuran + 3-methylfuran + general HCO            | 2-Methylfuran, 3-Methylfuran                  | <sup>2</sup> 2-Methylfuran, 3-Methylfuran          |
| 84.118  | C <sub>5</sub> H <sub>8</sub> O              | PTRMS | cyclopentanone/ isomers         | n/a                      | 3-methyl-3-buten-2-one + cyclopentanone + HCO1 isomers | 3-Methyl-3-buten-2-one, Cyclopentanone        | Cyclopentanone                                     |
| 84.162  | C <sub>6</sub> H <sub>12</sub>               | PTRMS | hexene/fragments                | 1-hexene                 | n/a                                                    | n/a                                           | <sup>2</sup> 1-Hexene, cis-2-Hexene                |
| 86.09   | C <sub>4</sub> H <sub>6</sub> O <sub>2</sub> | PTRMS | butanedione/ isomers            | 2,3-butanedione          | 2,3-butanedione + methyl acrylate + other HCO2         | 2,3-butanedione, methyl acrylate              | 2,3-Butadione                                      |
| 86.134  | C <sub>5</sub> H <sub>10</sub> O             | PTRMS | pentanone                       | n/a                      | n/a                                                    | n/a                                           | <sup>2</sup> 2-Pentanone, 3-Pentanone              |
| 86.178  | C <sub>6</sub> H <sub>14</sub>               | AWAS  | 2+3-methylpentane               | n/a                      | n/a                                                    | 3-methylpentane                               | 3-Methylpentane                                    |
| 96.085  | C <sub>5</sub> H <sub>4</sub> O <sub>2</sub> | PTRMS | furfural                        | furfural (2-furaldehyde) | 2-furfural + 3-furfural + other HCO2                   | 2-furfural (=furaldehyde), 3-furfural         | 2-Furaldehyde                                      |
| 98.189  | C <sub>7</sub> H <sub>14</sub>               | PTRMS | heptene                         | n/a                      | n/a                                                    | n/a                                           | 1-Heptene                                          |
| 100.117 | C <sub>5</sub> H <sub>8</sub> O <sub>2</sub> | PTRMS | methyl methacrylate / isomers   | n/a                      | Methyl methacrylate + other HCO2                       | Methyl methacrylate                           | Methyl Methacrylate                                |
| 100.161 | C <sub>6</sub> H <sub>12</sub> O             | PTRMS | hexanal/hexanones               | n/a                      | hexanal + hexanones                                    | Hexanones, Hexanal                            | <sup>1</sup> n-Hexanal + Hexanones                 |
| 103.124 | C <sub>7</sub> H <sub>5</sub> N              | PTRMS | benzonitrile                    | n/a                      | Benzonitrile                                           | Benzonitrile                                  | Benzenenitrile                                     |
| 106.168 | C <sub>8</sub> H <sub>10</sub>               | PTRMS | C8 aromatics                    | n/a                      | Ethyl benzene + m-xylene + p-                          | C8 Aromatics                                  | <sup>1</sup> Ethylbenzene + m,p-Xylenes + o-Xylene |

|         |                                 |       |                                           |                                                                                             |                                              |                                                         |                                                                                                                                                                            |
|---------|---------------------------------|-------|-------------------------------------------|---------------------------------------------------------------------------------------------|----------------------------------------------|---------------------------------------------------------|----------------------------------------------------------------------------------------------------------------------------------------------------------------------------|
|         |                                 |       |                                           |                                                                                             | xylene + o-xylene                            |                                                         |                                                                                                                                                                            |
| 112.216 | C <sub>8</sub> H <sub>16</sub>  | PTRMS | octene                                    | n/a                                                                                         | n/a                                          | n/a                                                     | 1-Octene                                                                                                                                                                   |
| 118.135 | C <sub>8</sub> H <sub>6</sub> O | PTRMS | benzofuran                                | n/a                                                                                         | Benzofuran                                   | Benzofuran                                              | BenzofuranPI<br>T                                                                                                                                                          |
| 118.179 | C <sub>9</sub> H <sub>10</sub>  | PTRMS | methylstyrenes/<br>propenyl benzenes      | n/a                                                                                         | Indane + methyl styrenes + propenyl benzenes | Methylstyrenes, Indane, Propenylbenzenes                | <sup>1</sup> 1-Propenylbenzene, 2-Methylstyrene, 2-Propenylbenzene, 3-Methylstyrene, 4-Methylstyrene, alpha-Methylstyrene                                                  |
| 120.195 | C <sub>9</sub> H                | PTRMS | C9 aromatics                              | 1,2,3-trimethylbenzen, 1,2,4-trimethylbenzen, 1,3,5-trimethylbenzene (Simpson et al., 2011) | C9 aromatics                                 | C9 aromatics                                            | <sup>1</sup> 1,2,3-Trimethylbenzene, 1,2,4-Trimethylbenzene, 1,3,5-Trimethylbenzene, 1-Ethyl-2-Methylbenzene, 1-Ethyl-3,4-Methylbenzene, Isopropylbenzene, n-Propylbenzene |
| 132.162 | C <sub>9</sub> H <sub>8</sub> O | PTRMS | methyl benzo furans                       | n/a                                                                                         | Methyl benzofuran                            | Methylbenzofurans                                       | <sup>1</sup> Methylbenzofuran isomer 1, Methylbenzofuran isomer 2, Methylbenzofuran isomer 3                                                                               |
| 132.206 | C <sub>10</sub> H <sub>12</sub> | PTRMS | ethyl styrene/<br>methyl propenyl benzene | n/a                                                                                         | Methyl propenyl benzene + ethyl styrene      | Ethyl styrenes, Methylpropenylbenzenes, Butenylbenzenes | <sup>1</sup> 1-Methyl-1-Propenylbenzene, Ethylstyrene                                                                                                                      |
| 134.222 | C <sub>10</sub> H <sub>14</sub> | PTRMS | C10 Aromatics                             | n/a                                                                                         | C10 Aromatics                                | C10 Aromatics                                           | <sup>1</sup> 1,4-Diethylbenzene,                                                                                                                                           |

|         |                                 |       |                                  |                                                   |              |              |                                                                                                                                                                             |
|---------|---------------------------------|-------|----------------------------------|---------------------------------------------------|--------------|--------------|-----------------------------------------------------------------------------------------------------------------------------------------------------------------------------|
|         |                                 |       |                                  |                                                   |              |              | 1-Butenylbenzene, Ethyl Xylene isomer 1, Ethyl Xylene isomer 2, Isobutylbenzene, Methyl-n-Propylbenzene isomer 1, Methyl-n-Propylbenzene isomer 2, n-Butylbenzene, p-Cymene |
| 136.238 | C <sub>10</sub> H <sub>16</sub> | PTRMS | monoterpenes                     | sum of alpha + beta-pinene (Simpson et al., 2011) | monoterpenes | monoterpenes | n/a                                                                                                                                                                         |
| 148.249 | C <sub>11</sub> H <sub>16</sub> | PTRMS | C11 aromatics/pentamethylbenzene | n/a                                               | n/a          | n/a          | C11 Aromatics                                                                                                                                                               |

464

465

466 Table S9. Emission speciation profile for SAPRC11 chemical mechanism derived from normalized EFs  
 467 from the present study and compared with wildfire smoldering emission speciation profile from the EPA  
 468 SPECIATEv4.5 #95428 dataset. Note that SESQ (sesquiterpene), WSOC (water soluble organic carbon)  
 469 and IVOC are non-standard SAPRC11 mechanism species. Please refer to Carter and Heo (2013) for  
 470 mechanism species definition.

| <b>SAPRC11 Lumped Species Name</b> | <b>Molecular Weight (g/mol)</b> | <b>Normalized Mass Fraction (Hayden et al.)</b> | <b>Normalized Mass Fraction (SPECIATEv4.5 #95428)</b> |
|------------------------------------|---------------------------------|-------------------------------------------------|-------------------------------------------------------|
| CCOOH                              | 60.05                           | 0.038                                           | 0.031                                                 |
| ACET                               | 58.08                           | 0.024                                           | 0.0072                                                |
| ACYL                               | 26.04                           | 0.0080                                          | 0.00059                                               |
| ALK1                               | 30.07                           | 0.039                                           | 0.011                                                 |
| ALK2                               | 36.73                           | 0.013                                           | 0.0043                                                |
| ALK3                               | 58.61                           | 0.0063                                          | 0.0077                                                |
| ALK4                               | 77.6                            | 0.0055                                          | 0.030                                                 |
| ALK5                               | 118.89                          | 0.0053                                          | 0.28                                                  |
| ARO1                               | 95.16                           | 0.031                                           | 0.034                                                 |
| ARO2                               | 118.72                          | 0.042                                           | 0.067                                                 |
| BACL                               | 86.09                           | 0.021                                           | 0.0050                                                |
| BALD                               | 106.13                          | 0.0020                                          | 0.0034                                                |
| BENZ                               | 78.11                           | 0.013                                           | 0.0035                                                |
| CATL                               | 110.1                           | 0.0032                                          | 0.014                                                 |
| CCHO                               | 44.05                           | 0.032                                           | 0.023                                                 |
| CH4                                | 16.043                          | 0.24                                            | 0.044                                                 |
| CRES                               | 108.14                          | 0.0026                                          | 0.0027                                                |
| ETHE                               | 28.05                           | 0.044                                           | 0.0065                                                |
| HCOOH                              | 46.03                           | 0.0050                                          | 0.0038                                                |
| GLY                                |                                 |                                                 | 0.000046                                              |
| HCHO                               | 30.03                           | 0.030                                           | 0.0084                                                |
| IPRD                               | 100.12                          | 0.00020                                         | 0.0037                                                |
| ISOP                               | 68.12                           | 0.021                                           | 0.00041                                               |
| MACR                               | 70.09                           | 0.010                                           | 0.0044                                                |
| MEK                                | 72.11                           | 0.0066                                          | 0.0028                                                |
| MEOH                               | 32.04                           | 0.057                                           | 0.016                                                 |
| MGLY                               |                                 |                                                 | 0.000037                                              |
| MVK                                | 70.09                           | 0.0057                                          | 0.019                                                 |
| NROG                               | 1                               | 0.11                                            | 0.13                                                  |
| NVOL                               | 1                               | 1.18E-05                                        |                                                       |
| OLE1                               | 72.34                           | 0.079                                           | 0.049                                                 |
| OLE2                               | 75.78                           | 0.019                                           | 0.025                                                 |
| PACD                               | 74.08                           | 0.055                                           | 0.00047                                               |
| PHEN                               | 94.11                           | 0.0055                                          | 0.0054                                                |
| PROD2                              | 116.16                          | 0.0044                                          | 0.027                                                 |



|      |        |        |        |
|------|--------|--------|--------|
| RCHO | 58.08  | 0.038  | 0.0035 |
| TERP | 136.24 | 0.024  | 0.032  |
| XYNL | 122.16 | 0.0080 |        |
| SESQ | 204.35 | 0.039  |        |
| WSOC | 227    | 0.013  |        |
| IVOC | 227.3  | 0.0063 |        |

471

472

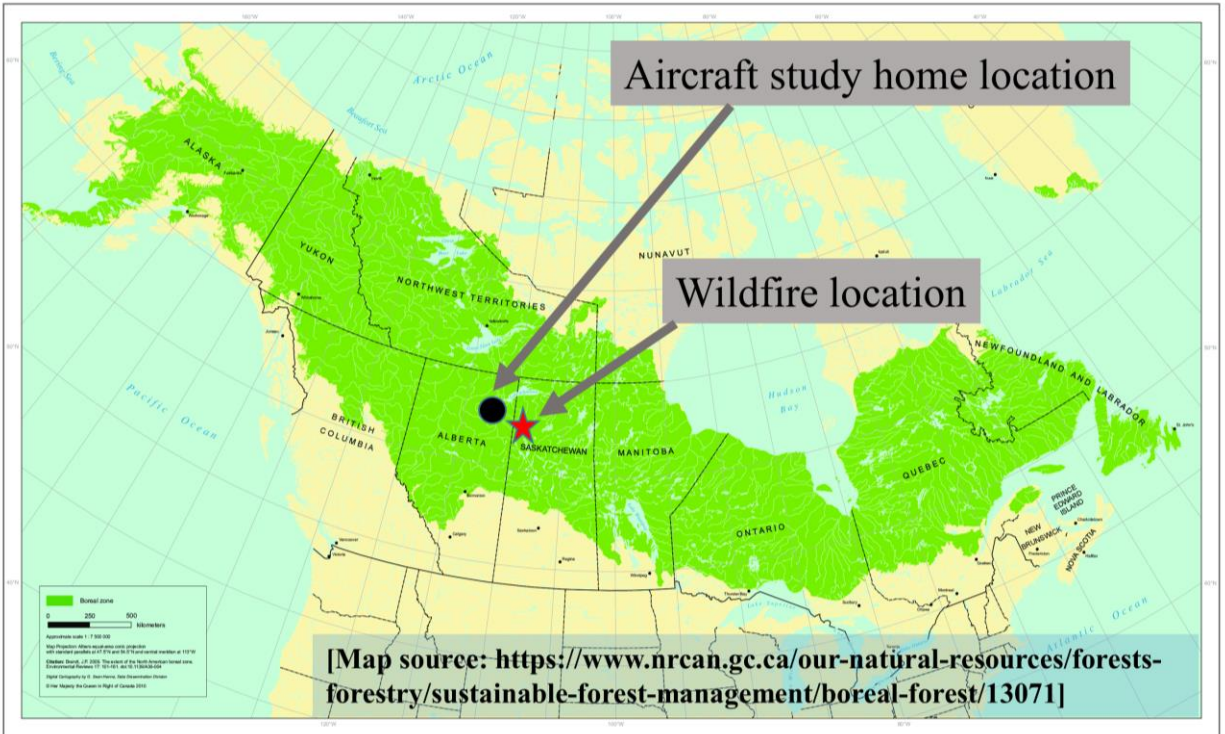

Figure S1. Map showing the home location of the airborne study at Fort McMurray, Alberta and the location of the wildfire in Saskatchewan. The green shaded region shows the extent of the boreal forest coverage across Canada and Alaska.

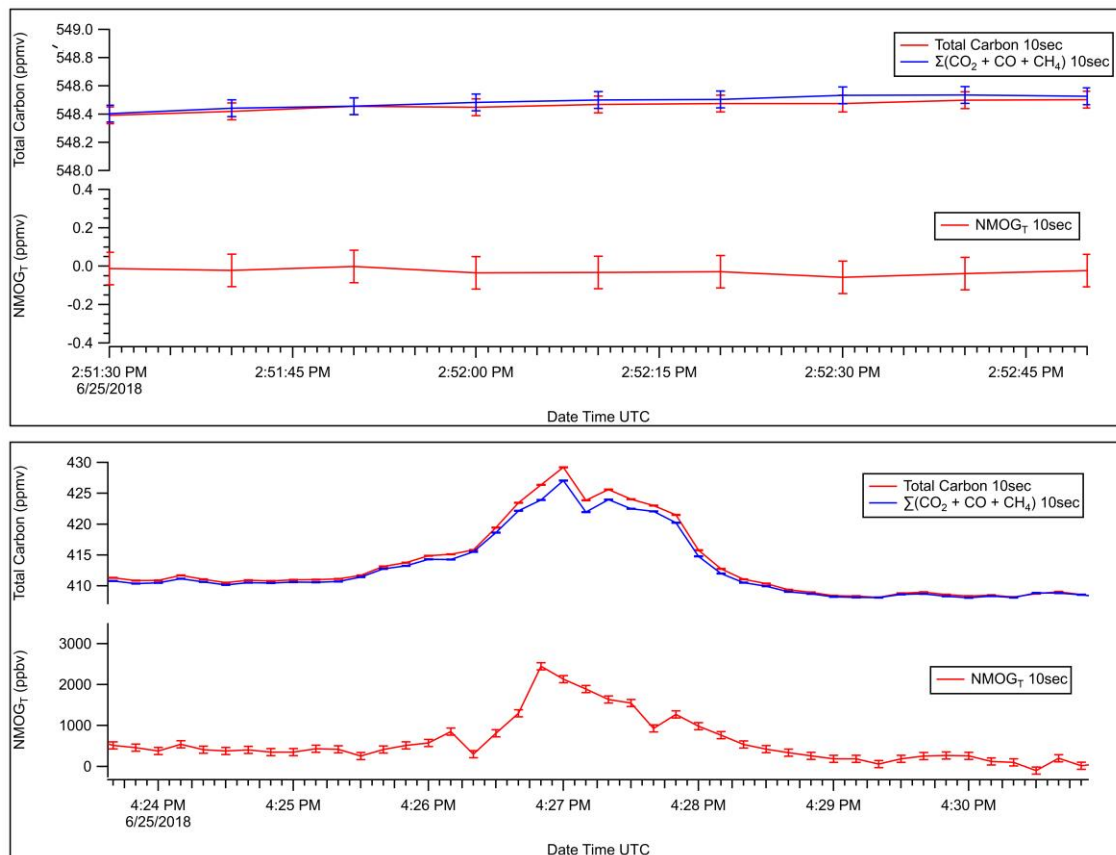

Figure S2. Total carbon (TC),  $\Sigma(\text{CO}_2+\text{CO}+\text{CH}_4)$  (ppmv C), and  $\text{NMOG}_T$  (ppmv C or ppbv C) averaged to 10 sec for a) a portion of the in-flight calibration time period, and b) a selected plume along Screen 1.  $\text{NMOG}_T$ , the difference between the TC and  $\Sigma(\text{CO}_2+\text{CO}+\text{CH}_4)$ , has an uncertainty of  $\pm 85$  ppbv C.

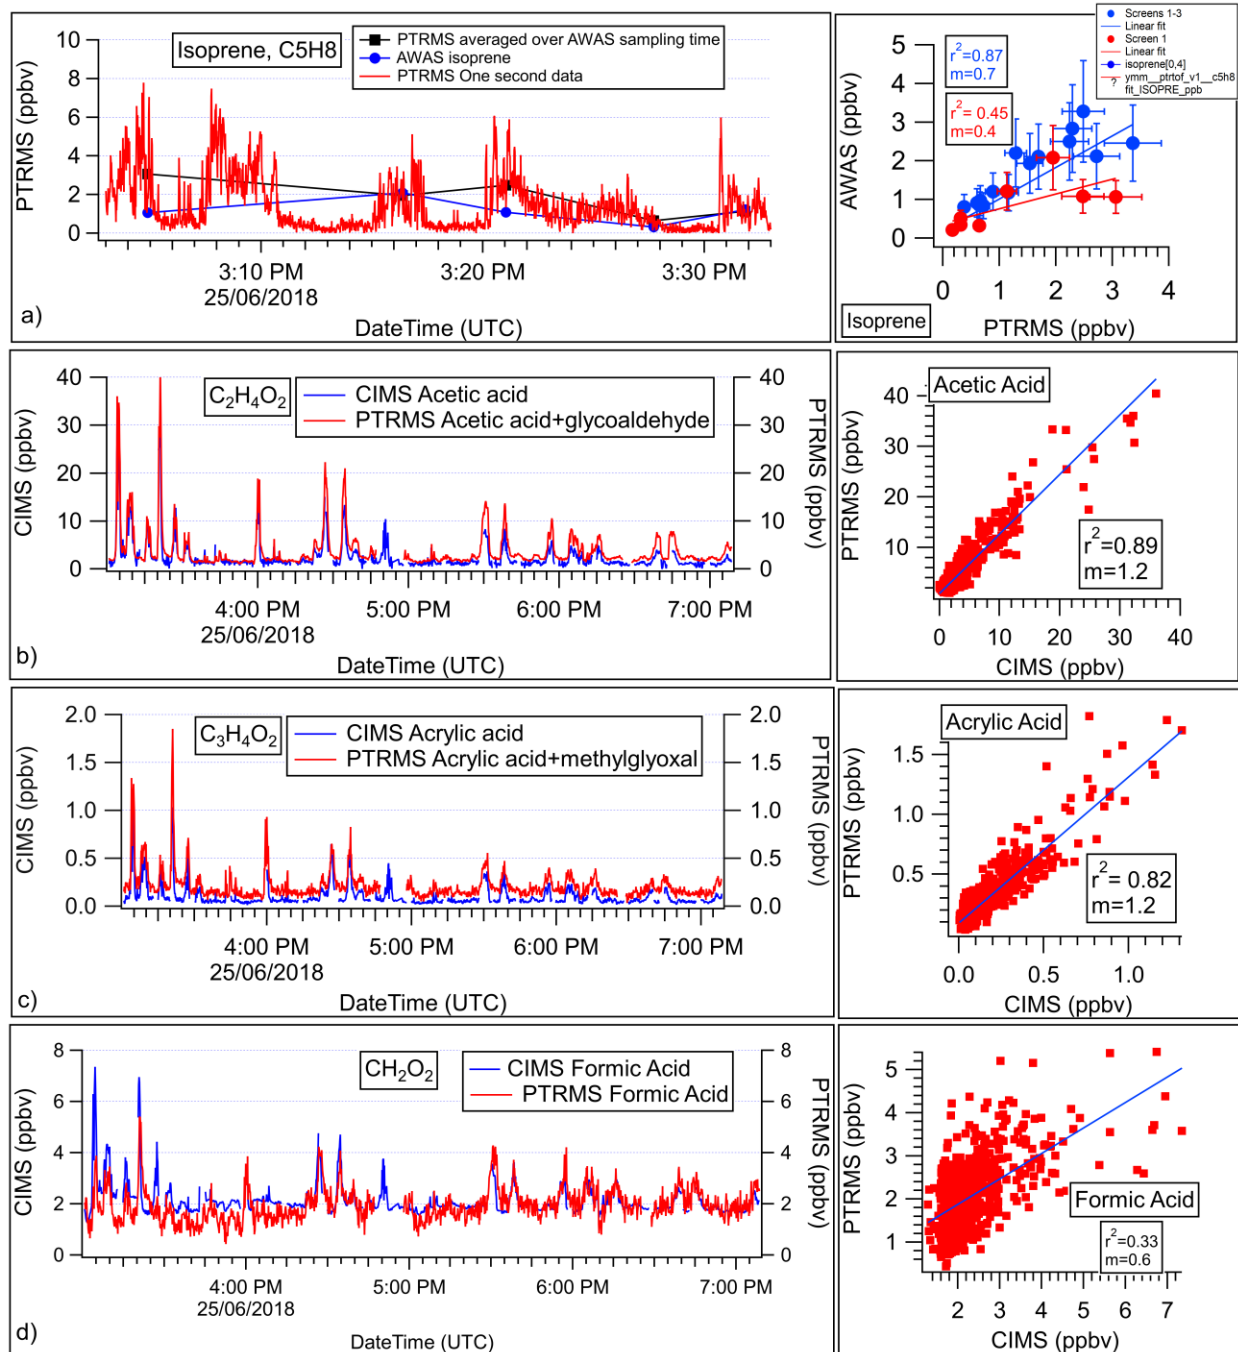

Figure S3. Intercomparisons of overlapping compounds between the PTRMS and AWAS, and between the PTRMS and CIMS for a) isoprene, b) acetic acid, c) acrylic acid, and d) formic acid.

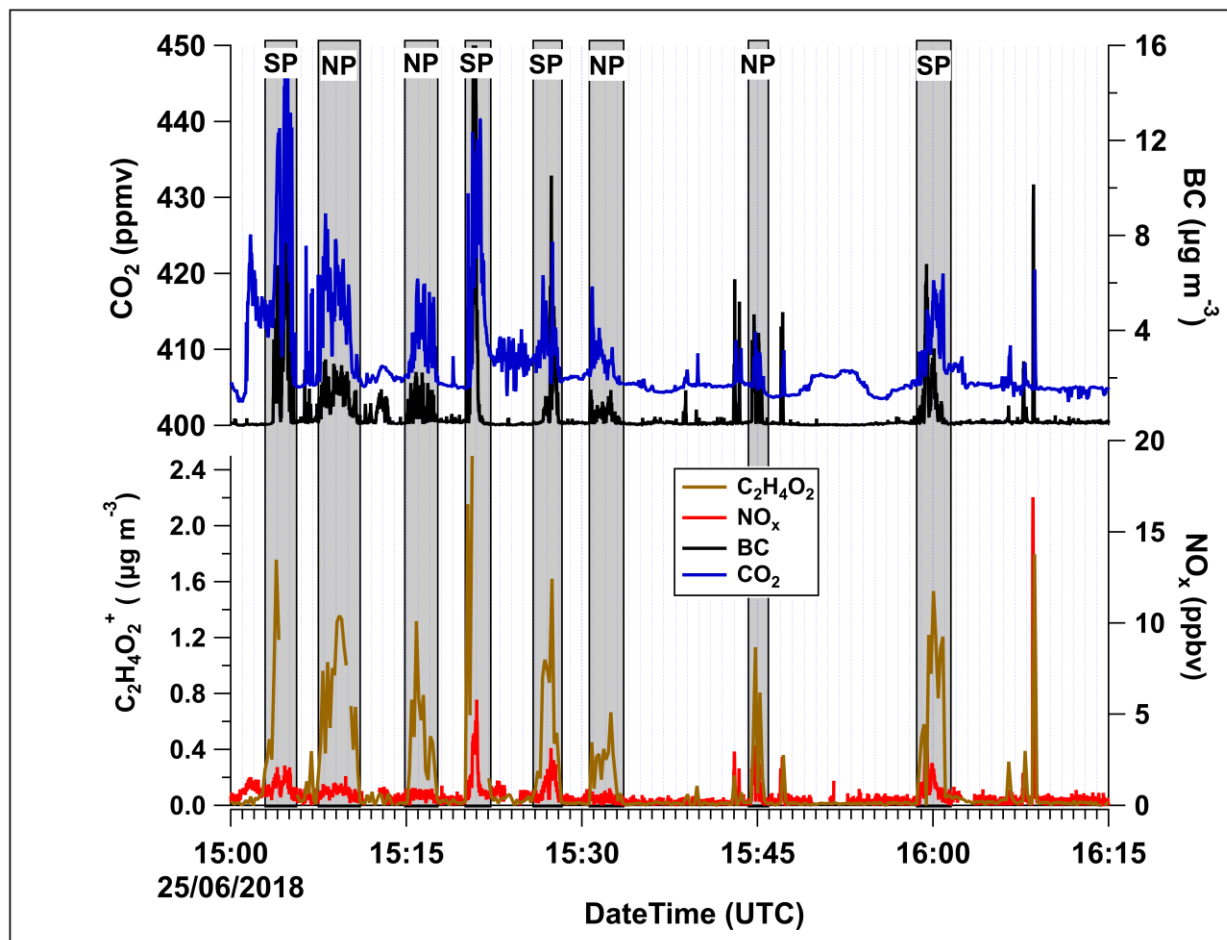

Figure S42. Time series of CO<sub>2</sub>, BC and NO<sub>x</sub> mixing ratios, and C<sub>2</sub>H<sub>4</sub>O<sub>2</sub><sup>+</sup> (levoglucosan fragment derived from the AMS) concentrations for Screen 1. The in-plume portions are indicated by the vertical grey bars. The aircraft flew back and forth across the plumes at increasing altitudes to complete five transects; a transect represents one pass across the SP and NP at the same altitude.

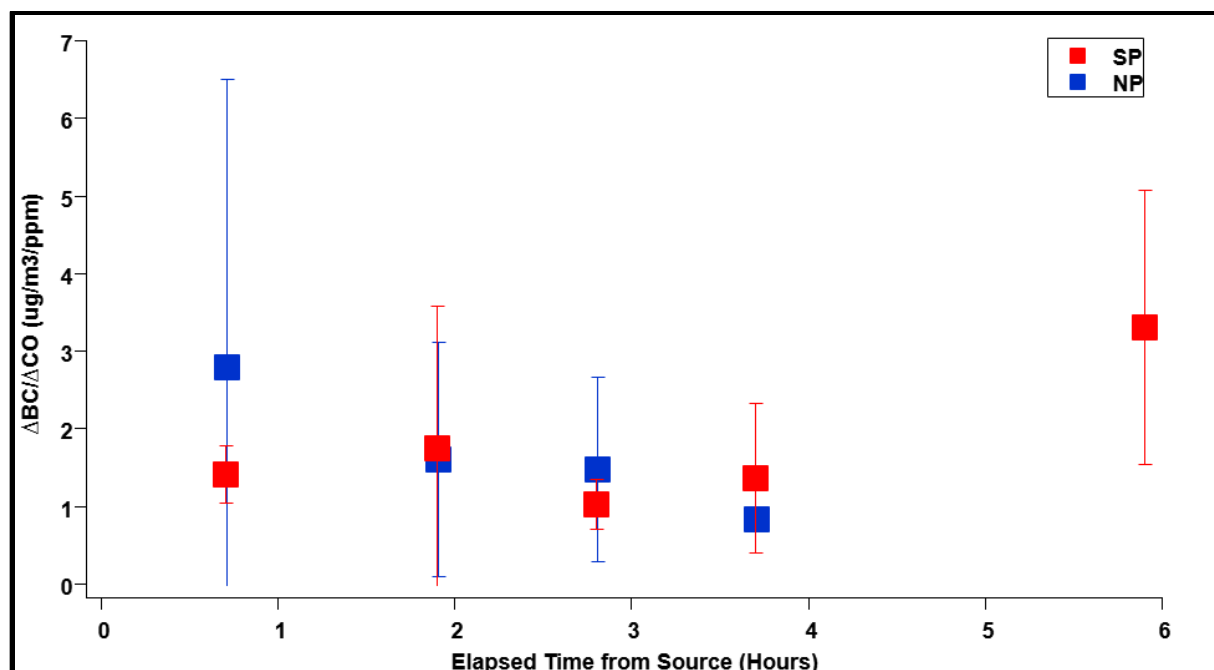

Figure S53. Using  $\Delta BC/\Delta CO$  (Selimovic et al., 2019) as an indicator of plume mixing downwind of the Lac LaLoche fire. The squares show the average and the vertical lines the standard deviation for the transects within the mixed layer for each screen.

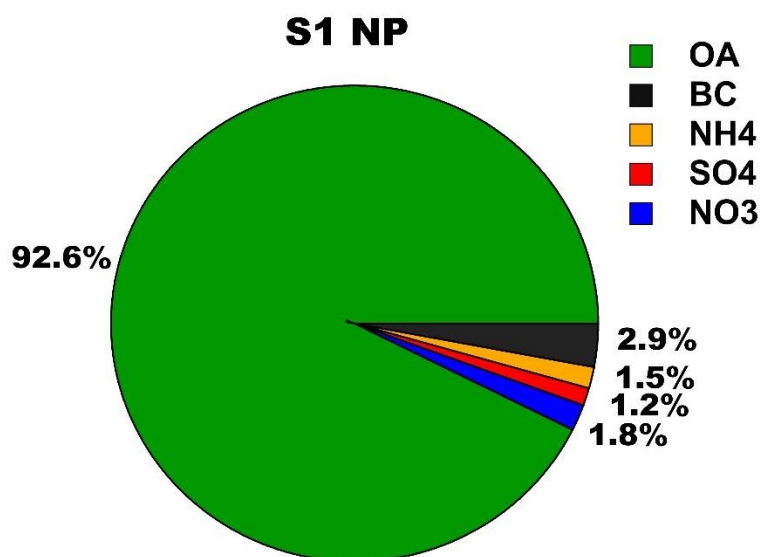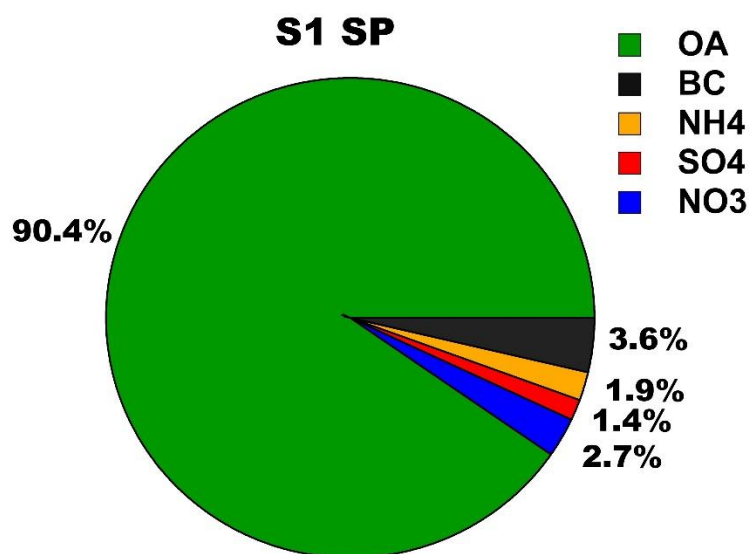

521  
 522 Figure S64. Percent contribution from individually measured particle-phase species for the NP and SP  
 523 including p-organics (OA), black carbon (BC), ammonium (NH<sub>4</sub>), sulphate (SO<sub>4</sub>) and nitrate (NO<sub>3</sub>), based  
 524 on mass concentrations.

525

526

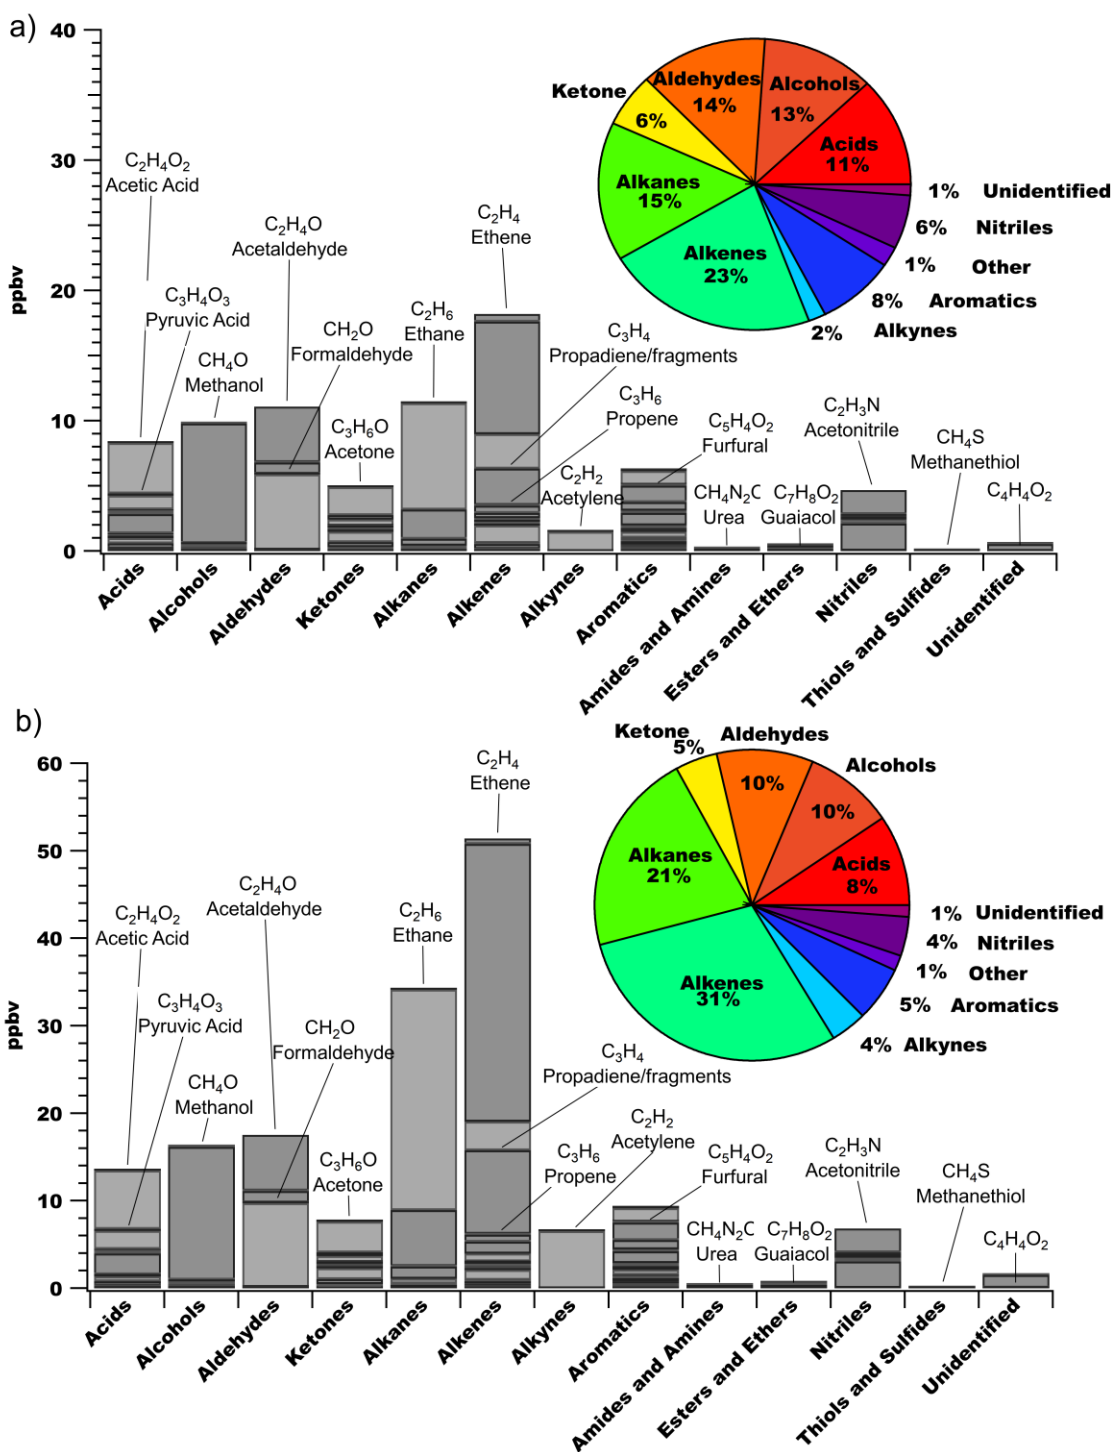

527

528 Figure S75. Background-subtracted mixing ratios of individually measured NMOGs from the PTRMS,  
 529 CIMS and AWAS are shown for thirteen chemical classes for the a) NP and b) SP. In some cases,  
 530 compounds are double- (or triple-) counted if they can be identified in more than one category. For  
 531 example, phenol is an alcohol + an aromatic; guaiacol is an alcohol + an ether + an aromatic. In the pie



532 chart, the *Other* category includes amides, amines, ethers, thiols and sulfides. The *Unidentified* category  
 533 contains molecular formulas detected but the compound(s) could not be identified.

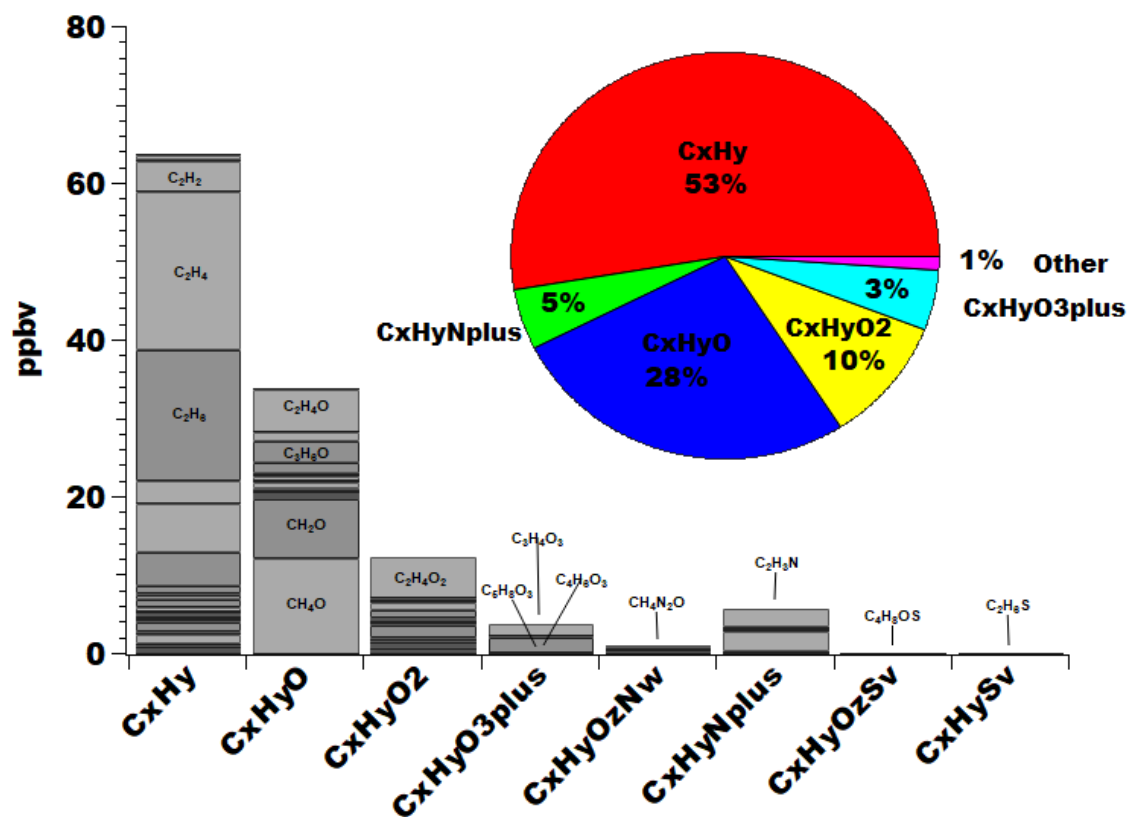

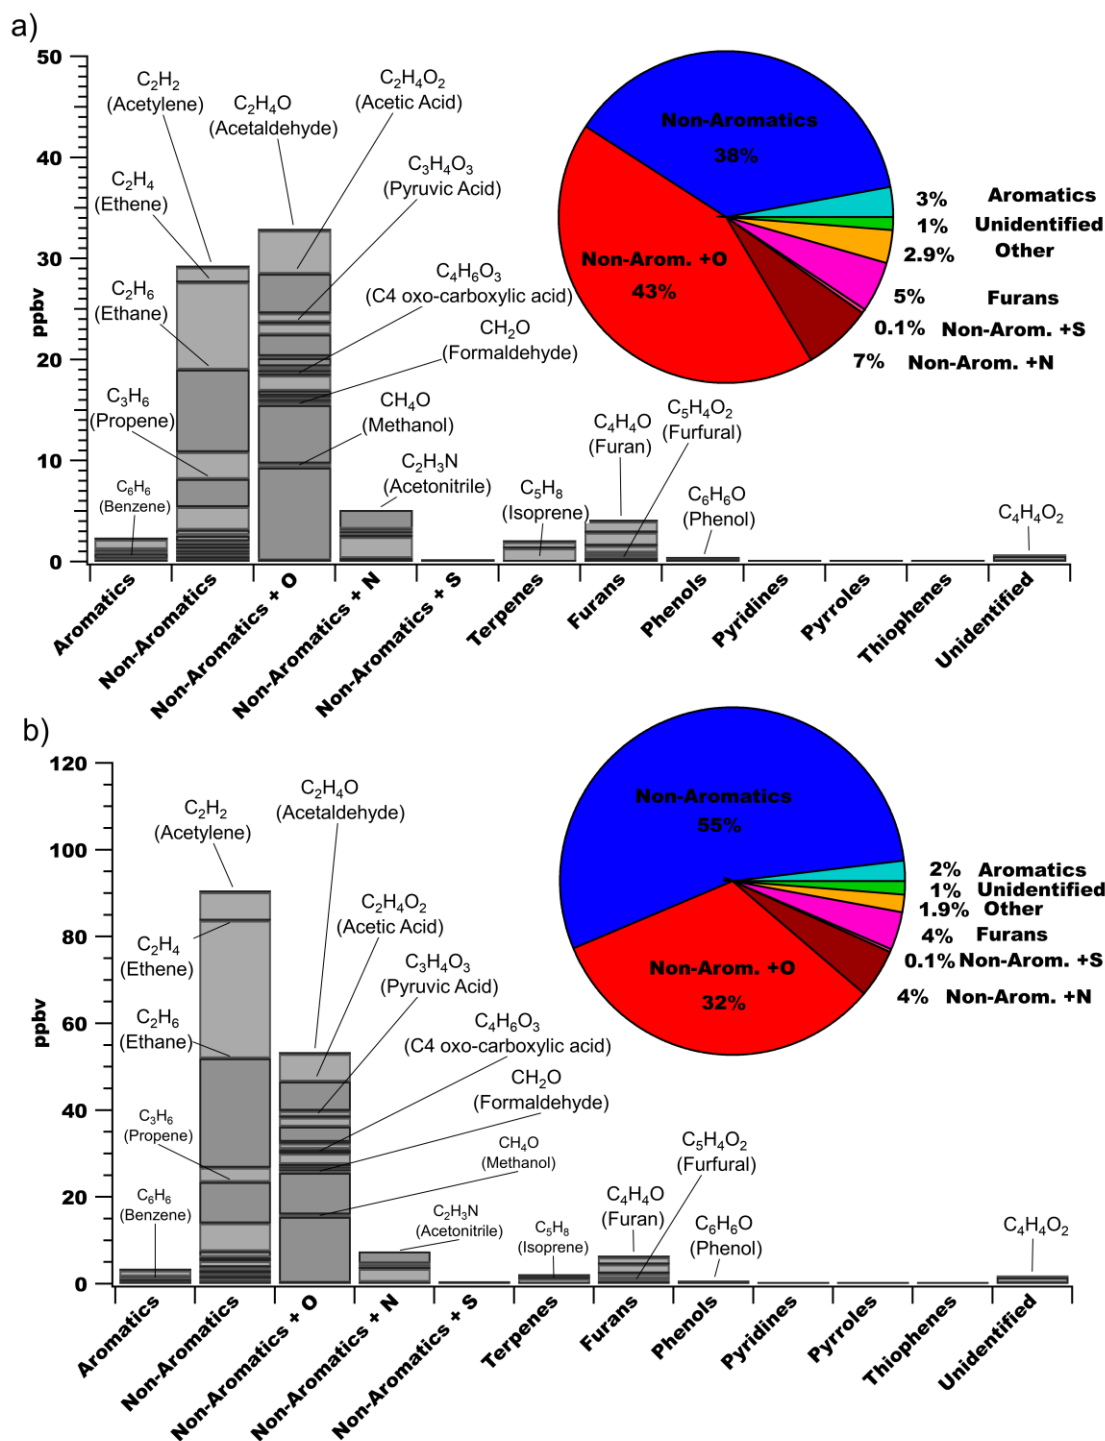

539

540 Figure S97. Average mixing ratios of individually measured NMOGs from the PTRMS, CIMS and

541 AWAS by structural group for the a) NP and b) SP. The *Other* category is the sum of terpenes, phenols,

542 pyridines, pyrroles and thiophenes.

543

544

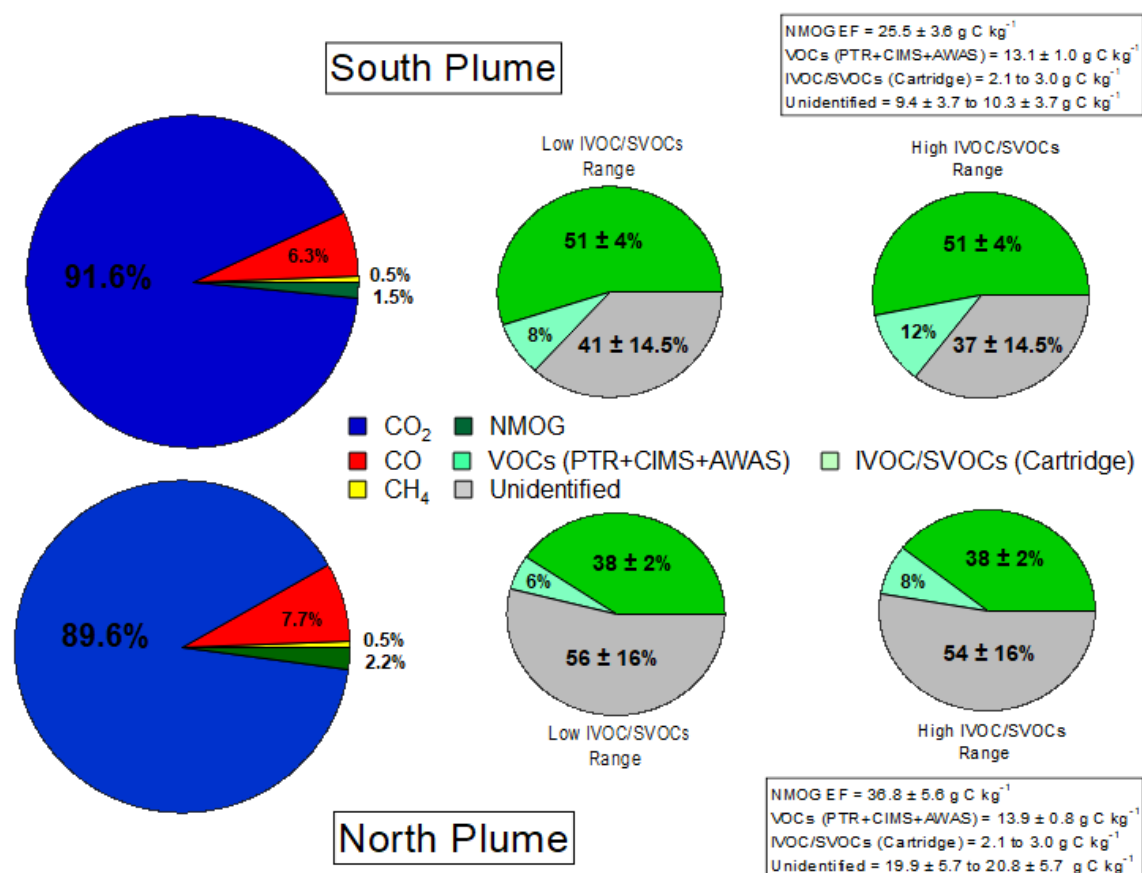

545

546 Figure S108. Percent contributions of carbon-containing compounds to the TC based on EFs (in terms of  
 547 carbon fraction) for the SP and NP. The two pie charts on the right, representing the low and high  
 548 I/SVOC EF estimates, show the percent breakdown of the measured NMOGs and the remaining  
 549 unidentified portion. The EF values (g C kg<sup>-1</sup>) are identified in the boxes. Note, the I/SVOC  
 550 measurements represent the integrated average encompassing both plumes.

551

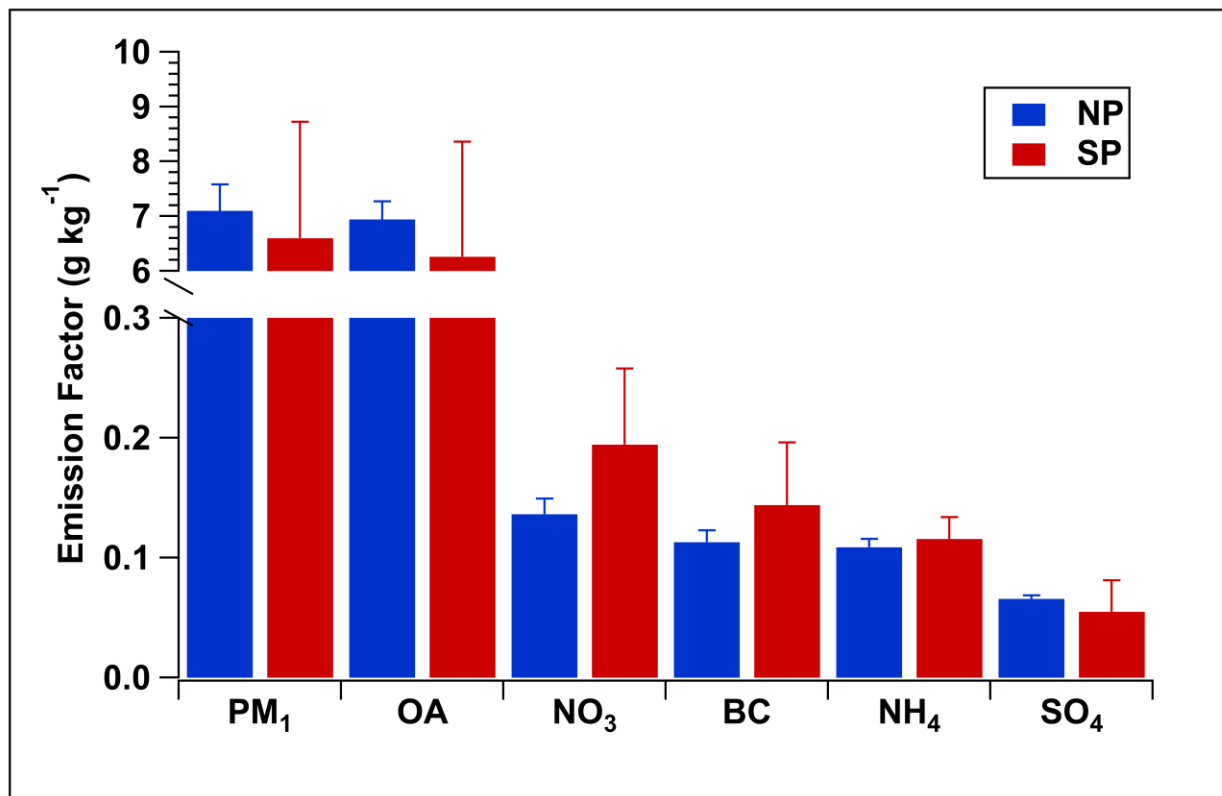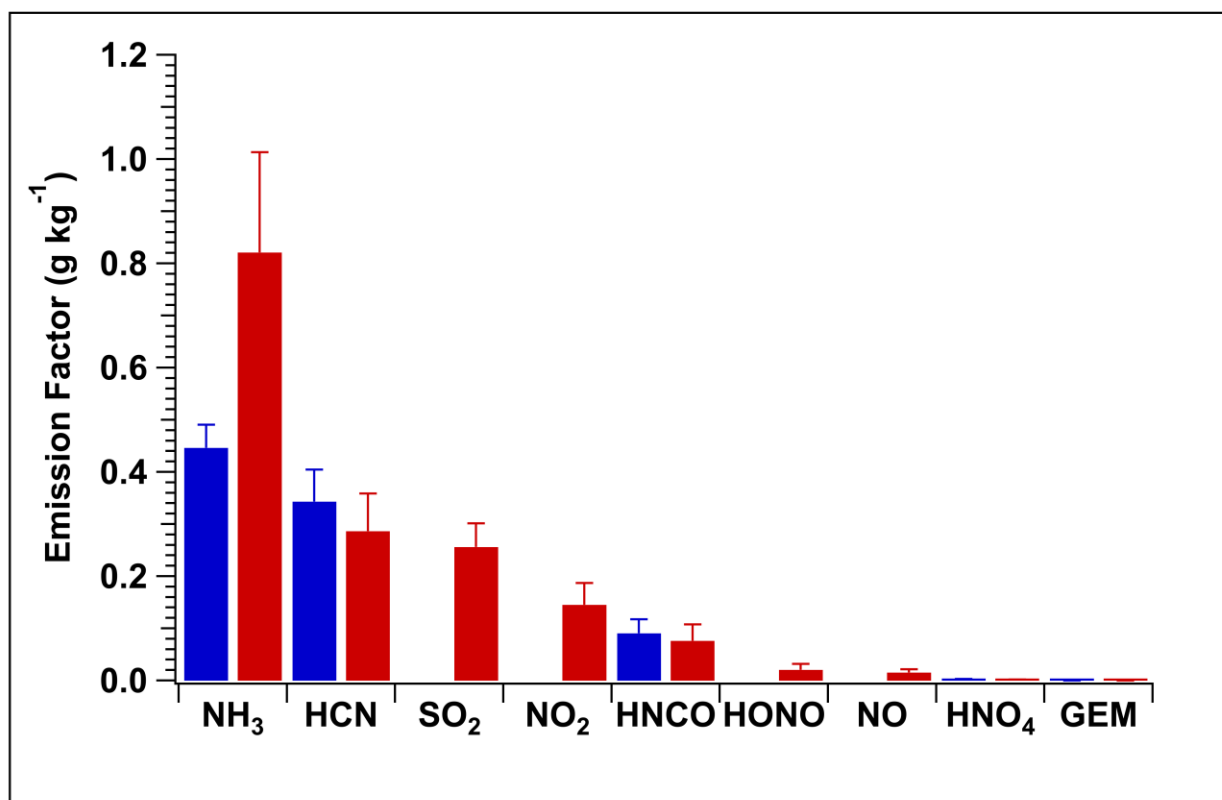

552  
 553 Figure S119. Emission factors (EF) (g kg<sup>-1</sup>) for the SP and NP determined from measurements of a)  
 554 particle species; and b) inorganic gas-phase species.

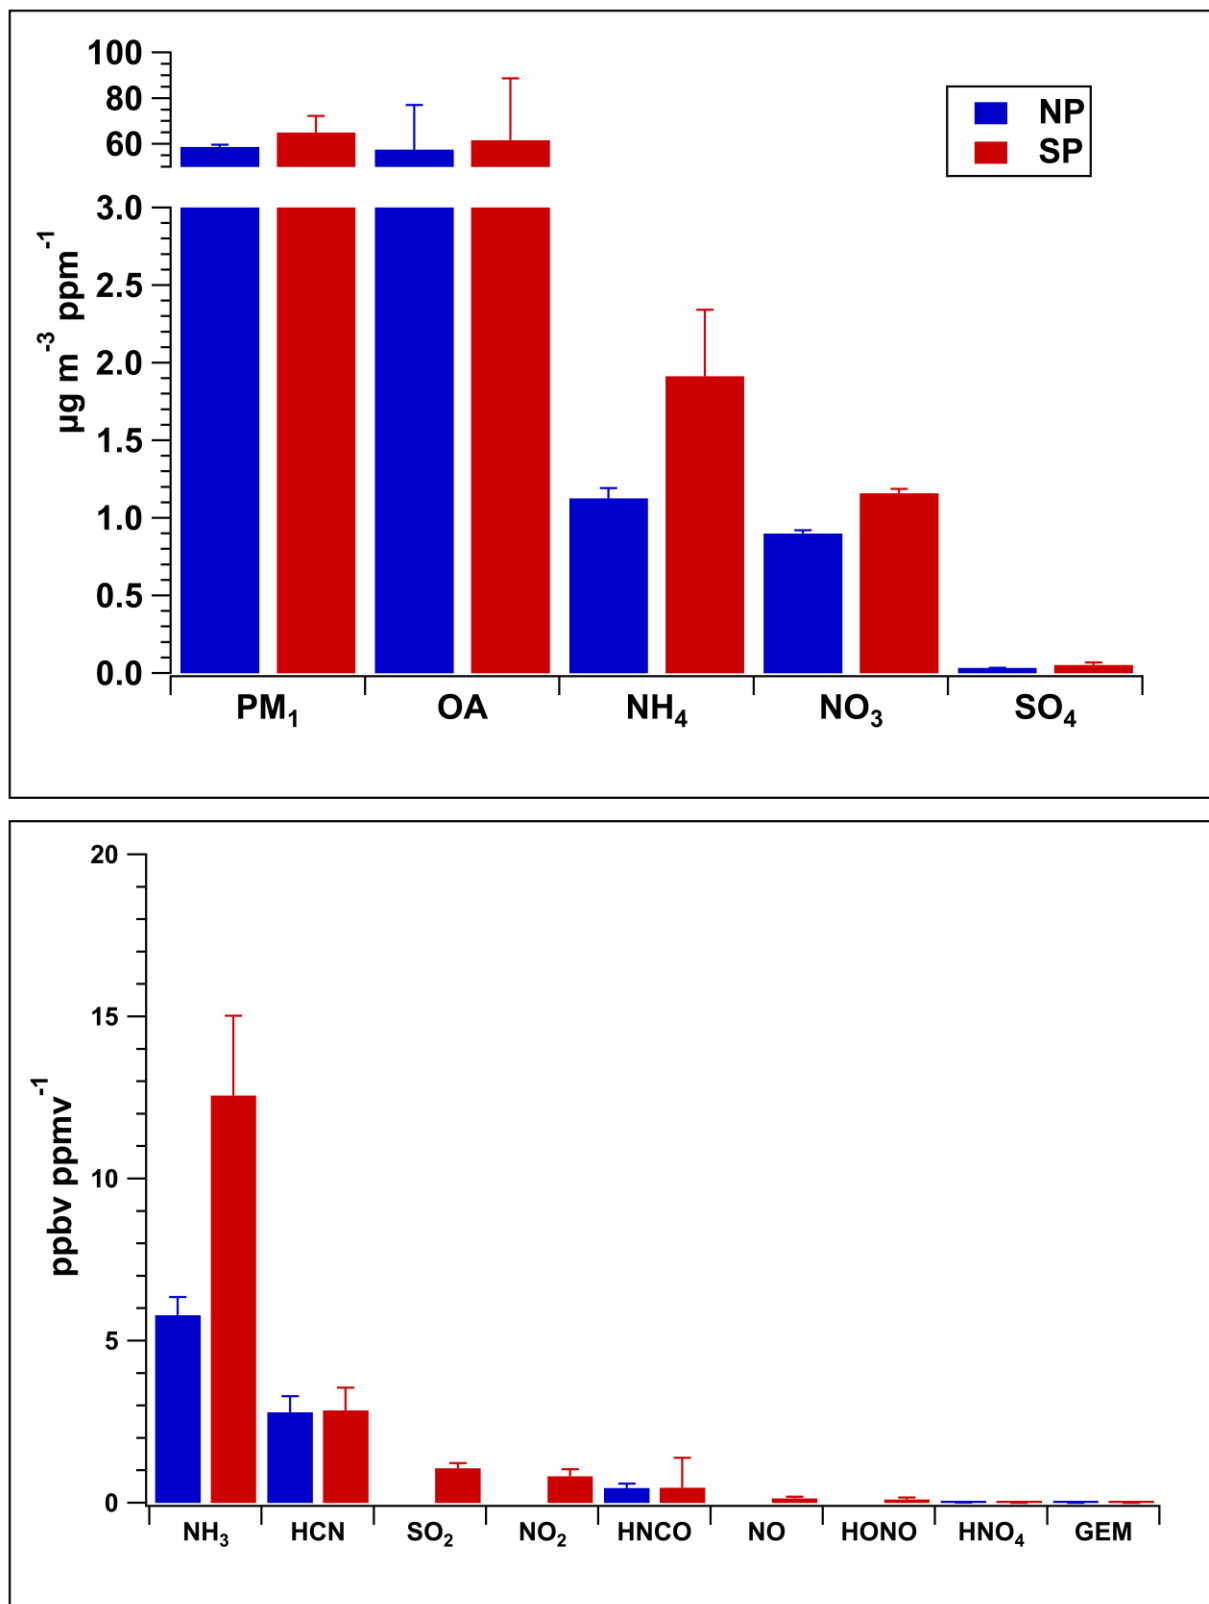

555  
 556 Figure S120. Emission ratios (ER) for the SP and NP determined from measurements of a) particle  
 557 species ( $\mu\text{g m}^{-3} \text{ ppm}^{-1}$ ); and b) inorganic gas-phase species ( $\text{ppbv ppm}^{-1}$ ).

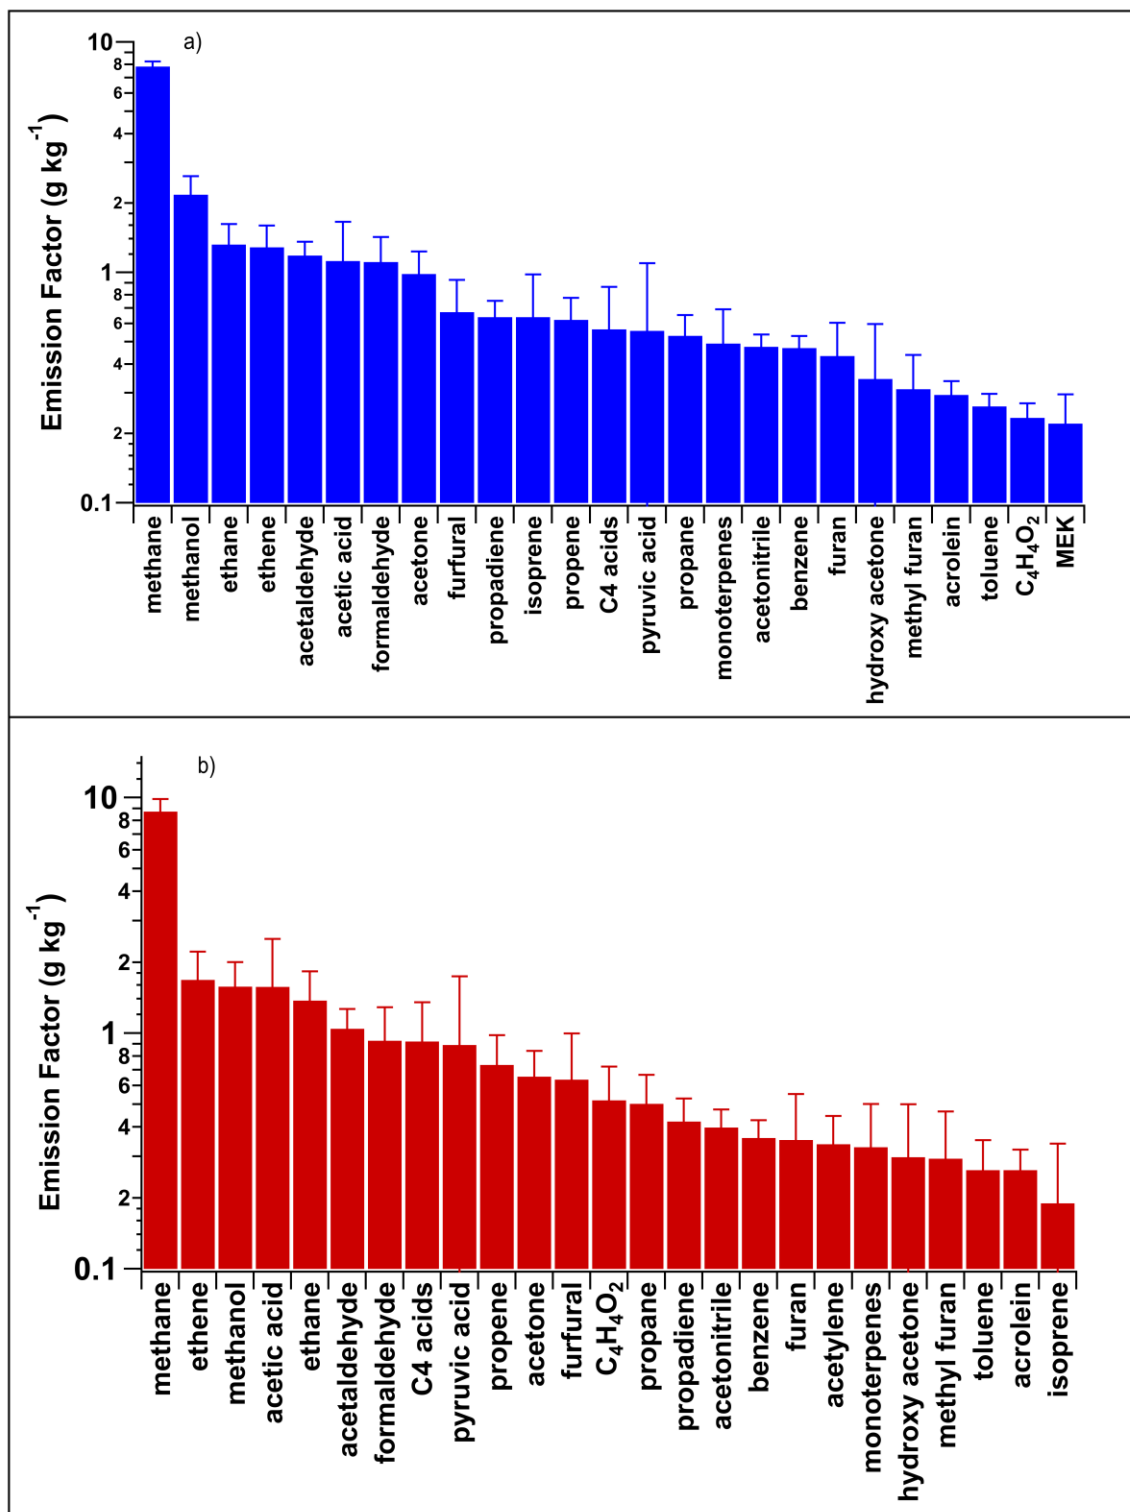

Figure S134. Emission factors (EF) (g kg<sup>-1</sup>) for the a) NP and b) SP for the top 25 measured gas-phase organic species. ~~C5 acids = C5 oxo-carboxylic acids~~, C4 acids = C4 oxo-carboxylic acids, propadiene = fragments/propadiene, hydroxy acetone = hydroxy acetone/ ethyl formate; MEK = MEK, butanal and 2-methylpropanal .

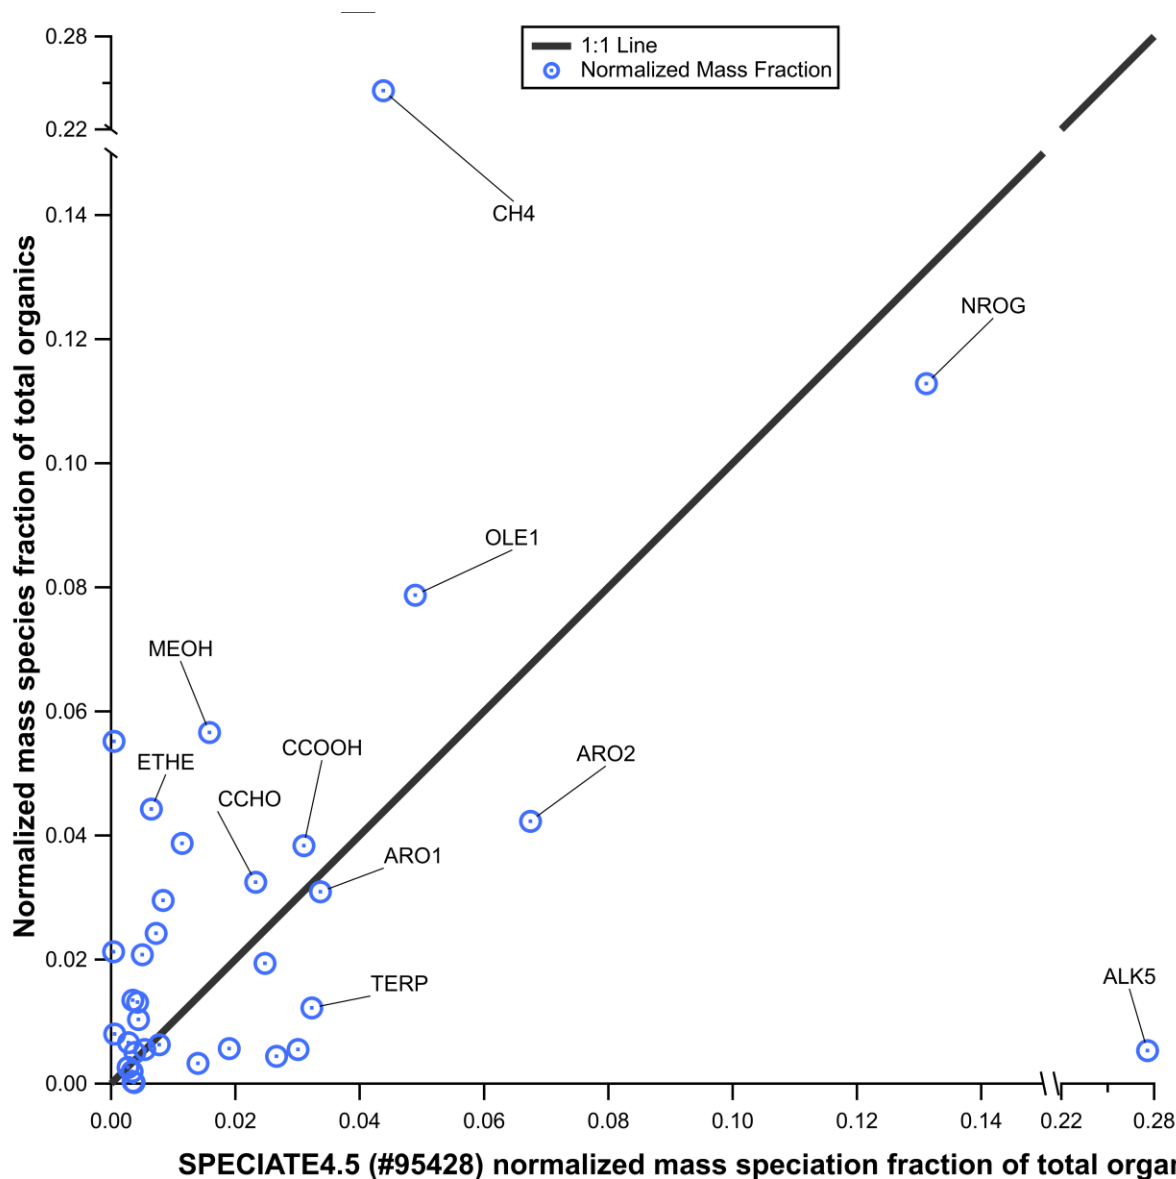

Figure S142. Comparison of the normalized organic gas speciation profile derived from this study (Hayden et al.) with that from the EPA's SPECIATE4.5 (#95428) profile. used by the SAPRC-11 mechanism (SPECIATE4.5#95428). EFs in the present study were mapped to the SAPRC-11 model mechanism species and normalized to the NMOG<sub>total organic gas</sub> (which does not includes the unidentified mass fraction), to create the a total organic gas mass speciation profile. The normalized model-species-fraction-total organic mass speciation profile is plotted against the similarly treated mass speciation profile from the EPA SPECIATEv4.5 #95428 for wildfire smoldering emissions. Note that for comparison purposes the non-standard SAPRC-11 species in the present study are lumped, such that SESQ is summed with TERP, and IVOC, WSOC and NVOL are summed with NROG.

## References

- Akagi, S. K., Yokelson, R. J., Wiedinmyer, C., Alvarado, M. J., Reid, J. S., Karl, T., Crounse, J. D., and Wennberg, P. O.: Emission factors for open and domestic biomass burning for use in atmospheric models, *Atmos. Chem. Phys.*, 11, 4039-4072, <https://doi.org/10.5194/acp-11-4039-2011>, 2011.
- Allan, J. D., Jimenez, J. L., Williams, P. I., Alfarra, M. R., Bower, K. N., Jayne, J. T., Coe, H., and Worsnop, D. R.: Quantitative sampling using an Aerodyne Aerosol Mass Spectrometer 1. Techniques of data interpretation and error analysis, *J. Geophys. Res.-Atmos*, 108, 4090, <https://doi.org/10.1029/2002JD002358>, 2003.
- Andreae, M. O. and Merlet, P.: Emission of trace gases and aerosols from biomass burning, *Global Biogeochem. Cy.*, 15, 955-966, <https://doi.org/10.1029/2000GB001382>, 2001.
- Andreae, M. O.: Emission of trace gases and aerosols from biomass burning – an updated assessment, *Atmos. Chem. Phys.*, 19, 8523-8546, <https://doi.org/10.5194/acp-19-8523-2019>, 2019. Biomass burning emission factors [https://edmond.mpdl.mpg.de/imeji/collection/op2vVE8m0us\\_gcGC](https://edmond.mpdl.mpg.de/imeji/collection/op2vVE8m0us_gcGC), ver 14 Apr 2021.
- Baray, S., Darlington, A., Gordon, M., Hayden, K. L., Leithead, A., Li, S. M., Liu, P. S. K., Mittermeier, R. L., Moussa, S. G., O'Brien, J., Staebler, R., Wolde, M., Worthy, D., and McLaren, R.: Quantification of methane sources in the Athabasca Oil Sands Region of Alberta by aircraft mass balance, *Atmos. Chem. Phys.*, 18, 7361-7378, <https://doi.org/10.5194/acp-18-7361-2018>, 2018.
- Baumgardner, D., Kok, G., and Raga, G.: Warming of the Arctic lower stratosphere by light absorbing particles, *Geophys. Res. Lett.*, 31, L06117, <https://doi.org/10.1029/2003GL018883>, 2004.
- Bertschi, I., Yokelson, R. J., Ward, D. E., Babbitt, R. E., Susott, R. A., Goode, J. G., and Hao, W. M.: Trace gas and particle emissions from fires in large diameter and belowground biomass fuels, *J. Geophys. Res.-Atmos*, 108, 8472, <https://doi.org/10.1029/2002JD002100>, 2003.
- Cai, Y., Montague, D. C., Mooiweer-Bryan, W., and Deshler, T.: Performance characteristics of the ultra high sensitivity aerosol spectrometer for particles between 55 and 800nm: Laboratory and field studies, *J. Aerosol Sci.*, 39, 759-769, <https://doi.org/10.1016/j.jaerosci.2008.04.007>, 2008.
- Clyne, M. A. A., Thrush, B. A., and Wayne, R. P.: Kinetics of the chemiluminescent reaction between nitric oxide and ozone, *Trans. Faraday Soc.*, 60, 359-370, <https://doi.org/10.1039/TF9646000359>, 1964.
- Cole, A. S., Steffen, A., Eckley, C. S., Narayan, J., Pilote, M., Tordon, R., Graydon, J. A., St. Louis, V. L., Xu, X., and Branfireun, B. A.: A survey of mercury in air and precipitation across Canada: Patterns and trends, *Atmosphere*, 5, 635-668, <https://doi.org/10.3390/atmos5030635>, 2014.
- DeCarlo, P. F., Dunlea, E. J., Kimmel, J. R., Aiken, A. C., Sueper, D., Crounse, J., Wennberg, P. O., Emmons, L., Shinozuka, Y., Clarke, A., Zhou, J., Tomlinson, J., Collins, D. R., Knapp, D., Weinheimer, A. J., Montzka, D. D., Campos, T., and Jimenez, J. L.: Fast airborne aerosol size and chemistry measurements above Mexico City and Central Mexico during the MILAGRO campaign, *Atmos. Chem. Phys.*, 8, 4027-4048, <https://doi.org/10.5194/acp-8-4027-2008>, 2008.
- Ditto, J. C., He, M., Hass-Mitchell, T. N., Moussa, S. G., Hayden, K., Li, S. M., Liggio, J., Leithead, A., Lee, P., Wheeler, M. J., Wentzell, J. J. B., and Gentner, D. R.: Atmospheric evolution of emissions from a



616 boreal forest fire: the formation of highly functionalized oxygen-, nitrogen-, and sulfur-containing organic  
 617 compounds, *Atmos. Chem. Phys.*, 21, 255-267, <https://doi.org/10.5194/acp-21-255-2021>, 2021.

618 Drewnick, F., Schwab, J. J., Jayne, J. T., Canagaratna, M., Worsnop, D. R., and Demerjian, K. L.:  
 619 Measurement of ambient aerosol composition during the PMTACS-NY 2001 using an aerosol mass  
 620 spectrometer. Part I: Mass concentrations special issue of aerosol science and technology on findings  
 621 from the Fine Particulate Matter Supersites Program, *Aerosol Sci. Tech.*, 38, 92-103,  
 622 <https://doi.org/10.1080/02786820390229507>, 2004.

623 Dunlea, E. J., DeCarlo, P. F., Aiken, A. C., Kimmel, J. R., Peltier, R. E., Weber, R. J., Tomlinson, J.,  
 624 Collins, D. R., Shinozuka, Y., McNaughton, C. S., Howell, S. G., Clarke, A. D., Emmons, L. K., Apel, E.  
 625 C., Pfister, G. G., van Donkelaar, A., Martin, R. V., Millet, D. B., Heald, C. L., and Jimenez, J. L.:  
 626 Evolution of Asian aerosols during transpacific transport in INTEX-B, *Atmos. Chem. Phys.*, 9, 7257-  
 627 7287, <https://doi.org/10.5194/acp-9-7257-2009>, 2009.

628 Fehsenfeld, F. C., Dickerson, R. R., Hübler, G., Luke, W. T., Nunnermacker, L. J., Williams, E. J.,  
 629 Roberts, J. M., Calvert, J. G., Curran, C. M., Delany, A. C., Eubank, C. S., Fahey, D. W., Fried, A.,  
 630 Gandrud, B. W., Langford, A. O., Murphy, P. C., Norton, R. B., Pickering, K. E., and Ridley, B. A.: A  
 631 ground-based intercomparison of NO, NO<sub>x</sub>, and NO<sub>y</sub> measurement techniques, *J. Geophys. Res.-Atmos.*,  
 632 92, 14710-14722, <https://doi.org/10.1029/JD092iD12p14710>, 1987.

633 Gordon, M., Li, S. M., Staebler, R., Darlington, A., Hayden, K., O'Brien, J., and Wolde, M.: Determining  
 634 air pollutant emission rates based on mass balance using airborne measurement data over the Alberta oil  
 635 sands operations, *Atmos. Meas. Tech.*, 8, 3745-3765, <https://doi.org/10.5194/amt-8-3745-2015>, 2015.  
 636

637 Hatch, L. E., Yokelson, R. J., Stockwell, C. E., Veres, P. R., Simpson, I. J., Blake, D. R., Orlando, J. J.,  
 638 and Barsanti, K. C.: Multi-instrument comparison and compilation of non-methane organic gas emissions  
 639 from biomass burning and implications for smoke-derived secondary organic aerosol precursors, *Atmos.*  
 640 *Chem. Phys.*, 17, 1471-1489, <https://doi.org/10.5194/acp-17-1471-2017>, 2017.

641 Hayden, K.L., Li, S.M. Makar, P., Liggio, J., Moussa, S.G., Akingunola, A., McLaren, R., Staebler, R.M.,  
 642 Darlington, A. , O'Brien, J., Zhang, J., Wolde, M., and Zhang, L.: New methodology shows short  
 643 atmospheric lifetimes of oxidized sulfur and nitrogen due to dry deposition, *Atmos. Chem. Phys.*, 21,  
 644 8377-8392, <https://doi.org/10.5194/acp-21-8377-2021>, 2021.

645 Jimenez, J. L., Jayne, J. T., Shi, Q., Kolb, C. E., Worsnop, D. R., Yourshaw, I., Seinfeld, J. H., Flagan, R.  
 646 C., Zhang, X., Smith, K. A., Morris, J. W., and Davidovits, P.: Ambient aerosol sampling using the  
 647 Aerodyne Aerosol Mass Spectrometer, *J. Geophys. Res.-Atmos.*, 108, 8425,  
 648 <https://doi.org/10.1029/2001JD001213>, 2003.

649 Khare, P., Marcotte, A., Sheu, R., Walsh, A. N., Ditto, J. C., and Gentner, D. R.: Advances in offline  
 650 approaches for trace measurements of complex organic compound mixtures via soft ionization and high-  
 651 resolution tandem mass spectrometry, *J. Chromatogr. A*, 1598, 163-  
 652 174, <https://doi.org/10.1016/j.chroma.2019.03.037>, 2019.

653 Kleinman, L. I., Springston, S. R., Daum, P. H., Lee, Y. N., Nunnermacker, L. J., Senum, G. I., Wang, J.,  
 654 Weinstein-Lloyd, J., Alexander, M. L., Hubbe, J., Ortega, J., Canagaratna, M. R., and Jayne, J.: The time  
 655 evolution of aerosol composition over the Mexico City plateau, *Atmos. Chem. Phys.*, 8, 1559-1575,  
 656 <https://doi.org/10.5194/acp-8-1559-2008>, 2008.

657 Koss, A. R., Sekimoto, K., Gilman, J. B., Selimovic, V., Coggon, M. M., Zarzana, K. J., Yuan, B.,  
658 Lerner, B. M., Brown, S. S., Jimenez, J. L., Krechmer, J., Roberts, J. M., Warneke, C., Yokelson, R. J.,  
659 and de Gouw, J.: Non-methane organic gas emissions from biomass burning: identification,  
660 quantification, and emission factors from PTR-ToF during the FIREX 2016 laboratory experiment,  
661 *Atmos. Chem. Phys.*, 18, 3299-3319, <https://doi.org/10.5194/acp-18-3299-2018>, 2018.

662 Kupc, A., Williamson, C., Wagner, N. L., Richardson, M., and Brock, C. A.: Modification, calibration,  
663 and performance of the Ultra-High Sensitivity Aerosol Spectrometer for particle size distribution and  
664 volatility measurements during the Atmospheric Tomography Mission (ATom) airborne campaign,  
665 *Atmos. Meas. Tech.*, 11, 369-383, <https://doi.org/10.5194/amt-11-369-2018>, 2018.

666 Lee, B. H., Lopez-Hilfiker, F. D., Mohr, C., Kurtén, T., Worsnop, D. R., and Thornton, J. A.: An Iodide-  
667 Adduct High-Resolution Time-of-Flight Chemical-Ionization Mass Spectrometer: Application to  
668 Atmospheric Inorganic and Organic Compounds, *Environmental Science & Technology*, 48, 6309-6317,  
669 10.1021/es500362a, 2014.

670 Lee, B. H., Lopez-Hilfiker, F. D., Veres, P. R., McDuffie, E. E., Fibiger, D. L., Sparks, T. L., Ebben, C.  
671 J., Green, J. R., Schroder, J. C., Campuzano-Jost, P., Iyer, S., D'Ambro, E. L., Schobesberger, S., Brown,  
672 S. S., Wooldridge, P. J., Cohen, R. C., Fiddler, M. N., Bililign, S., Jimenez, J. L., Kurtén, T., Weinheimer,  
673 A. J., Jaegle, L., and Thornton, J. A.: Flight Deployment of a High-Resolution Time-of-Flight Chemical  
674 Ionization Mass Spectrometer: Observations of Reactive Halogen and Nitrogen Oxide Species, *Journal of*  
675 *Geophysical Research: Atmospheres*, 123, 7670-7686, <https://doi.org/10.1029/2017JD028082>, 2018.

676 Leifer, I., Melton, C. Tratt, D.M., Buckland, K.N., Clarisse, L., Coheur, P., Frash, J., Gupta, M., Johnson,  
677 P.D., Leen, J.B., Van Damme, M., Whitburn, S., and Yurganov, L.: Remote sensing and in situ  
678 measurements of methane and ammonia emissions from a megacity dairy complex: Chino, CA, *Environ.*  
679 *Poll.*, 221, 37-51, <https://doi.org/10.1016/j.envpol.2016.09.083>, 2017.

680 Lerner, B. M., Gilman, J. B., Aikin, K. C., Atlas, E. L., Goldan, P. D., Graus, M., Hendershot, R.,  
681 Isaacman-VanWertz, G. A., Koss, A., Kuster, W. C., Lueb, R. A., McLaughlin, R. J., Peischl, J., Sueper,  
682 D., Ryerson, T. B., Tokarek, T. W., Warneke, C., Yuan, B., and de Gouw, J. A.: An improved, automated  
683 whole air sampler and gas chromatography mass spectrometry analysis system for volatile organic  
684 compounds in the atmosphere, *Atmos. Meas. Tech.*, 10, 291-313, [https://doi.org/10.5194/amt-10-291-](https://doi.org/10.5194/amt-10-291-2017)  
685 2017, 2017.

686 Li, S.-M., Leithead, A., Moussa, S. G., Liggio, J., Moran, M. D., Wang, D., Hayden, K., Darlington, A.,  
687 Gordon, M., Staebler, R., Makar, P. A., Stroud, C. A., McLaren, R., Liu, P. S. K., O'Brien, J.,  
688 Mittermeier, R. L., Zhang, J., Marson, G., Cober, S. G., Wolde, M., and Wentzell, J. J. B.: Differences  
689 between measured and reported volatile organic compound emissions from oil sands facilities in Alberta,  
690 *Canada, P. Natl. Acad. Sci. USA*, 114, E3756-E3765, <https://doi.org/10.1073/pnas.1617862114>, 2017.

691 Li, K., Liggio, J., Han, C., Liu, Q., Moussa, S. G., Lee, P., and Li, S.-M.: Understanding the impact of  
692 high-NO<sub>x</sub> conditions on the formation of secondary organic aerosol in the photooxidation of oil sand-  
693 related precursors, *Environ. Sci. Technol.*, 53, 14420-14429, <https://doi.org/10.1021/acs.est.9b05404>,  
694 2019.

695  
696 Li, K., Wentzell, J. J. B., Liu, Q., Leithead, A., Moussa, S. G., Wheeler, M. J., Han, C., Lee, P., Li, S.-M.,  
697 and Liggio, J.: Evolution of atmospheric total organic carbon from petrochemical mixtures, *Environ. Sci.*  
698 *Technol.*, 55, 12841-12851, <https://doi.org/10.1021/acs.est.1c02620>, 2021.

699

700 Liggio, J., Stroud, C. A., Wentzell, J. J. B., Zhang, J., Sommers, J., Darlington, A., Liu, P. S. K., Moussa,  
 701 S. G., Leithead, A., Hayden, K., Mittermeier, R. L., Staebler, R., Wolde, M., and Li, S.-M.: Quantifying  
 702 the Primary Emissions and Photochemical Formation of Isocyanic Acid Downwind of Oil Sands  
 703 Operations, *Environmental Science & Technology*, 51, 14462-14471, 10.1021/acs.est.7b04346, 2017.

704 McGee, T.K.: Evacuating First Nations during wildfires in Canada, *Fire Safety Journ.*, 120,  
 705 <https://doi.org/10.1016/j.firesaf.2020.103120>, 2020.

706 McLagan, D. S., Stupple, G. W., Darlington, A., Hayden, K., and Steffen, A.: Where there is smoke there  
 707 is mercury: Assessing boreal forest fire mercury emissions using aircraft and highlighting uncertainties  
 708 associated with upscaling emissions estimates, *Atmos. Chem. Phys.*, 21, 5635-5653,  
 709 <https://doi.org/10.5194/acp-21-5635-2021>, 2021.

710 Middlebrook, A. M., Bahreini, R., Jimenez, J. L., and Canagaratna, M. R.: Evaluation of composition-  
 711 dependent collection efficiencies for the aerodyne aerosol mass spectrometer using field data, *Aerosol*  
 712 *Sci. Tech.*, 46, 258-271, <https://doi.org/10.1080/02786826.2011.620041>, 2012.

713 Mungall, E. L., Abbatt, J. P. D., Wentzell, J. J. B., Lee, A. K. Y., Thomas, J. L., Blais, M., Gosselin, M.,  
 714 Miller, L. A., Papakyriakou, T., Willis, M. D., and Liggio, J.: Microlayer source of oxygenated volatile  
 715 organic compounds in the summertime marine Arctic boundary layer, *Proceedings of the National*  
 716 *Academy of Sciences of the United States of America*, 114, 6203-6208, 10.1073/pnas.1620571114, 2017.

717 Neuman, J. A., Huey, L. G., Ryerson, T. B., and Fahey, D. W.: Study of Inlet Materials for Sampling  
 718 Atmospheric Nitric Acid, *Environmental Science & Technology*, 33, 1133-1136, 10.1021/es980767f,  
 719 1999.

720 Penkett, S., Gilge, S., Plass-Duelmer, C., Galbally, I., Brough, N., Bottenheim, J., Flocke, F., Gerwig, H.,  
 721 Lee, J., Milton, M., Rohrer, F., Ryerson, T., Steinbacher, M., Torseth, K., and Wielgosz, R.: WMO/GAW  
 722 expert workshop on global long-term measurements of nitrogen oxides and recommendations for GAW  
 723 nitrogen oxides network, World Meteorological Organization, Hohenpeissenberg, Germany, 2011.

724  
 725 Permar, W., Wang, Q., Selimovic, V., Wielgasz, C., Yokelson, R. J., Hornbrook, R. S., Hills, A. J., Apel,  
 726 E. C., Ku, I.-T., Zhou, Y., Sive, B. C., Sullivan, A. P., Collett Jr, J. L., Campos, T. L., Palm, B. B., Peng,  
 727 Q., Thornton, J. A., Garofalo, L. A., Farmer, D. K., Kreidenweis, S. M., Levin, E. J. T., DeMott, P. J.,  
 728 Flocke, F., Fischer, E. V., and Hu, L.: Emissions of trace organic gases from western U.S. wildfires based  
 729 on WE-CAN aircraft measurements, *J. Geophys. Res.-Atmos.*, 126, e2020JD033838,  
 730 <https://doi.org/10.1029/2020JD033838>, 2021.

731 Quinn, P. K., Bates, T. S., Coffman, D., Onasch, T. B., Worsnop, D., Baynard, T., de Gouw, J. A.,  
 732 Goldan, P. D., Kuster, W. C., Williams, E., Roberts, J. M., Lerner, B., Stohl, A., Pettersson, A., and  
 733 Lovejoy, E. R.: Impacts of sources and aging on submicrometer aerosol properties in the marine boundary  
 734 layer across the Gulf of Maine, *J. Geophys. Res.-Atmos.*, 111, D23S36,  
 735 <https://doi.org/10.1029/2006JD007582>, 2006.

736 Reid, J. S., and Hobbs, P. V.: Physical and optical properties of young smoke from individual biomass  
 737 fires in Brazil, *J. Geophys. Res.-Atmos.*, 103, 32013-32030, 10.1029/98jd00159, 1998.

738 Reid, J. S., Koppmann, R., Eck, T. F., and Eleuterio, D. P.: A review of biomass burning emissions part  
 739 II: intensive physical properties of biomass burning particles, *Atmos. Chem. Phys.*, 5, 799-825,  
 740 10.5194/acp-5-799-2005, 2005.

741 Ridley, B. A. and Grahek, F. E.: A small, low flow, high sensitivity reaction vessel for NO  
 742 chemiluminescence detectors, *J. Atmos. Ocean. Tech.*, 7, 307-311, [https://doi.org/10.1175/1520-0426\(1990\)007<0307:Aslfs>2.0.Co;2](https://doi.org/10.1175/1520-0426(1990)007<0307:Aslfs>2.0.Co;2), 1990.  
 743  
 744 Roberts, J. M., Veres, P., Warneke, C., Neuman, J. A., Washenfelder, R. A., Brown, S. S., Baasandorj,  
 745 M., Burkholder, J. B., Burling, I. R., Johnson, T. J., Yokelson, R. J., and De Gouw, J.: Measurement of  
 746 HONO, HNCO, and other inorganic acids by negative-ion proton-transfer chemical-ionization mass  
 747 spectrometry (NI-PT-CIMS): Application to biomass burning emissions, *Atmospheric Measurement*  
 748 *Techniques*, 3, 981-990, 10.5194/amt-3-981-2010.  
 749 Schwarz, J. P., Gao, R. S., Fahey, D. W., Thomson, D. S., Watts, L. A., Wilson, J. C., Reeves, J. M.,  
 750 Darbeheshti, M., Baumgardner, D. G., Kok, G. L., Chung, S. H., Schulz, M., Hendricks, J., Lauer, A.,  
 751 Kärcher, B., Slowik, J. G., Rosenlof, K. H., Thompson, T. L., Langford, A. O., Loewenstein, M., and  
 752 Aikin, K. C.: Single-particle measurements of midlatitude black carbon and light-scattering aerosols from  
 753 the boundary layer to the lower stratosphere, *J. Geophys. Res.-Atmos*, 111, D16207,  
 754 <https://doi.org/10.1029/2006JD007076>, 2006.  
 755 Sekimoto, K., Li, S.-M., Yuan, B., Koss, A., Coggon, M., Warneke, C., and de Gouw, J.: Calculation of  
 756 the sensitivity of proton-transfer-reaction mass spectrometry (PTR-MS) for organic trace gases using  
 757 molecular properties, *Int. J. Mass Spectrom.*, 421, 71-94, <https://doi.org/10.1016/j.ijms.2017.04.006>,  
 758 2017.  
 759 Selimovic, V., Yokelson, R. J., McMeeking, G. R., and Coe field, S.: In situ measurements of trace gases,  
 760 PM, and aerosol optical properties during the 2017 NW US wildfire smoke event, *Atmos. Chem. Phys.*,  
 761 19, 3905-3926, <https://doi.org/10.5194/acp-19-3905-2019>, 2019.  
 762 Sheu, R., Marcotte, A., Khare, P., Charan, S., Ditto, J. C., and Gentner, D. R.: Advances in offline  
 763 approaches for chemically speciated measurements of trace gas-phase organic compounds via adsorbent  
 764 tubes in an integrated sampling-to-analysis system, *J. Chromatogr. A*, 1575, 80-  
 765 90, <https://doi.org/10.1016/j.chroma.2018.09.014>, 2018.  
 766 Stecher III, H. A., Luther III, G. W., MacTaggart, D. L., Farwell, S. O., Crosley, D. R., Dorko, W. D.,  
 767 Goldan, P. D., Beltz, N., Krischke, U., Luke, W. T., Thornton, D. C., Talbot, R. W., Lefer, B. L., Scheuer,  
 768 E. M., Benner, R. L., Wu, J., Saltzman, E. S., Gallagher, M. S., and Ferek, R. J.: Results of the Gas-Phase  
 769 Sulfur Intercomparison Experiment (GASIE): Overview of experimental setup, results and general  
 770 conclusions, *J. Geophys. Res.-Atmos*, 102, 16219-16236, <https://doi.org/10.1029/97JD01362>, 1997.  
 771 Stephens, M., Turner, N., and Sandberg, J.: Particle identification by laser-induced incandescence in a  
 772 solid-state laser cavity, *Appl. Optics*, 42, 3726-3736, <https://doi.org/10.1364/ao.42.003726>, 2003.  
 773 Stockwell, C. E., Kupc, A., Witkowski, B., Talukdar, R. K., Liu, Y., Selimovic, V., Zarzana, K. J.,  
 774 Sekimoto, K., Warneke, C., Washenfelder, R. A., Yokelson, R. J., Middlebrook, A. M., and Roberts, J.  
 775 M.: Characterization of a catalyst-based conversion technique to measure total particulate nitrogen and  
 776 organic carbon and comparison to a particle mass measurement instrument, *Atmos. Meas. Tech.*, 11,  
 777 2749-2768, 10.5194/amt-11-2749-2018, 2018.  
 778 Veres, P. R., and Roberts, J. M.: Development of a photochemical source for the production and  
 779 calibration of acyl peroxyxynitrate compounds, *Atmos. Meas. Tech.*, 8, 2225-2231, 10.5194/amt-8-2225-  
 780 2015, 2015.  
 781 Veres, P., Roberts, J. M., Burling, I. R., Warneke, C., de Gouw, J., and Yokelson, R. J.: Measurements of  
 782 gas-phase inorganic and organic acids from biomass fires by negative-ion proton-transfer chemical-

783 ionization mass spectrometry, J. Geophys. Res.-Atmos, 115, D23302,  
784 <https://doi.org/10.1029/2010JD014033>, 2010.

785 Ward, D. E. and Radke, L. F.: Emissions measurements from vegetation fires: A comparative evaluation  
786 of methods and results, in: Fire in the Environment: The Ecological, Atmospheric, and Climatic  
787 Importance of Vegetation Fires. Dahlem Workshop Reports: Environmental Sciences Research Report  
788 13, edited by: Crutzen, P. J., and Goldammer, J. G., John Wiley & Sons, Chichester, England, 53-76,  
789 1993.

790 Williams, E. J., Baumann, K., Roberts, J. M., Bertman, S. B., Norton, R. B., Fehsenfeld, F. C.,  
791 Springston, S. R., Nunnermacker, L. J., Newman, L., Olszyna, K., Meagher, J., Hartsell, B., Edgerton, E.,  
792 Pearson, J. R., and Rodgers, M. O.: Intercomparison of ground-based NO<sub>y</sub> measurement techniques, J.  
793 Geophys. Res.-Atmos, 103, 22261-22280, <https://doi.org/10.1029/98JD00074>, 1998.

794

795

796

797
