# Supplementary material for: Reconciling the total carbon budget for boreal forest wildfire emissions using airborne observations
Source: Copernicus journal article supplement (doi:10.5194/acp-2022-245), 2022-04-14
Supplement: Supplementary file 5 [file acp-2022-245-supplement.pdf]

1 **Supplementary Information**

2 Reconciling the total carbon budget for boreal forest wildfire emissions using airborne observations

3

4 Katherine L. Hayden<sup>1\*</sup>, Shao-Meng Li<sup>2</sup>, John Liggio<sup>1</sup>, Michael J. Wheeler<sup>1</sup>, Jeremy J.B. Wentzell<sup>1</sup>, Amy  
5 Leithead<sup>1</sup>, Peter Brickell<sup>1</sup>, Richard L. Mittermeier<sup>1</sup>, Zachary Oldham<sup>1,6</sup>, Cris Mihele<sup>1</sup>, Ralf M. Staebler<sup>1</sup>,  
6 Samar G. Moussa<sup>1</sup>, Andrea Darlington<sup>1</sup>, Alexandra Steffen<sup>1</sup>, Mengistu Wolde<sup>3</sup>, Daniel Thompson<sup>4</sup>, Jack  
7 Chen<sup>1</sup>, Debora Griffin<sup>1</sup>, Ellen Eckert<sup>1</sup>, Jenna C. Ditto<sup>5</sup>, Megan He<sup>5</sup> and Drew R. Gentner<sup>5</sup>

8 [1]{Air Quality Research Division, Environment Canada, Toronto, ON, Canada}

9 [2]{College of Environmental Sciences and Engineering, Peking University, Beijing, China}

10 [3]{National Research Council of Canada, Ottawa, ON, Canada}

11 [4]{Canadian Forest Service, Natural Resources Canada, Edmonton, ON, Canada}

12 [5]{Yale University, New Haven, CT, USA}

13 [6]{University of Waterloo, Waterloo, ON, Canada}

14

15 \*Correspondence to: Katherine Hayden (katherine.hayden@ec.gc.ca)

16

17 **2.0 Methods**

18 **2.1 Aircraft measurements**

19 Table S1 provides a summary of the measurements with associated instrumentation, technical details and  
20 related references.

21 **2.1.1 Trace gas measurements**

22 All of the trace gas instrumentation except NH<sub>3</sub> and the CIMS were sampled through PTFE tubing from a  
23 main aircraft roof hatch that contained multiple inlet ports through which rear-facing tubing was mounted.

24 **NO, NO<sub>2</sub>, NO<sub>y</sub>, SO<sub>2</sub> and GEM** These measurements were made using modified commercial instruments  
25 (Thermo Scientific Inc. and Tekran Instruments Corp.). NO and SO<sub>2</sub> were directly measured: NO by  
26 chemiluminescence with excess ozone using a 42i TL instrument operated in single mode, while SO<sub>2</sub> was

27 measured by pulsed fluorescence with a 43i TL instrument. A photolytic converter (Air Quality Design  
28 Inc.) was used to selectively convert a large fraction of NO<sub>2</sub> to NO. The sum of this NO<sub>2</sub> fraction that  
29 was converted to NO plus ambient NO, defined as NO<sub>c</sub>, was measured by a second 42i TL  
30 chemiluminescent instrument and then NO<sub>2</sub> was calculated based on NO<sub>c</sub>, NO and the efficiency of the  
31 photolytic converter. NO<sub>y</sub> was measured by using an external molybdenum converter heated at 325 °C  
32 and placed as close as possible to the sampling point, followed by a third 42i TL instrument. NO and SO<sub>2</sub>  
33 calibrations were conducted by generating mixing ratios of 0-100 ppbv using NIST certified cylinders  
34 from Scott-Marin (10.3 ppmv accuracy: +/- 2 %), an Environics (Model 6100 Multi-Gas Calibrator), and  
35 a Sabio Zero Generator (Model 1001). The efficiencies of the photolytic and NO<sub>y</sub> converters were  
36 determined using the gas phase titration option of the Environics calibrator. Gas phase elemental Hg  
37 (GEM) was measured with a Tekran 237X instrument (Tekran Instruments Corporation) modified to  
38 allow a reduced sampling time of 2 min (McLagan et al., 2021; Cole et al., 2014).

39 **NH<sub>3</sub>** Ammonia (NH<sub>3</sub>) measurements were conducted using Los Gatos Research's (LGR's) NH<sub>3</sub>/H<sub>2</sub>S  
40 Analyzer (Model 911-0039) sampled through an unfiltered inlet, critical orifice and 4 m of 6.35 mm (¼")  
41 outer diameter Sulfinert-coated tubing heated to 90 °C to minimize NH<sub>3</sub> losses to the tubing walls. The  
42 flow rate was 2.5 LPM, controlled through a critical orifice near the unfiltered inlet with the pressure in  
43 the fluoropel-coated LGR cell being maintained at 100 Torr. For instrument zeros, ambient air was  
44 passed through a Teflon filter coated with citric acid. Calibrations were performed using a certified  
45 ammonia standard (Air Liquide; 10.0 ppm NH<sub>3</sub> in N<sub>2</sub>, accuracy: +/- 5 %), diluted to near-ambient levels.

46 **CO, CO<sub>2</sub>, CH<sub>4</sub>, TC and NMOG<sub>T</sub>** CO, CO<sub>2</sub>, CH<sub>4</sub> were measured with a Cavity Ring Down (CRD)  
47 spectroscopy instrument (Picarro G2401-m). A second Picarro G2401-m instrument was used to measure  
48 total carbon (TC, in units of ppmC) by passing the sample air through a heated (650 °C) platinum catalyst  
49 (Shimadzu), adapted from Stockwell et al. (2018) and Veres et al., (2010). NMOG<sub>T</sub> mixing ratios in units  
50 of ppmC was quantified by subtracting the ambient CH<sub>4</sub>, CO and CO<sub>2</sub> measurements (instrument without  
51 the upstream catalyst) from the TC measurements.

52  
53  
54 Calibrations using two different mixing ratio standards of CO, CO<sub>2</sub> and CH<sub>4</sub> were performed for both  
55 instruments at the beginning and end of each flight to assess instrument drift and sensitivity. NMOG<sub>T</sub>  
56 was averaged to 10 sec (from the 2 sec native time resolution) to increase the signal to noise. Laboratory  
57 experiments indicated that the conversion efficiency of ethane across the catalyst was ~100 %, which is  
58 expected to be the most challenging species to combust aside from methane, which is concurrently  
59 measured. Additional laboratory experiments using a range of hydrocarbons (>C<sub>2</sub>) including aromatics  
60 also exhibited ~100 % conversion efficiency (Li et al., 2021; Li et al., 2019). The catalyst material was  
61 changed after approximately every 5 flights to further ensure minimal changes in efficiency.

62 **CIMS** The CIMS (modified ToFwerk/Aerodyne Api-ToF) instrument sampled from an insulated rear-  
63 facing inlet (PFA, 3/8" OD, 1/4" ID) at 7 LPM (0°C, 1 atm). The instrument was operated using iodide as  
64 a reagent ion. The mass resolution at an internal standard peak (<sup>13</sup>CC<sub>2</sub>H<sub>6</sub>O<sub>2</sub>I-) was ~5400 Th/Th. The  
65 reagent ion was generated by passing 2 sLpm (0°C, 1 atm) of UHP N<sub>2</sub> over a methyl iodide permeation  
66 tube held at 40 °C. This flow was then passed through a Polonium-210 ionizer (NRD P-2031) into the  
67 ion molecule reactor (IMR). A flow of humidified N<sub>2</sub> (20 sccm through a stainless steel bubbler) was  
68 also added to the IMR in order to keep the ratio of I(H<sub>2</sub>O)/I as constant as possible. The IMR and small  
69 segmented quadrupoles (SSQ) were pressure controlled to 70 and 1.5 mBar respectively using Alicat  
70 pressure controllers (PC-EXTSEN). Instrument zeros were performed every 15 min by flooding the inlet  
71 with 10 sLpm (0°C, 1 atm) of air that had been passed through a Pt/Pd catalyst (CD Nova) heated to  
72 350 °C followed by bicarbonate and charcoal scrubbers (United Filtration). A flow (50 sccm) of  
73 isotopically labelled propanoic acid (<sup>13</sup>CC<sub>2</sub>H<sub>6</sub>O<sub>2</sub>) was constantly added to the inlet during the campaign to  
74 track instrument sensitivity. Compounds were identified using known/expected sensitivities and available  
75 calibration standards (Tables S3).

76 **PTRMS** The PTR-ToF-MS (Ionicon Analytik GmbH, Austria) used chemical ionization with H<sub>3</sub>O<sup>+</sup> as  
77 the primary reagent ion in a configuration described previously (Table S1). Gases with a proton affinity

78 greater than that of water were protonated in the drift tube. The pressure and temperature of the drift tube  
79 region were maintained at a constant 2.15 mbar and 60 °C, respectively for an E/N of 141 Td. The unit  
80 contained a catalytic converter heated to 350 °C with a continuous flow of ambient air at a flow rate of  
81 one litre per minute. A permeation tube with 1,2,4-trichlorobenzene was placed at the inlet to improve the  
82 sensitivity of the mass calibration for higher masses. Instrumental backgrounds were performed in flight  
83 using a custom-built zero-air generating unit. The data were processed using Tofware software (Tofwerk  
84 AG). Calibrations were performed on the ground using gas standard mixtures from Ionicon, Apel-Reimer  
85 and Scott-Marrin for 20 compounds (Table S3). For compounds with no available gas standard, a relative  
86 response factor was calculated with reaction rate constants using the method described in Sekimoto et al.  
87 (2017) and guided by the work of Koss et al. (2018) to define an additional 169 ions. Compound  
88 identifications for molecular formulas for the PTRMS and CIMS data were assigned based on a limited  
89 set of possibilities (particularly for the smaller compounds), known or expected compound sensitivities,  
90 and previously published laboratory work by Koss et al. (2018); this is more fully described in the SI  
91 Sect. 2.1.3.

92 **AWAS** The Advanced Whole Air Sampler (AWAS) was used to take 20-30 sec integrated ‘grab’  
93 samples using 1.33-litre electropolished stainless steel canisters in rack-mounted arrays of 12-canister  
94 modules (Lerner et al., 2017, and references therein). A metal bellows compressor (Senior Aerospace  
95 Metal Bellows, MB-158) was used to pressurize canisters to approximately 30 PSI over a period of  
96 approximately 15 sec (30 sec maximum). Sample lines and manifold tubing were continually flushed  
97 with ambient air during the flights. Sampling took place by activating module and pump system valving  
98 with custom Labview-based software operating a data logger interface (Labjack Corp., Model T7). The  
99 samples were analysed and cleaned as soon as possible after the flight with an analytical system installed  
100 at the Fort McMurray International Airport. The on-site analytical system consisted of a custom  
101 fabricated gas chromatograph (GC) system using cryogenic sample pre-concentration, 2-dimensional gas  
102 chromatography, Mass Spectrometric Detection (MS) and Flame Ionization Detection (FID). Sample air  
103 was cryogenically trapped at -185 °C on a glass bead-filled trap, thus condensing/solidifying the

104 hydrocarbons, and subsequently thermally desorbing them at 135 °C into the multi-column, multi-oven  
105 GC/MS/FID instrument. Trapped sample air volumes were calculated by recording pressure differences  
106 in a volume-calibrated downstream vacuum vessel before and after sample trapping. Duplicate analysis  
107 was carried out on one canister in each AWAS module. The analytical separation of approximately 120  
108 chemical species was carried out by use of a pre-column (SPB-1) where the initial separation of  
109 compounds according to boiling point occurred. The low molecular weight compounds (C<sub>2</sub> to C<sub>4</sub>) were  
110 then directed to two RTX-QS columns connected in series and quantified by a FID. The higher molecular  
111 weight compound stream (C<sub>4</sub> to C<sub>10</sub>) was subsequently split and simultaneously analysed by a second FID  
112 connected to an Aluminum Oxide/KCL column (C<sub>4</sub> to C<sub>8</sub>) and by a quadrupole Mass Spectrometer  
113 (Agilent Technologies, 5977B) connected to an HP-1 column by means of a fused silica tubing restrictor  
114 (C<sub>7</sub> to C<sub>10</sub>). The precolumn and RTX-QS columns were mounted in the main oven of the gas  
115 chromatograph (Agilent Technologies 7890B) and thus were subject to one temperature program. The  
116 AlOx/KCL and HP-1 analytical columns were each mounted in a separate temperature-controlled GC  
117 oven module (Agilent Technologies, LTM Series II) and operated with a different temperature program.  
118 Detector peak areas were calibrated with primary gas standard mixtures in the ppbv concentration range  
119 obtained from Apel-Reimer Environmental Inc. (U.S.A.) and the National Physical Laboratory (UK).  
120 Compound retention time drift and potential detector sensitivity changes were monitored and  
121 compensated for by means of daily analysis of a secondary standard gas. The AWAS modules were  
122 cleaned by a custom-fabricated, automated cleaning system similar to that of Lerner et al. (2017).

123 **Cartridges** Integrated gas phase samples were collected using an automated adsorbent tube sampling  
124 assembly (i.e. cartridge) that was mounted in an under-wing pod (see Ditto et al., 2021; SI Sect. 2.1.1).  
125 Samples were collected over the lower set of aircraft transects and higher set of transects, resulting in two  
126 integrated cartridge samples for each screen; only the lower altitude samples are used in the analysis as  
127 the samples for the higher set of transects included a transect that was above the wildfire plume. Samples  
128 were shipped to Yale University where offline analysis was conducted using thermal desorption  
129 (GERSTEL TD 3.5+) followed by gas chromatography (Agilent 7890B), atmospheric pressure chemical

130 ionization, and high-resolution mass spectrometry (Agilent 6550) to speciate gas-phase organic  
131 compounds (Ditto et al., 2021, Sheu et al., 2018, Khare et al., 2019). The samples provided targeted  
132 measurements of gas-phase compounds ranging in volatility from C<sub>10</sub> volatile organic compounds  
133 (VOCs) to C<sub>25</sub> semivolatile organic compounds (SVOCs) including hydrocarbons (CH) as well as  
134 functionalized compounds containing 1 oxygen atom (CHO<sub>1</sub>), and 1 sulfur atom (CHS<sub>1</sub>). Ion abundances  
135 were converted to mass concentrations assuming average response factors that were calculated based on  
136 calibrations using the NIST Reference Gulf of Mexico 2779 Macondo Crude oil reference material  
137 following Khare et al. (2019), which accounts for variations in response and fragmentation between  
138 components of the complex mixture. We acknowledge the limited sample numbers based on flight  
139 design, and that the reported emissions are subject to potential variations in sampling efficiency within the  
140 under-wing sampling pod across C<sub>10</sub>-C<sub>25</sub> and, in the event of losses, would likely be considered lower  
141 limit estimates. CHN<sub>1</sub> was not quantitatively converted to mass due to the lack of available standards.  
142 For CH, CHO<sub>1</sub>, and CHS<sub>1</sub>, each group of isomers at a given carbon number was categorized by molecular  
143 formula, according to their double bond equivalents (DBE) ranging from 0 to 15. Emission ratios (to in-  
144 plume CO) were estimated for CH, CHO<sub>1</sub> and CHS<sub>1</sub> using observed concentrations for the C<sub>10</sub>-C<sub>25</sub> species  
145 summed across DBEs. Further discussion of these methods can be found in Ditto et al. (2021), including  
146 in the SI (i.e., Section S3).

### 147 **2.1.2 Particle measurements**

148         Particles were sampled from a forward-facing isokinetic stainless steel diffuser inlet (Droplet  
149 Measurement Technologies) that was positioned near the top of the fuselage forward of the engine on the  
150 starboard side. Theoretical calculations that take into account the inlet dimensions, volume flow and  
151 velocity indicated a 97 % transmission efficiency for particles < 1 μm through the inlet. Air was pulled  
152 through the inlet into a main 0.5” O.D. stainless steel sampling line maintained at the isokinetic rate of 70  
153 LPM by two venturis mounted on the fuselage in the aft section of the aircraft. The aerosol instruments  
154 subsampled from the main sampling line.

155 **AMS** The high resolution aerosol mass spectrometer (AMS) (Aerodyne) measures submicron particles  
156 that are sampled through a critical orifice and focussed through an aerodynamic lens into a region of low  
157 vacuum. The particles impact a heated surface (600 °C), are vapourized and ionized by 70eV impaction.  
158 Ions are then transferred to a time-of-flight mass spectrometer (Tofwerk) where they are accelerated by  
159 electric fields and separated by their velocities which are dependent on their mass to charge ratios. Ions  
160 are then detected by charged microchannel plates. The AMS was operated only in V mode with 10 sec  
161 time resolution. Several ionization efficiency calibrations performed prior to and during the field  
162 campaign varied by <10 %. To determine the AMS collection efficiency, number concentrations  
163 measured by an Ultra High Sensitivity Aerosol Spectrometer (UHSAS; Droplet Measurement  
164 Technologies Inc.) over a size range of 60 nm to 1 µm were converted to volume concentrations using  
165 mid-point bin diameters and assuming spherical shapes. Volume concentrations were converted to mass  
166 concentrations using densities weighted by the AMS chemical components. A collection efficiency of 0.5  
167 was determined. Detailed investigations and discussions around the collection efficiency of the AMS can  
168 be found in the literature (Middlebrook et al., 2012; Dunlea et al., 2009; Kleinman et al., 2008; Drewnick  
169 et al., 2004; Quinn et al., 2006). PM<sub>1</sub> is the sum of the mass concentrations of AMS components (OA,  
170 NO<sub>3</sub>, SO<sub>4</sub> and NH<sub>4</sub>). For comparisons of PM<sub>1</sub> from this study and PM<sub>2.5</sub> EFs from other studies, the mass  
171 was estimated between 1 and 2.5 µm to assess the extent of which this might be influencing such  
172 comparisons. Using estimated particle mass concentrations from a Fast Cloud Droplet Probe (FCDP) (<  
173 2.5 µm) and those from a UHSAS (<1 µm), there is an estimated 10 % of aerosol mass between 1 and 2.5  
174 µm.

175 **BC** The SP2 (Droplet Measurement Technologies) measures the mass of rBC contained in individual  
176 aerosols through the laser-induced incandescence of heated rBC-containing aerosols (Stephens et al.,  
177 2003; Baumgardner et al., 2004; Schwarz et al., 2006). The SP2 was calibrated using fullerene soot  
178 (Alpha Aesar lot# F12S011) (Moteki and Kondo, 2010; Kondo et al., 2011; Laborde et al., 2012)  
179 nebulized from a water suspension and passed through an aerosol particle mass analyzer (Kanomax  
180 APM3600) to select particles with masses ranging from 0.2 fg/particle to 48 fg/particle. Extremely large

181 particles containing more than 520 fg of rBC were excluded from analysis due to saturation of the  
182 detector (these accounted for only  $2 \times 10^{-3}$  % of the total number of rBC containing particles measured by  
183 the SP2).

184 **UHSAS** Particle size distributions were measured using an Ultra-High Sensitivity Aerosol Spectrometer  
185 (UHSAS; Droplet Measurement Technologies). The UHSAS measures the size of individual aerosols  
186 passing through a laser beam via Mie scattering (Cai et al., 2008; Kupc et al., 2018). These particles are  
187 classified into 99 log-normally spaced bins across the measurement range. Periods where the particle  
188 concentration measured by the UHSAS exceeded 3000 particles  $s^{-1}$  were excluded from this analysis due  
189 to the potential of coincident particles passing through the laser beam. The UHSAS particle sizing was  
190 verified using NIST traceable polystyrene latex (PSL) nanospheres of multiple sizes across the  
191 measurement range. Total particle mass was calculated from the UHSAS measurements assuming a  
192 density of  $1.2 \text{ g cm}^{-3}$ , based on the proportional density determined from the AMS.

### 193 **2.1.3 Identification of organic compounds**

194 Three methods were used to provide detailed measurements of gas-phase organic compounds that  
195 included the PTRMS, CIMS, and canister samples (AWAS). The PTRMS and CIMS are able to resolve  
196 the molecular formula of isobaric species, but cannot distinguish isomers, while the AWAS system can  
197 identify and speciate individual compounds. For the PTRMS measurements, compound molecular  
198 formulae were assigned based on a limited set of possibilities (particularly for the smaller compounds),  
199 known or expected compound sensitivities, and comparing with previously published laboratory work by  
200 Koss et al. (2018) based on typical NMOG structures observed in biomass burning emissions. Koss et al.  
201 (2018) used a combination of gas-chromatography (GC) pre-separation,  $\text{NO}^+$  CIMS and time series  
202 correlations to identify 156 compounds measured in biomass burning laboratory experiments with a  
203 PTRMS. Additional comparisons were made with PTRMS ion masses reported in Permar et al. (2021)  
204 where they used a PTRMS with two GC methods to speciate isomers for some PTRMS ion masses. For  
205 formulas with multiple isomer contributions that were not speciated by the PTRMS, or provided by the



206 AWAS, the fractional contributions in Koss et al. (2018) and Permar et al. (2021) were used to identify  
207 the dominant ion and/or contributing compounds. Although the Koss et al. (2018) work was based on  
208 laboratory measurements, Permar et al. (2021) found that isomer contributions did not vary much between  
209 24 fires types across the WE-CAN airborne field campaign in western US, which were mainly dominated  
210 by fires of pine, fir and spruce trees. For example, in Koss et al. (2018), for the mass spectral ion of  
211  $C_3H_6O$  ( $m/z$  58.08), the contribution from acetone was set at 100 % and propanal 0 %, only slightly  
212 different from the contribution of  $83\pm 6$  % for acetone determined by Permar et al., 2021; thus this  
213 compound was identified as acetone in this work. Another example is  $C_4H_8O$  at  $m/z$  70.091 that has  
214 potential contributions from methyl vinyl ketone (MVK), methacrolein and crotonaldehyde, both Koss et  
215 al. (2018) and Permar et al. (2021) both reported that MVK is the largest contributor at 48 % and  $60\pm 9$  %  
216 respectively; the compound was labelled here as all three. For  $C_8H_{10}$  ( $m/z$  106.168), there are  
217 contributions from ethyl benzene, m- and p-xylenes and o-xylene identified as 10%, 68% and 23%,  
218 respectively (Koss et al., 2018), with slightly different isomer contributions as per Permar et al. (2021).  
219 In this study, as it was not possible to speciate  $C_8H_{10}$  with the AWAS system, it is simply identified as C8  
220 aromatics. Similarly,  $C_{10}H_{16}$ , ( $m/z$  136.238) is identified as total monoterpenes in the present study, with  
221 expected contributions from multiple species including alpha and beta pinene, camphene, myrcene, and  
222 tricyclene (Permar et al., 2021; Hatch et al., 2017).  $C_5H_8$  at  $m/z$  68.119 was identified as isoprene in the  
223 present study, recognizing that there may be a fractional contribution to this mass from methyl-3-buten-2-  
224 ol (MBO), although Permar et al. (2021), suggests that MBO may not be significant, based on their  
225 analysis of western US wildfires.

226 For the CIMS, the iodide reagent ion chemistry is most sensitive to polar compounds, particularly  
227 carboxylic acids and less sensitive to non-polar compounds (Table S1). Compounds were identified using  
228 these known/expected sensitivities and available calibration standards. The AWAS provided speciated  
229 measurements of hydrocarbons (<C9), and no oxygenates.

230

231 **2.1.4 Overlapping compounds** There were a number of compounds (or molecular formulae) that were  
232 measured by both the PTRMS and the AWAS, as well as compounds that overlapped between the  
233 PTRMS and CIMS. Tables S4 and S5 summarize the decisions of overlapping compounds that were  
234 retained for derivation of EFs and NERs, as well as for the carbon/nitrogen budget analyses. For the  
235 PTRMS and AWAS, for some molecular formulae, the AWAS provided measurements of individual  
236 isomers, while the corresponding PTRMS measurement was expected to reflect the sum of those isomers.  
237 In deriving EFs and NERs, both the PTRMS and AWAS measurements were included to retain as much  
238 information as possible. To avoid double-counting compounds in the carbon and nitrogen budget  
239 analyses, only the PTRMS measurement was typically included as it is expected to reflect a sum of all  
240 isomers, thus, accounting for more carbon. For example, at the molecular formulas of C<sub>5</sub>H<sub>10</sub>, the PTRMS  
241 measurements are expected to reflect the sum of all the isomers, whereas 5 compounds were speciated  
242 from the AWAS i.e. c-2-pentene, cyclopentane, 1-pentene, 2-me-1-butene, and 2-me-2-butene. In this  
243 case, EFs and NERs were derived for both the PTRMS and AWAS measurements, but only the PTRMS  
244 measurements were included in the budget analyses.

245 Between the PTRMS and CIMS, there were 18 overlapping molecular formulae of which 4 were  
246 identified as the same compound. The CIMS measurements were retained for 3 of these 4 compounds  
247 (Table S5) because they were directly calibrated (Table S2), whereas the PTRMS compounds were  
248 calculated. For the 4<sup>th</sup> compound (acetic acid), EFs for both instruments were reported, but only the  
249 CIMS data for acetic acid were included in the carbon budget analyses; EFs were very similar (Table A1).  
250 The remaining overlapping formulae between the CIMS and PTRMS were calibrated with different  
251 analytes, and thus assumed to be different species. While there may in fact be some overlap between  
252 isomers contributing to these formulae, their overall contribution to the TC budget is small (<4 %). An  
253 attempt was made to quantify as many other peaks that were present in the CIMS mass spectra as possible  
254 and apply sensitivity factors. However, the available sensitivity factors were based on laboratory  
255 experiments investigating anthropogenic emissions and highly uncertain for biomass burning  
256 measurements. Nevertheless, application of these sensitivity factors resulted in average mass from the

257 CIMS spectra totalling < 1.5 % of the TC, so although uncertain, exclusion of these masses is not  
258 expected to significantly influence the total carbon budget. It is assumed that all the acids measured by  
259 the CIMS are non-aromatic for classifying into chemical structural categories.

260

## 261 **2.2 Flight and fire description**

262 The 18BN-Larry fire (the Lac LaLoche fires) was detected by the Saskatchewan wildfire  
263 management agency on June 23, 2018. Satellite images showed fire hot spots on June 23 and by the  
264 evening of June 23 it grew to 1,250 hectares (ha) and to 2,600 ha on June 24<sup>th</sup>. On the morning of June  
265 25, 2018, there was a very weak nocturnal inversion and moderately strong south to southeast winds at 33  
266 knots above the inversion. The range of fire intensities during the previous night, as well as the observed  
267 high humidity (80-90 %) and light to moderate winds observed at the surface also indicates that the fire  
268 source at the time of aircraft sampling was in a smoldering combustion state. Flight tracks were flown at  
269 Lagrangian distances downwind of the wildfire. Multiple passes (i.e. transects) perpendicular to the  
270 plume direction were made at different altitudes. Two plumes were identified: the SP was clearly due to  
271 the fire hot spots identified by MODIS (green dots encompassed by a polygon), but the source of the NP  
272 is less certain. It is possible that MODIS was unable to detect the fire source because the fire heat  
273 signature was below the threshold for satellite instrument detection. However, surface wind  
274 measurements at Lac LaLoche (SI Table S1 in McLagan et al., 2021) show that the wind direction was  
275 southerly just prior (approx. 30 min) to the start of the aircraft measurements, and then shifted to  
276 southeast (135+/-13°) for the duration of the aircraft flight. Therefore, it is likely that the NP was from  
277 the same fire source as the SP that had been transported in a northerly direction just prior to aircraft  
278 sampling, and subsequently moved to a northwesterly direction with the wind change. The width of the  
279 SP and NP was approximately 14-37 km separated by approximately 8-19 km depending on the sampling  
280 altitude, and with an aircraft speed of ~90 m s<sup>-1</sup>, the plumes were traversed in 3-7 min (Fig. 2).

281

### 282 3 Emission ratios, emission factors and combustion efficiency

#### 283 3.1 Combustion state

284 The combustion efficiency (CE) can be used to characterize and compare the combustion state of  
285 the fire, (i.e. the fraction of fuel carbon converted to atmospheric CO<sub>2</sub>) (Ward and Radke, 1993). The CE  
286 is dependent upon many factors including fire combustion state, fuel chemistry, fuel geometry, growth  
287 stage, moisture content and meteorological conditions such as wind speed and temperature. In a flaming  
288 fire, high temperature reactions tend to go to completion (>90 %) as rapid reaction of O<sub>2</sub> with the fuel C,  
289 H, N and S produces highly oxidized gases including CO<sub>2</sub>, NO<sub>x</sub>, and SO<sub>2</sub> and BC. As a fire progresses,  
290 incomplete combustion characteristics of smoldering fires becomes more dominant resulting in a larger  
291 proportion of the emitted carbon in the form of CO, CH<sub>4</sub>, NMOC, and OA. Airborne measurements tend  
292 to sample a mixture of combustion states; however, there tends to be a dominant phase of combustion at  
293 different fire stages (Andreae and Merlet, 2001). If only accounting for CO<sub>2</sub> and CO, the MCE for the SP  
294 is 0.90±0.01 and NP is 0.88±0.01, higher than the CE by 7.1 % and 6.6 % for the SP and NP,  
295 respectively. These differences are driven mostly by the additional contribution from NMOGs indicating  
296 the importance of their inclusion in assessing fire combustion state.

297 Since the flaming phase was likely more than 14 hrs prior to aircraft sampling, it is possible that  
298 the emissions from this fire may also reflect a residual smoldering combustion (RSC) component. RSC  
299 produces emissions from combustion of forest floor and woody debris that are not associated with  
300 flaming, can be sustained for long periods of time after the passage of a flame front, and are not strongly  
301 lofted through fire-induced convection (Bertschi et al., 2003). It is noted though that observations of  
302 increased levels of flaming compounds in the plumes including CO<sub>2</sub> and BC (Fig. S2) suggest that to  
303 some extent, flaming processes also contributed to the release of these compounds. It is likely that  
304 different parts of the fire had varying mixtures of smoldering, flaming and residual combustion processes,  
305 but the evidence strongly suggests that the Lac LaLoche fire was predominantly in a smoldering  
306 combustion state during the aircraft measurement time period. Smoldering fires can create persistent and  
307 poorly ventilated smoke that can be a significant driver in remote community evacuations (McGee, 2020).

308 In addition, boreal fires in this region tend to exhibit a large component of smoldering combustion which  
309 can consume large amounts of above and below ground biomass (Akagi et al., 2011).  
310

311 Table S1. Measurements with associated instrument, principle of operation, sampling time resolution and  
 312 applicable method references.

| Measurement                                          | Instrument                    | Principle of measurement                                                                   | Time Resolution (s)              | Uncertainty                                                    | Reference                                                    |
|------------------------------------------------------|-------------------------------|--------------------------------------------------------------------------------------------|----------------------------------|----------------------------------------------------------------|--------------------------------------------------------------|
| NO                                                   | Thermo 42i                    | Chemiluminescence with O <sub>3</sub>                                                      | 1                                | ±5 %                                                           | Clyne et al., 1964<br>Ridley et al., 1990                    |
| NO <sub>2</sub>                                      | Thermo 42i                    | Photolysis + chemiluminescence with O <sub>3</sub>                                         | 1                                | ±7 %                                                           | Penkett et al., 2011                                         |
| NO <sub>y</sub>                                      | Thermo 42i                    | Heated (350°C) and molybdenum catalyzed conversion + chemiluminescence with O <sub>3</sub> | 1                                | ±5 %                                                           | Fehsenfeld et al., 1987;<br>Williams et al., 1998            |
| SO <sub>2</sub>                                      | Thermo 43i                    | UV pulsed fluorescence                                                                     | 1                                | ±5 %                                                           | Stecher et al., 1997                                         |
| O <sub>3</sub>                                       | Thermo 42i                    | Chemiluminescence                                                                          | 1                                | ±5 %                                                           | N/A                                                          |
| NH <sub>3</sub>                                      | LGR model 911-0039            | Absorption                                                                                 | 1                                | ±5 %                                                           | Leifer et al., 2017                                          |
| Hg                                                   | Tekran 237X                   | Fluorescence                                                                               | 120                              |                                                                | Cole et al., 2014;<br>McLagan et al., 2021                   |
| CO, CO <sub>2</sub> , CH <sub>4</sub>                | Picarro G-2401-m              | Cavity ring down spectrometry                                                              | 2                                | CH <sub>4</sub> ~3 ppb at background                           | Baray et al., 2018                                           |
| Total Carbon (TC)                                    | Picarro G-2401-m              | Heated (650°C) platinum catalyzed conversion to CO <sub>2</sub>                            | 2                                |                                                                | Stockwell et al., 2018; Veres et al., 2010.                  |
| Total non-methane organic gases (NMOG <sub>T</sub> ) | Picarro G-2401-m x 2          | Difference method, heated (650°C) platinum catalyzed conversion to CO <sub>2</sub>         | 10                               |                                                                | Stockwell et al., 2018; Veres et al., 2010                   |
| VOCs                                                 | CIMS                          | Chemical ionization/mass spectrometry                                                      | 1                                | 10-50% compound dependent                                      | Liggio et al., 2017; Lee et al., 2014                        |
| VOCs                                                 | Canister grab samples         | Grab samples/GC with MS and FID analysis                                                   | Grab                             | 40 %                                                           |                                                              |
| VOCs                                                 | PTRMS                         | Proton transfer/ionization/mass spectrometry                                               | 1                                | VOCs with available standards: 15-20%;<br>Calculated VOCs: 50% | Li et al., 2017;<br>Sekimoto et al., 2017                    |
| VOCs-SVOCs (C10-C25)                                 | Custom packed adsorbent tubes | Offline analysis with TD-GC-APCI-Q-ToF                                                     | Variable (245-3140 sec per tube) |                                                                | Sheu et al., 2018;<br>Khare et al., 2019; Ditto et al., 2021 |

|                                           |                                                     |                                                  |    |                                                                                 |                                                                       |
|-------------------------------------------|-----------------------------------------------------|--------------------------------------------------|----|---------------------------------------------------------------------------------|-----------------------------------------------------------------------|
| Particle chemical composition             | Aerosol mass spectrometer                           | Volatilization, ionization and mass spectrometry | 10 | OA: 35%<br>SO <sub>4</sub> :25%<br>NO <sub>3</sub> :20%<br>NH <sub>4</sub> :25% | DeCarlo et al., 2008; Jimenez et al., 2003; Allan et al., 2003        |
| Black carbon                              | SP2                                                 | Incandescence                                    | 1  |                                                                                 | Stephens et al., 2003; Baumgardner et al., 2004; Schwarz et al., 2006 |
| Particle size distributions (60 -1000 nm) | Ultra-High Sensitivity Aerosol Spectrometer (UHSAS) | Particle light scattering                        | 1  |                                                                                 | Cai et al., 2008; Kupc et al., 2018                                   |

313

314

315

316

317

318

319

320

321

322

323

324

325

326

327

328

329

330

331

332

333

334 Table S2. Standards used to calibrate the CIMS. The iodide chemistry is most sensitive to polar  
 335 compounds and less sensitive to non-polar compounds. The sensitivity tends to increase for keto-,  
 336 hydroxy- and acid groups, in order. Most of the keto- groups are attached to a carboxylic acid. For the  
 337 larger acids (>C4) where there can be several isomers, they are generally identified as saturated C4  
 338 carboxylic acids and unsaturated C5 acids.

| <b>Molecular weight</b> | <b>Molecular formula</b>                      | <b>Compound Name</b> | <b>Calibration standard</b> | <b>Calibration Source</b>                                                                                                               | <b>Reference</b>     |
|-------------------------|-----------------------------------------------|----------------------|-----------------------------|-----------------------------------------------------------------------------------------------------------------------------------------|----------------------|
| 27.026                  | HCN                                           | hydrogen cyanide     | Hydrogen Cyanide            | High Pressure Cylinder (Air Liquide)                                                                                                    | Stockwell et al 2018 |
| 32.06                   | SO <sub>2</sub>                               | sulphur dioxide      | Sulfur Dioxide              | High Pressure Cylinder (Air Liquide)                                                                                                    | Lee et al 2018       |
| 43.025                  | HNCO                                          | isocyanic acid       | Isocyanic Acid              | Thermal Decomposition/Diffusion                                                                                                         | Roberts et al 2010   |
| 46.025                  | CH <sub>2</sub> O <sub>2</sub>                | formic acid          | Formic Acid                 | Liquid Standard supplied by Liquid Calibration Unit (LCU)                                                                               | Mungall et al 2017   |
| 47.013                  | HNO <sub>2</sub>                              | nitrous acid         | Nitrous Acid                | Acid Displacement (output quantified by ion chromatography)                                                                             | Roberts et al 2010   |
| 57.052                  | C <sub>2</sub> H <sub>3</sub> NO              | hydroxy acetonitrile | Glycolic Acid Nitrile       | Liquid Standard supplied by Liquid Calibration Unit (LCU)                                                                               | Mungall et al 2017   |
| 60.052                  | C <sub>2</sub> H <sub>4</sub> O <sub>2</sub>  | acetic acid          | Acetic Acid                 | Liquid Standard supplied by Liquid Calibration Unit (LCU)                                                                               | Mungall et al 2017   |
| 63.012                  | HNO <sub>3</sub>                              | nitric acid          | Nitric Acid                 | Permeation Tube (output quantified by ion chromatography)                                                                               | Neuman et al 1999    |
| 72.063                  | C <sub>3</sub> H <sub>4</sub> O <sub>2</sub>  | acrylic acid         | Acrylic Acid                | Liquid Standard supplied by Liquid Calibration Unit (LCU)                                                                               | Mungall et al 2017   |
| 74.079                  | C <sub>3</sub> H <sub>6</sub> O <sub>2</sub>  | propionic acid       | Propionic Acid              | Liquid Standard supplied by Liquid Calibration Unit (LCU)                                                                               | Mungall et al 2017   |
| 79.011                  | HNO <sub>4</sub>                              | pernitric acid       | Pernitric Acid              | Reaction of HO <sub>2</sub> with NO <sub>2</sub> (quantified by thermal decomposition Cavity Ringdown Spectroscopy of NO <sub>2</sub> ) | Veres et al 2015     |
| 84.074                  | C <sub>4</sub> H <sub>4</sub> O <sub>2</sub>  | c4h4o2               | 2(5H)-Furanone              | Liquid Standard supplied by Liquid Calibration Unit (LCU)                                                                               | Mungall et al 2017   |
| 85.062                  | C <sub>3</sub> H <sub>3</sub> NO <sub>2</sub> | cyanoacetic acid     | Cyanoacetic Acid            | Liquid Standard supplied by Liquid Calibration Unit (LCU)                                                                               | Mungall et al 2017   |
| 86.09                   | C <sub>4</sub> H <sub>6</sub> O <sub>2</sub>  | methacrylic acid     | Methacrylic Acid            | Liquid Standard supplied by Liquid Calibration Unit (LCU)                                                                               | Mungall et al 2017   |



|         |                                               |                                                               |                                                     |                                                                                                                                         |                    |
|---------|-----------------------------------------------|---------------------------------------------------------------|-----------------------------------------------------|-----------------------------------------------------------------------------------------------------------------------------------------|--------------------|
| 88.062  | C <sub>3</sub> H <sub>4</sub> O <sub>3</sub>  | pyruvic acid                                                  | Pyruvic Acid                                        | Liquid Standard supplied by Liquid Calibration Unit (LCU)                                                                               | Mungall et al 2017 |
| 88.106  | C <sub>4</sub> H <sub>8</sub> O <sub>2</sub>  | C4 saturated carboxylic acids                                 | Butyric Acid                                        | Liquid Standard supplied by Liquid Calibration Unit (LCU)                                                                               | Mungall et al 2017 |
| 91.066  | C <sub>2</sub> H <sub>5</sub> NO <sub>3</sub> | C2 Nitro alcohol                                              | 2-Nitroethanol                                      | Liquid Standard supplied by Liquid Calibration Unit (LCU)                                                                               | Mungall et al 2017 |
| 100.117 | C <sub>5</sub> H <sub>8</sub> O <sub>2</sub>  | unsaturated C5 carboxylic acids                               | 4-Pentenoic Acid                                    | Liquid Standard supplied by Liquid Calibration Unit (LCU)                                                                               | Mungall et al 2017 |
| 102.089 | C <sub>4</sub> H <sub>6</sub> O <sub>3</sub>  | C4 oxo-carboxylic acids                                       | 2-Ketobutyric Acid                                  | Liquid Standard supplied by Liquid Calibration Unit (LCU)                                                                               | Mungall et al 2017 |
| 102.133 | C <sub>5</sub> H <sub>10</sub> O <sub>2</sub> | C5 saturated carboxylic acids                                 | Valeric Acid + Isovaleric Acid (equal parts)        | Liquid Standard supplied by Liquid Calibration Unit (LCU)                                                                               | Mungall et al 2017 |
| 104.105 | C <sub>4</sub> H <sub>8</sub> O <sub>3</sub>  | C4 hydroxy-carboxylic acids                                   | 3-Hydroxybutyric Acid                               | Liquid Standard supplied by Liquid Calibration Unit (LCU)                                                                               | Mungall et al 2017 |
| 108.009 | N <sub>2</sub> O <sub>5</sub>                 | dinitrogen pentoxide                                          | Dinitrogen Pentaoxide                               | Titration of NO <sub>2</sub> with O <sub>3</sub> (quantified by thermal decomposition Cavity Ringdown Spectroscopy of NO <sub>2</sub> ) | Lee et al 2018     |
| 114.144 | C <sub>6</sub> H <sub>10</sub> O <sub>2</sub> | sum of cyclic saturated and n-unsaturated C5 carboxylic acids | Cyclopentanecarboxylic Acid                         | Liquid Standard supplied by Liquid Calibration Unit (LCU)                                                                               | Mungall et al 2017 |
| 116.116 | C <sub>5</sub> H <sub>8</sub> O <sub>3</sub>  | C5 oxo-carboxylic acids                                       | Levulinic Acid                                      | Liquid Standard supplied by Liquid Calibration Unit (LCU)                                                                               | Mungall et al 2017 |
| 116.16  | C <sub>6</sub> H <sub>12</sub> O <sub>2</sub> | C6 saturated carboxylic acids                                 | Hexanoic Acid + 4-Methyl-Valeric Acid (equal parts) | Liquid Standard supplied by Liquid Calibration Unit (LCU)                                                                               | Mungall et al 2017 |
| 118.132 | C <sub>5</sub> H <sub>10</sub> O <sub>3</sub> | C5 hydroxy-carboxylic acids                                   | 2-Hydroxy-2-methylbutyric Acid                      | Liquid Standard supplied by Liquid Calibration Unit (LCU)                                                                               |                    |

|         |                                               |                                                |                                     |                                                                 |  |
|---------|-----------------------------------------------|------------------------------------------------|-------------------------------------|-----------------------------------------------------------------|--|
| 126.155 | C <sub>7</sub> H <sub>10</sub> O <sub>2</sub> | unsaturated<br>C6 cyclic<br>carboxylic<br>acid | 3-Cyclohexene-1-<br>carboxylic Acid | Liquid Standard supplied<br>by Liquid Calibration<br>Unit (LCU) |  |
| 128.171 | C <sub>7</sub> H <sub>12</sub> O <sub>2</sub> | C6<br>unsaturated<br>carboxylic<br>acids       | 6-Heptenoic Acid                    | Liquid Standard supplied<br>by Liquid Calibration<br>Unit (LCU) |  |
| 130.187 | C <sub>7</sub> H <sub>14</sub> O <sub>2</sub> | C7<br>saturated<br>carboxylic<br>acids         | Heptanoic Acid                      | Liquid Standard supplied<br>by Liquid Calibration<br>Unit (LCU) |  |
| 132.159 | C <sub>6</sub> H <sub>12</sub> O <sub>3</sub> | C6<br>hydroxy-<br>carboxylic<br>acids          | 2-Hydroxyisocaproic<br>Acid         | Liquid Standard supplied<br>by Liquid Calibration<br>Unit (LCU) |  |

339

340

341 Table S3. Standards used to calibrate the PTRMS. <sup>a</sup>C8 aromatics - expected contributions from ethyl  
 342 benzene, m- and p-xylenes and o-xylene. <sup>b</sup>Monoterpenes - expected contributions from camphene,  $\alpha$ -  
 343 pinene,  $\beta$ -pinene, myrcene, and tricyclene.  
 344

| <b>Molecular weight</b> | <b>Molecular formula</b>         | <b>Compound Name</b>                 | <b>Calibration standard</b> |
|-------------------------|----------------------------------|--------------------------------------|-----------------------------|
| 30.026                  | CH <sub>2</sub> O                | formaldehyde                         | formaldehyde                |
| 32.042                  | CH <sub>4</sub> O                | methanol                             | methanol                    |
| 34.076                  | H <sub>2</sub> S                 | hydrogen sulfide                     | hydrogen sulfide            |
| 41.053                  | C <sub>2</sub> H <sub>3</sub> N  | acetonitrile                         | acetonitrile                |
| 44.053                  | C <sub>2</sub> H <sub>4</sub> O  | acetaldehyde                         | acetaldehyde                |
| 56.064                  | C <sub>3</sub> H <sub>4</sub> O  | acrolein                             | acrolein                    |
| 58.08                   | C <sub>3</sub> H <sub>6</sub> O  | acetone                              | acetone                     |
| 62.13                   | C <sub>2</sub> H <sub>6</sub> S  | dimethyl sulfide                     | dimethyl sulfide            |
| 68.119                  | C <sub>5</sub> H <sub>8</sub>    | isoprene                             | isoprene                    |
| 70.091                  | C <sub>4</sub> H <sub>6</sub> O  | MVK, methacrolein, crotonaldehyde    | crotonaldehyde              |
| 72.107                  | C <sub>4</sub> H <sub>8</sub> O  | MEK, 2-methyl acetate, ethyl formate | methylethyl ketone          |
| 76.157                  | C <sub>3</sub> H <sub>8</sub> S  | 2-propanethiol, ethyl methyl sulfide | ethylmethyl sulfide         |
| 78.114                  | C <sub>6</sub> H <sub>6</sub>    | benzene                              | benzene                     |
| 84.136                  | C <sub>4</sub> H <sub>4</sub> S  | thiophene                            | thiophene                   |
| 90.184                  | C <sub>4</sub> H <sub>10</sub> S | diethyl sulfide, butanethiol         | diethyl sulfide             |
| 92.141                  | C <sub>7</sub> H <sub>8</sub>    | toluene                              | toluene                     |
| 98.163                  | C <sub>5</sub> H <sub>6</sub> S  | methyl thiophene                     | 2-methylthiophene           |
| 106.168                 | C <sub>8</sub> H <sub>10</sub>   | C8 aromatics <sup>a</sup>            | o-xylene                    |
| 112.19                  | C <sub>6</sub> H <sub>8</sub> S  | dimethylthiophene                    | 2,3-dimethylthiophene       |
| 136.238                 | C <sub>10</sub> H <sub>16</sub>  | monoterpenes <sup>b</sup>            | camphene                    |

345

346 Table S4. Overlapping compounds measured between the PTRMS and AWAS.

| Molecular Weight | Formula                        | Compound Name       | Instrument     | Decision for budget                  | Decision for EFs                     |
|------------------|--------------------------------|---------------------|----------------|--------------------------------------|--------------------------------------|
| 42.081           | C <sub>3</sub> H <sub>6</sub>  | propene             | AWAS and PTRMS | AWAS                                 | AWAS                                 |
| 54.092           | C <sub>4</sub> H <sub>6</sub>  | butadiene/fragments | PTRMS          | PTRMS                                | PTRMS and AWAS                       |
|                  |                                | 1,3-butadiene       | AWAS           |                                      |                                      |
| 56.108           | C <sub>4</sub> H <sub>8</sub>  | butenes             | PTRMS          | AWAS                                 | AWAS                                 |
|                  |                                | cis-2-butene        | AWAS           |                                      |                                      |
|                  |                                | isobutene           | AWAS           |                                      |                                      |
|                  |                                | trans-2-butene      | AWAS           |                                      |                                      |
|                  |                                | 1-butene            | AWAS           |                                      |                                      |
| 58.124           | C <sub>4</sub> H <sub>10</sub> | butanes             | PTRMS          | AWAS                                 | AWAS                                 |
|                  |                                | isobutane           | AWAS           |                                      |                                      |
|                  |                                | n-butane            | AWAS           |                                      |                                      |
| 70.135           | C <sub>5</sub> H <sub>10</sub> | pentene/fragments   | PTRMS          | PTR                                  | PTRMS and AWAS                       |
|                  |                                | cis-2-pentene       | AWAS           |                                      |                                      |
|                  |                                | cyclopentane        | AWAS           |                                      |                                      |
|                  |                                | 1-pentene           | AWAS           |                                      |                                      |
|                  |                                | 2-methyl-1-butene   | AWAS           |                                      |                                      |
|                  |                                | 2-methyl-2-butene   | AWAS           |                                      |                                      |
| 78.114           | C <sub>6</sub> H <sub>6</sub>  | benzene             | PTRMS and AWAS | PTRMS                                | PTRMS                                |
| 82.146           | C <sub>6</sub> H <sub>10</sub> | cyclohexene         | PTRMS and AWAS | PTRMS                                | PTRMS                                |
| 84.162           | C <sub>6</sub> H <sub>12</sub> | hexene              | PTRMS and AWAS | PTRMS (hexane)<br>AWAS (cyclohexane) | PTRMS (hexane)<br>AWAS (cyclohexane) |
|                  |                                | cyclohexane         | AWAS           |                                      |                                      |
| 86.178           | C <sub>6</sub> H <sub>14</sub> | hexanes             | PTRMS and AWAS | AWAS                                 | AWAS                                 |
|                  |                                | n-hexane            | AWAS           |                                      |                                      |
|                  |                                | 2,3-dimethyl butane | AWAS           |                                      |                                      |
|                  |                                | 2,3-dimethylpentane | AWAS           |                                      |                                      |

347

348

349

350

351

352 Table S5. Overlapping compounds measured between the PTRMS and CIMS. <sup>a</sup>The PTRMS signal at  
 353 molecular weight 60.052 is reported as acetic acid fragment; the signal can also be due to glycoaldehyde  
 354 (Koss et al., 2018), but the PTRMS and CIMS acetic acid mixing ratios and EFs match each other closely  
 355 suggesting that the PTRMS fragment is mostly due to acetic acid.

| Molecular weight | Formula                                       | CIMS compound name                                          | PTRMS compound name                       | Decision                                                       |
|------------------|-----------------------------------------------|-------------------------------------------------------------|-------------------------------------------|----------------------------------------------------------------|
| 43.025           | HNCO                                          | Isocyanic acid                                              | Isocyanic acid                            | CIMS and PTRMS for reporting EF and ER; CIMS for carbon budget |
| 46.025           | CH <sub>2</sub> O <sub>2</sub>                | Formic acid                                                 | Formic acid                               | CIMS                                                           |
| 57.052           | C <sub>2</sub> H <sub>3</sub> NO              | Hydroxy acetonitrile                                        | Methyl isocyanate                         | CIMS and PTRMS                                                 |
| 60.052           | C <sub>2</sub> H <sub>4</sub> O <sub>2</sub>  | Acetic acid                                                 | Acetic acid fragment <sup>a</sup>         | CIMS and PTRMS for reporting EF and ER; CIMS for carbon budget |
| 72.063           | C <sub>3</sub> H <sub>4</sub> O <sub>2</sub>  | Acrylic acid                                                | Methyl glyoxal/acrylic acid               | CIMS                                                           |
| 74.079           | C <sub>3</sub> H <sub>6</sub> O <sub>2</sub>  | Propionic acid                                              | Hydroxy acetone/ethyl formate             | CIMS and PTRMS                                                 |
| 84.074           | C <sub>4</sub> H <sub>4</sub> O <sub>2</sub>  | Unidentified                                                | Furanone                                  | CIMS and PTRMS                                                 |
| 85.062           | C <sub>3</sub> H <sub>3</sub> NO <sub>2</sub> | Cyanoacetic acid                                            | Methyl cyanofomate                        | CIMS and PTRMS                                                 |
| 86.09            | C <sub>4</sub> H <sub>6</sub> O <sub>2</sub>  | Methacrylic acid                                            | Butanedione/isomers                       | CIMS and PTRMS                                                 |
| 88.062           | C <sub>3</sub> H <sub>4</sub> O <sub>3</sub>  | Pyruvic acid                                                | Pyruvic acid                              | CIMS                                                           |
| 88.106           | C <sub>4</sub> H <sub>8</sub> O <sub>2</sub>  | C4 saturated carboxylic acids                               | Methyl propanoate                         | CIMS and PTRMS                                                 |
| 100.117          | C <sub>5</sub> H <sub>8</sub> O <sub>2</sub>  | Unsaturated C5 carboxylic acids                             | Methyl methacrylate/isomers               | CIMS and PTRMS                                                 |
| 102.089          | C <sub>4</sub> H <sub>6</sub> O <sub>3</sub>  | C4 oxo-carboxylic acids                                     | Acetic anhydride                          | CIMS and PTRMS                                                 |
| 102.133          | C <sub>5</sub> H <sub>10</sub> O <sub>2</sub> | C5 saturated carboxylic acids                               | Valeric acid                              | CIMS and PTRMS                                                 |
| 114.144          | C <sub>6</sub> H <sub>10</sub> O <sub>2</sub> | Sum of cyclic saturated and n-saturated C5 carboxylic acids | Caprolactone/c6 esters/c6diketone isomers | CIMS and PTRMS                                                 |
| 116.16           | C <sub>6</sub> H <sub>12</sub> O <sub>2</sub> | C6 carboxylic acids                                         | Butyl acetate/c6 esters                   | CIMS and PTRMS                                                 |
| 118.132          | C <sub>7</sub> H <sub>10</sub> O <sub>2</sub> | Unsaturated C6 cyclic carboxylic acids                      | Cyclohexene carboxylic acid               | CIMS and PTRMS                                                 |
| 128.171          | C <sub>7</sub> H <sub>12</sub> O <sub>2</sub> | C6 unsaturated carboxylic acids                             | Cyclohexanoic acid                        | CIMS and PTRMS                                                 |
| 130.187          | C <sub>7</sub> H <sub>14</sub> O <sub>2</sub> | C7 saturated carboxylic acids                               | Amyl acetate                              | CIMS and PTRMS                                                 |

356

357

358 Table S6. Compounds with no significant observed emissions

| <b>Molecular Weight</b> | <b>Formula</b>                                | <b>Compound Name</b>        | <b>Instrument</b> |
|-------------------------|-----------------------------------------------|-----------------------------|-------------------|
| 34.08                   | H <sub>2</sub> S                              | hydrogen sulfide            | PTRMS             |
| 70.05                   | C <sub>2</sub> H <sub>3</sub> O <sub>2</sub>  | Propiolic acid              | PTRMS             |
| 72.17                   | C <sub>5</sub> H <sub>12</sub>                | 2,2-dimethylpropane         | AWAS              |
| 82.06                   | C <sub>4</sub> H <sub>2</sub> O <sub>2</sub>  | cyclobutenedione            | PTRMS             |
| 85.06                   | C <sub>3</sub> H <sub>3</sub> NO <sub>2</sub> | cyanoacetic acid            | CIMS              |
| 86.2                    | C <sub>6</sub> H <sub>14</sub>                | 2,2-dimethylbutane          | AWAS              |
| 91.07                   | C <sub>2</sub> H <sub>5</sub> NO <sub>3</sub> | C2 nitro alcohol            | CIMS              |
| 100.07                  | C <sub>4</sub> H <sub>4</sub> O <sub>3</sub>  | dihydro furandione          | PTRMS             |
| 102.195                 | C <sub>5</sub> H <sub>10</sub> S              | cyclopentanethiol           | PTRMS             |
| 104.105                 | C <sub>4</sub> H <sub>8</sub> O <sub>3</sub>  | C4 hydroxy-carboxylic acids | CIMS              |
| 112.24                  | C <sub>8</sub> H <sub>16</sub>                | cis-1,2-dimethylcyclohexane | AWAS              |
| 112.56                  | C <sub>6</sub> H <sub>5</sub> Cl              | chlorobenzene               | PTRMS             |
| 118.13                  | C <sub>5</sub> H <sub>10</sub> O <sub>3</sub> | C5 hydroxy-carboxylic acids | CIMS              |
| 128.29                  | C <sub>9</sub> H <sub>20</sub>                | 2,5-dimethylheptane         | AWAS              |
| 134.24                  | C <sub>10</sub> H <sub>14</sub>               | 1-methyl-2-n-propylbenzene  | AWAS              |
| 140.25                  | C <sub>8</sub> H <sub>12</sub> S              | butylthiophene              | PTRMS             |
| 142.32                  | C <sub>10</sub> H <sub>22</sub>               | 2,2-dimethyloctane          | AWAS              |
| 147.00                  | C <sub>6</sub> H <sub>4</sub> Cl <sub>2</sub> | dichlorobenzene             | PTRMS             |
| 154.12                  | C <sub>7</sub> H <sub>6</sub> O <sub>4</sub>  | dihydroxybenzoic acid       | PTRMS             |
| n/a                     | Cl <sup>-</sup>                               | p-chloride                  | AMS               |

359

360

361

362

363

364

365

366

367

368

369

370

371

372 Table S7. Emission ratios (relative to CO, as  $\mu\text{g m}^{-3}$  per  $\mu\text{g m}^{-3}$  CO) for complex mixtures of gas-phase  
 373 CH, CHO<sub>1</sub>, and CHS<sub>1</sub> compounds grouped by carbon number for all targeted molecular formulas, derived  
 374 from the integrated cartridge samples, using the sample taken across the lowest transects of Screen 1.  
 375 Note: based on flight design, it was not possible to directly derive emission factors due to the lack of  
 376 background cartridge samples in the upwind region of the fire so ratios to CO in the concentrated lower  
 377 (Screen 1) transects are used in the analysis to approximate emission factors from the wildfire.

| <b>Carbon Number</b> | <b>CH in-plume ratio to CO</b> | <b>CHO<sub>1</sub> in-plume ratio to CO</b> | <b>CHS<sub>1</sub> in-plume ratio to CO</b> |
|----------------------|--------------------------------|---------------------------------------------|---------------------------------------------|
| <b>10</b>            | 7.65E-03                       | 2.28E-03                                    | 5.59E-06                                    |
| <b>11</b>            | 0.00E+00                       | 4.71E-04                                    | 1.15E-05                                    |
| <b>12</b>            | 3.86E-05                       | 5.23E-04                                    | 1.73E-06                                    |
| <b>13</b>            | 1.71E-04                       | 3.84E-04                                    | 9.74E-06                                    |
| <b>14</b>            | 1.11E-04                       | 7.65E-04                                    | 4.15E-06                                    |
| <b>15</b>            | 2.62E-04                       | 7.12E-04                                    | 1.67E-05                                    |
| <b>16</b>            | 8.05E-04                       | 4.96E-04                                    | 4.85E-05                                    |
| <b>17</b>            | 8.70E-04                       | 1.33E-03                                    | 2.42E-04                                    |
| <b>18</b>            | 1.20E-03                       | 9.05E-04                                    | 8.43E-05                                    |
| <b>19</b>            | 1.37E-03                       | 8.46E-04                                    | 3.04E-04                                    |
| <b>20</b>            | 2.01E-03                       | 6.48E-04                                    | 1.01E-04                                    |
| <b>21</b>            | 1.77E-03                       | 3.66E-04                                    | 2.05E-04                                    |
| <b>22</b>            | 2.85E-03                       | 2.31E-04                                    | 6.34E-05                                    |
| <b>23</b>            | 1.58E-03                       | 1.06E-04                                    | 2.08E-05                                    |
| <b>24</b>            | 7.24E-04                       | 8.68E-05                                    | 4.28E-05                                    |
| <b>25</b>            | 3.03E-04                       | 3.92E-05                                    | 4.36E-05                                    |

378  
 379  
 380  
 381  
 382  
 383  
 384  
 385  
 386  
 387  
 388  
 389  
 390

391 Table S8. Compounds shown in Figure 7 where the identifications/naming are not exact matches with the  
 392 current study. 1 Individually identified compounds were summed for comparison to the present study; 2  
 393 Each compound was compared with the value from the present study.

| Molecular Weight | Compound                                     | Instrument | Compound Name                                                  | Andreae Names                             | Koss Names                                                     | Permar Names                                                                | Urbanski Names                                                                       |
|------------------|----------------------------------------------|------------|----------------------------------------------------------------|-------------------------------------------|----------------------------------------------------------------|-----------------------------------------------------------------------------|--------------------------------------------------------------------------------------|
| 54.092           | C <sub>4</sub> H <sub>6</sub>                | PTRMS      | butadiene/fr<br>agments                                        | butadiene                                 | 1,3-butadiene<br>+ 1,2-<br>butadiene                           | 1,3-butadiene,<br>1,2-butadiene                                             | n/a                                                                                  |
| 54.092           | C <sub>4</sub> H <sub>6</sub>                | AWAS       | 1,3-<br>butadiene                                              | butadiene                                 | 1,3-butadiene<br>+ 1,2-<br>butadiene                           | 1,3-butadiene,<br>1,2-butadiene                                             | n/a                                                                                  |
| 57.052           | C <sub>2</sub> H <sub>3</sub> NO             | CIMS       | hydroxy<br>acetonitrile                                        | n/a                                       | methyl<br>isocyanate +<br>hydroxyaceto<br>nitrile              | methyl<br>isocyanate,<br>hydroxyacetonitril<br>e                            | n/a                                                                                  |
| 58.124           | C <sub>4</sub> H <sub>10</sub>               | AWAS       | isobutane                                                      | n/a                                       | n/a                                                            | n-Butane                                                                    | n/a                                                                                  |
| 60.052           | C <sub>2</sub> H <sub>4</sub> O <sub>2</sub> | CIMS       | acetic acid                                                    | Acetic acid                               | acetic acid +<br>glycolaldehyd<br>e                            | acetic acid,<br>glycolaldehyde<br>(=hydroxyacetalde<br>hyde)                | n/a                                                                                  |
| 60.096           | C <sub>3</sub> H <sub>8</sub> O              | PTRMS      | propanol                                                       | n/a                                       | n/a                                                            | Isopropanol                                                                 | n/a                                                                                  |
| 66.103           | C <sub>5</sub> H <sub>6</sub>                | PTRMS      | cyclopentan<br>diene                                           | n/a                                       | n/a                                                            | 1,3-<br>cyclopentadiene                                                     | 1,3-<br>Cyclopentadie<br>nePIT                                                       |
| 70.091           | C <sub>4</sub> H <sub>6</sub> O              | PTRMS      | MVK,<br>methacrolein<br>,<br>crotonaldehyd<br>e                | Methacrolei<br>n                          | MVK +<br>methacrolein<br>+<br>crotonaldehyd<br>e               | Methyl vinyl<br>ketone,<br>Methacrolein, 2-<br>Butenal<br>(=crotonaldehyde) | <sup>1</sup> Crotonaldehyd<br>e +<br>Methacrolein<br>+ Methyl<br>Vinyl Ketone<br>MVK |
| 70.135           | C <sub>5</sub> H <sub>10</sub>               | PTRMS      | pentene/met<br>hyl<br>butene/frag<br>ments                     | 1-Pentene +<br>2-pentene                  | pentene+met<br>hyl butene                                      | pentenes,<br>methylbutenes                                                  | n/a                                                                                  |
| 70.135           | C <sub>5</sub> H <sub>10</sub>               | AWAS       | c-2-pentene                                                    | 2 pentene<br>cis&tran                     | pentene+met<br>hyl butene                                      | pentenes,<br>methylbutenes                                                  | n/a                                                                                  |
| 70.135           | C <sub>5</sub> H <sub>10</sub>               | AWAS       | cyclopentan<br>e                                               |                                           |                                                                | cyclopentane                                                                | n/a                                                                                  |
| 70.135           | C <sub>5</sub> H <sub>10</sub>               | AWAS       | pentene                                                        | 1-Pentene                                 | pentene+met<br>hyl butene                                      | pentenes,<br>methylbutenes                                                  | n/a                                                                                  |
| 70.135           | C <sub>5</sub> H <sub>10</sub>               | AWAS       | methyl-1-<br>butene                                            | 1-Pentene                                 | pentene+met<br>hyl butene                                      | pentenes,<br>methylbutenes                                                  | n/a                                                                                  |
| 70.135           | C <sub>5</sub> H <sub>10</sub>               | AWAS       | methyl-2-<br>butene                                            | 1-Pentene                                 | pentene+met<br>hyl butene                                      | pentenes,<br>methylbutenes                                                  | n/a                                                                                  |
| 72.063           | C <sub>3</sub> H <sub>4</sub> O <sub>2</sub> | CIMS       | acrylic acid                                                   | n/a                                       | n/a                                                            | pyruvaldehyde<br>(=methyl<br>glyoxal), acrylic<br>acid                      | n/a                                                                                  |
| 72.107           | C <sub>4</sub> H <sub>8</sub> O              | PTRMS      | methyl ethyl<br>ketone +<br>butanal + 2-<br>methylpropan<br>al | 2-butanone<br>(methyl<br>ethyl<br>ketone) | methyl ethyl<br>ketone +<br>butanal + 2-<br>methylpropan<br>al | methyl ethyl<br>ketone, 2-<br>methylpropanal,<br>butanal                    | <sup>1</sup> Methyl Ethyl<br>Ketone MEK<br>+ n-Butanal + 2-                          |



|         |                                              |       |                                 |                          |                                                         |                                               |                                                    |
|---------|----------------------------------------------|-------|---------------------------------|--------------------------|---------------------------------------------------------|-----------------------------------------------|----------------------------------------------------|
|         |                                              |       |                                 |                          |                                                         |                                               | Methylpropanal                                     |
| 72.151  | C <sub>5</sub> H <sub>12</sub>               | AWAS  | methylbutane                    | n/a                      | n/a                                                     | n-pentane                                     | n/a                                                |
| 74.079  | C <sub>3</sub> H <sub>6</sub> O <sub>2</sub> | PTRMS | hydroxy acetone/ethyl formate   | n/a                      | methyl acetate + ethyl formate + hydroxyacetone         | Hydroxyacetone, Methyl acetate, Ethyl formate | Ethyl Formate                                      |
| 81.118  | C <sub>5</sub> H <sub>7</sub> N              | PTRMS | pentene nitriles/methyl pyrrole | n/a                      | n/a                                                     | n/a                                           | 1-Methylpyrrole                                    |
| 82.102  | C <sub>5</sub> H <sub>6</sub> O              | PTRMS | methyl furan                    | n/a                      | 2-methylfuran + 3-methylfuran + general HCO             | 2-Methylfuran, 3-Methylfuran                  | <sup>2</sup> 2-Methylfuran, 3-Methylfuran          |
| 84.118  | C <sub>5</sub> H <sub>8</sub> O              | PTRMS | cyclopentanone/ isomers         | n/a                      | 3-methyl-3-butene-2-one + cyclopentanone + HCO1 isomers | 3-Methyl-3-buten-2-one, Cyclopentanone        | Cyclopentanone                                     |
| 84.162  | C <sub>6</sub> H <sub>12</sub>               | PTRMS | hexene/fragments                | 1-hexene                 | n/a                                                     | n/a                                           | <sup>2</sup> 1-Hexene, cis-2-Hexene                |
| 86.09   | C <sub>4</sub> H <sub>6</sub> O <sub>2</sub> | PTRMS | butanedione/ isomers            | 2,3-butanedione          | 2,3-butanedione + methyl acrylate + other HCO2          | 2,3-butanedione, methyl acrylate              | 2,3-Butadione                                      |
| 86.134  | C <sub>5</sub> H <sub>10</sub> O             | PTRMS | pentanone                       | n/a                      | n/a                                                     | n/a                                           | <sup>2</sup> 2-Pentanone, 3-Pentanone              |
| 86.178  | C <sub>6</sub> H <sub>14</sub>               | AWAS  | 2,3-methylpentane               | n/a                      | n/a                                                     | 3-methylpentane                               | 3-Methylpentane                                    |
| 96.085  | C <sub>5</sub> H <sub>4</sub> O <sub>2</sub> | PTRMS | furfural                        | furfural (2-furaldehyde) | 2-furfural + 3-furfural + other HCO2                    | 2-furfural (=furaldehyde), 3-furfural         | 2-Furaldehyde                                      |
| 98.189  | C <sub>7</sub> H <sub>14</sub>               | PTRMS | heptene                         | n/a                      | n/a                                                     | n/a                                           | 1-Heptene                                          |
| 100.117 | C <sub>5</sub> H <sub>8</sub> O <sub>2</sub> | PTRMS | methyl methacrylate / isomers   | n/a                      | Methyl methacrylate + other HCO2                        | Methyl methacrylate                           | Methyl Methacrylate                                |
| 100.161 | C <sub>6</sub> H <sub>12</sub> O             | PTRMS | hexanal/hexanones               | n/a                      | hexanal + hexanones                                     | Hexanones, Hexanal                            | <sup>1</sup> n-Hexanal + Hexanones                 |
| 103.124 | C <sub>7</sub> H <sub>5</sub> N              | PTRMS | benzonitrile                    | n/a                      | Benzonitrile                                            | Benzonitrile                                  | Benzenenitrile                                     |
| 106.168 | C <sub>8</sub> H <sub>10</sub>               | PTRMS | C8 aromatics                    | n/a                      | Ethyl benzene + m-xylene + p-                           | C8 Aromatics                                  | <sup>1</sup> Ethylbenzene + m,p-Xylenes + o-Xylene |

|         |                                 |       |                                           |                                                                                             |                                              |                                                         |                                                                                                                                                                                               |
|---------|---------------------------------|-------|-------------------------------------------|---------------------------------------------------------------------------------------------|----------------------------------------------|---------------------------------------------------------|-----------------------------------------------------------------------------------------------------------------------------------------------------------------------------------------------|
|         |                                 |       |                                           |                                                                                             | xylene + o-xylene                            |                                                         |                                                                                                                                                                                               |
| 112.216 | C <sub>8</sub> H <sub>16</sub>  | PTRMS | octene                                    | n/a                                                                                         | n/a                                          | n/a                                                     | 1-Octene                                                                                                                                                                                      |
| 118.135 | C <sub>8</sub> H <sub>6</sub> O | PTRMS | benzofuran                                | n/a                                                                                         | Benzofuran                                   | Benzofuran                                              | BenzofuranPI<br>T                                                                                                                                                                             |
| 118.179 | C <sub>9</sub> H <sub>10</sub>  | PTRMS | methylstyrenes/<br>propenyl benzenes      | n/a                                                                                         | Indane + methyl styrenes + propenyl benzenes | Methylstyrenes, Indane, Propenylbenzenes                | <sup>1</sup> 1-Propenylbenzene,<br>2-Methylstyrene,<br>2-Propenylbenzene,<br>3-Methylstyrene,<br>4-Methylstyrene,<br>alpha-Methylstyrene                                                      |
| 120.195 | C <sub>9</sub> H                | PTRMS | C9 aromatics                              | 1,2,3-trimethylbenzen, 1,2,4-trimethylbenzen, 1,3,5-trimethylbenzene (Simpson et al., 2011) | C9 aromatics                                 | C9 aromatics                                            | <sup>1</sup> 1,2,3-Trimethylbenzene,<br>1,2,4-Trimethylbenzene,<br>1,3,5-Trimethylbenzene,<br>1-Ethyl-2-Methylbenzene,<br>1-Ethyl-3-,4-Methylbenzene,<br>Isopropylbenzene,<br>n-Propylbenzene |
| 132.162 | C <sub>9</sub> H <sub>8</sub> O | PTRMS | methyl benzo furans                       | n/a                                                                                         | Methyl benzofuran                            | Methylbenzofurans                                       | <sup>1</sup> Methylbenzofuran isomer 1,<br>Methylbenzofuran isomer 2,<br>Methylbenzofuran isomer 3                                                                                            |
| 132.206 | C <sub>10</sub> H <sub>12</sub> | PTRMS | ethyl styrene/<br>methyl propenyl benzene | n/a                                                                                         | Methyl propenyl benzene + ethyl styrene      | Ethyl styrenes, Methylpropenylbenzenes, Butenylbenzenes | <sup>1</sup> 1-Methyl-1-Propenylbenzene,<br>Ethylstyrene                                                                                                                                      |
| 134.222 | C <sub>10</sub> H <sub>14</sub> | PTRMS | C10 Aromatics                             | n/a                                                                                         | C10 Aromatics                                | C10 Aromatics                                           | <sup>1</sup> 1,4-Diethylbenzene,                                                                                                                                                              |

|         |                                 |       |                                   |                                                   |              |              |                                                                                                                                                                             |
|---------|---------------------------------|-------|-----------------------------------|---------------------------------------------------|--------------|--------------|-----------------------------------------------------------------------------------------------------------------------------------------------------------------------------|
|         |                                 |       |                                   |                                                   |              |              | 1-Butenylbenzene, Ethyl Xylene isomer 1, Ethyl Xylene isomer 2, Isobutylbenzene, Methyl-n-Propylbenzene isomer 1, Methyl-n-Propylbenzene isomer 2, n-Butylbenzene, p-Cymene |
| 136.238 | C <sub>10</sub> H <sub>16</sub> | PTRMS | monoterpenes                      | sum of alpha + beta-pinene (Simpson et al., 2011) | monoterpenes | monoterpenes | n/a                                                                                                                                                                         |
| 148.249 | C <sub>11</sub> H <sub>16</sub> | PTRMS | C11 aromatics/pentamethyl benzene | n/a                                               | n/a          | n/a          | C11 Aromatics                                                                                                                                                               |

394

395

396 Table S9. Emission speciation profile for SAPRC11 chemical mechanism derived from normalized EFs  
 397 from the present study and compared with wildfire smoldering emission speciation profile from the EPA  
 398 SPECIATEv4.5 #95428 dataset. Note that SESQ (sesquiterpene), WSOC (water soluble organic carbon)  
 399 and IVOC are non-standard SAPRC11 mechanism species. Please refer to Carter and Heo (2013) for  
 400 mechanism species definition.

| <b>SAPRC11 Lumped Species Name</b> | <b>Molecular Weight (g/mol)</b> | <b>Normalized Mass Fraction (Hayden et al.)</b> | <b>Normalized Mass Fraction (SPECIATEv4.5 #95428)</b> |
|------------------------------------|---------------------------------|-------------------------------------------------|-------------------------------------------------------|
| CCOOH                              | 60.05                           | 0.052                                           | 0.031                                                 |
| ACET                               | 58.08                           | 0.012                                           | 0.0072                                                |
| ACYL                               | 26.03728                        | 0.0042                                          | 0.00059                                               |
| ALK1                               | 30.07                           | 0.021                                           | 0.011                                                 |
| ALK2                               | 36.73                           | 0.0098                                          | 0.0043                                                |
| ALK3                               | 58.61                           | 0.011                                           | 0.0077                                                |
| ALK4                               | 77.6                            | 0.0035                                          | 0.030                                                 |
| ALK5                               | 118.89                          | 0.0032                                          | 0.28                                                  |
| ARO1                               | 95.16                           | 0.016                                           | 0.034                                                 |
| ARO2                               | 118.72                          | 0.022                                           | 0.067                                                 |
| BACL                               | 86.09                           | 0.013                                           | 0.0050                                                |
| BALD                               | 106.13                          | 0.0010                                          | 0.0034                                                |
| BENZ                               | 78.11                           | 0.0071                                          | 0.0035                                                |
| CATL                               | 110.11064                       | 0.0017                                          | 0.014                                                 |
| CCHO                               | 44.05                           | 0.017                                           | 0.023                                                 |
| CH4                                | 16.043                          | 0.13                                            | 0.044                                                 |
| CRES                               | 108.14                          | 0.0014                                          | 0.0027                                                |
| ETHE                               | 28.05                           | 0.023                                           | 0.0065                                                |
| HCOOH                              | 46.03                           | 0.0026                                          | 0.0038                                                |
| GLY                                |                                 |                                                 | 0.000046                                              |
| HCHO                               | 30.03                           | 0.016                                           | 0.0084                                                |
| IPRD                               | 100.12                          | 0.00010                                         | 0.0037                                                |
| ISOP                               | 68.12                           | 0.0064                                          | 0.00041                                               |
| MACR                               | 70.09                           | 0.0054                                          | 0.0044                                                |
| MEK                                | 72.11                           | 0.0035                                          | 0.0028                                                |
| MEOH                               | 32.04                           | 0.030                                           | 0.016                                                 |
| MGLY                               |                                 |                                                 | 0.000037                                              |
| MVK                                | 70.09                           | 0.0030                                          | 0.019                                                 |
| NROG                               | 1                               | 0.00017                                         | 0.13                                                  |
| NVOL                               | 1                               | 0.000010                                        |                                                       |
| OLE1                               | 72.34                           | 0.045                                           | 0.049                                                 |
| OLE2                               | 75.78                           | 0.0063                                          | 0.025                                                 |
| PACD                               | 74.08                           | 0.019                                           | 0.00047                                               |
| PHEN                               | 94.11124                        | 0.0029                                          | 0.0054                                                |
| PROD2                              | 116.16                          | 0.0023                                          | 0.027                                                 |

|      |             |          |        |
|------|-------------|----------|--------|
| RCHO | 58.08       | 0.00015  | 0.0035 |
| TERP | 136.24      | 0.0061   | 0.032  |
| XYNL | 122.1644    | 0.00043  |        |
| SESQ | 204.35      | 0.000033 |        |
| WSOC | 227         | 0.056    |        |
| IVOC | 227.3333333 | 0.042    |        |

401

402

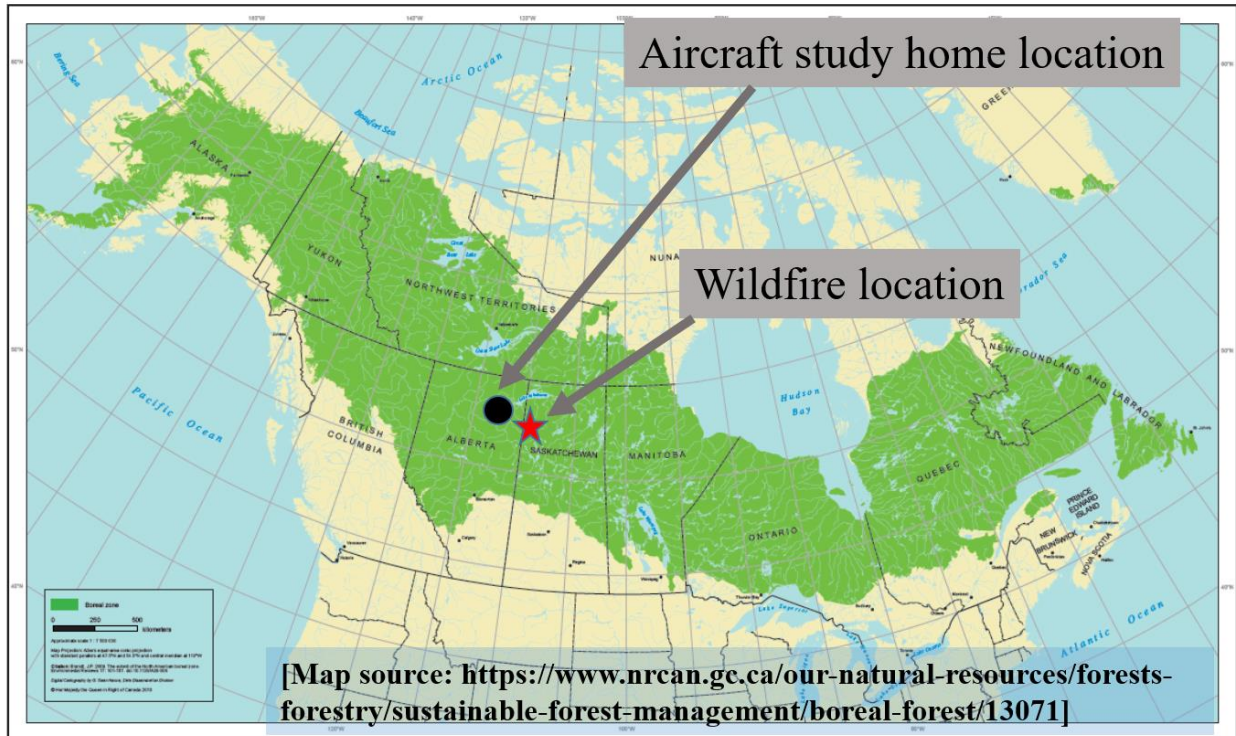

403

404 Figure S1. Map showing the home location of the airborne study at Fort McMurray, Alberta and the  
 405 location of the wildfire in Saskatchewan. The green shaded region shows the extent of the boreal forest  
 406 coverage across Canada and Alaska.

407

408

409

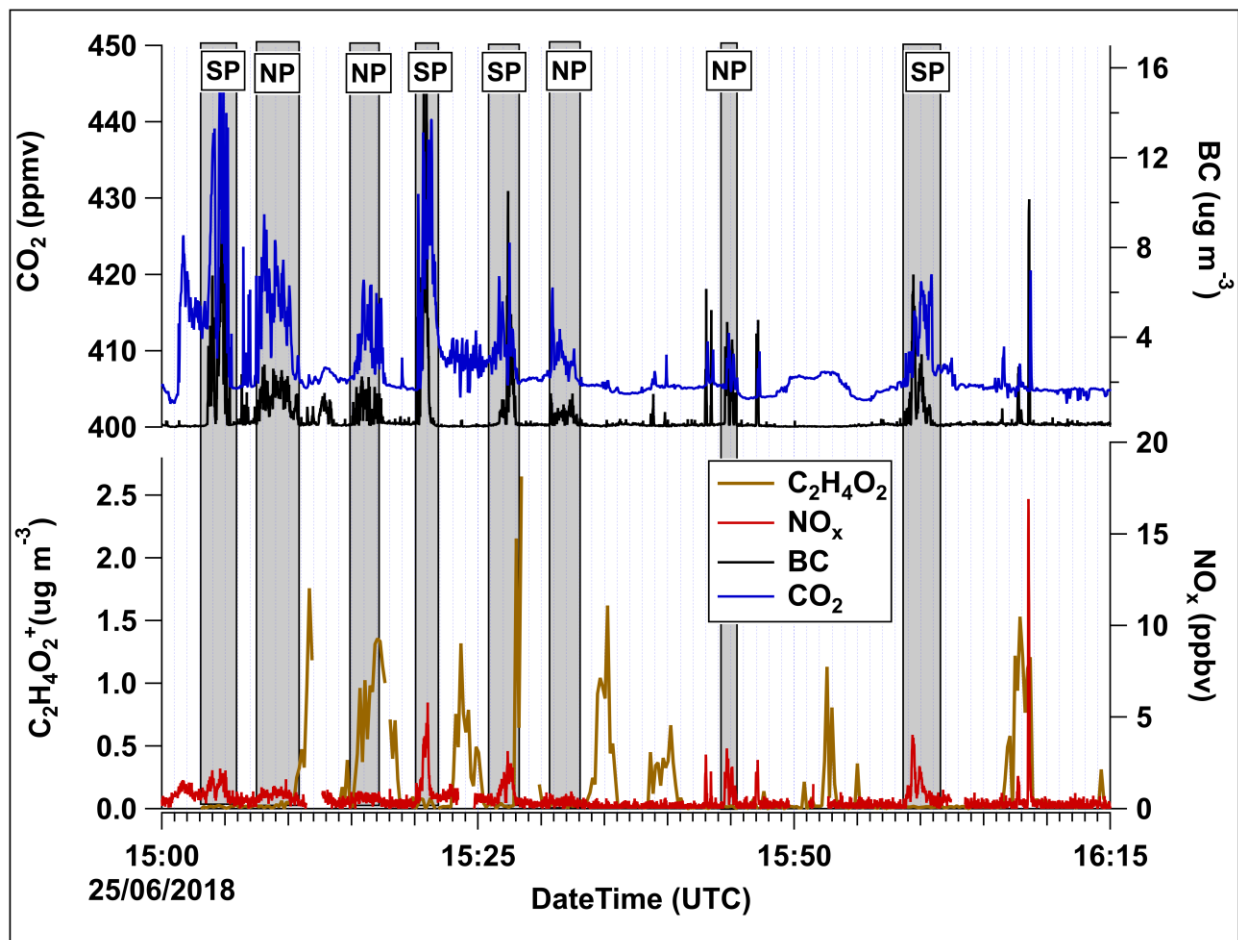

410  
 411 Figure S2. Time series of CO<sub>2</sub>, BC and NO<sub>x</sub> mixing ratios, and C<sub>2</sub>H<sub>4</sub>O<sub>2</sub><sup>+</sup> (levoglucosan fragment derived  
 412 from the AMS) concentrations for Screen 1. The in-plume portions are indicated by the vertical grey  
 413 bars. The aircraft flew back and forth across the plumes at increasing altitudes to complete five transects;  
 414 a transect represents one pass across the SP and NP at the same altitude.

415  
 416  
 417  
 418  
 419  
 420  
 421  
 422  
 423  
 424

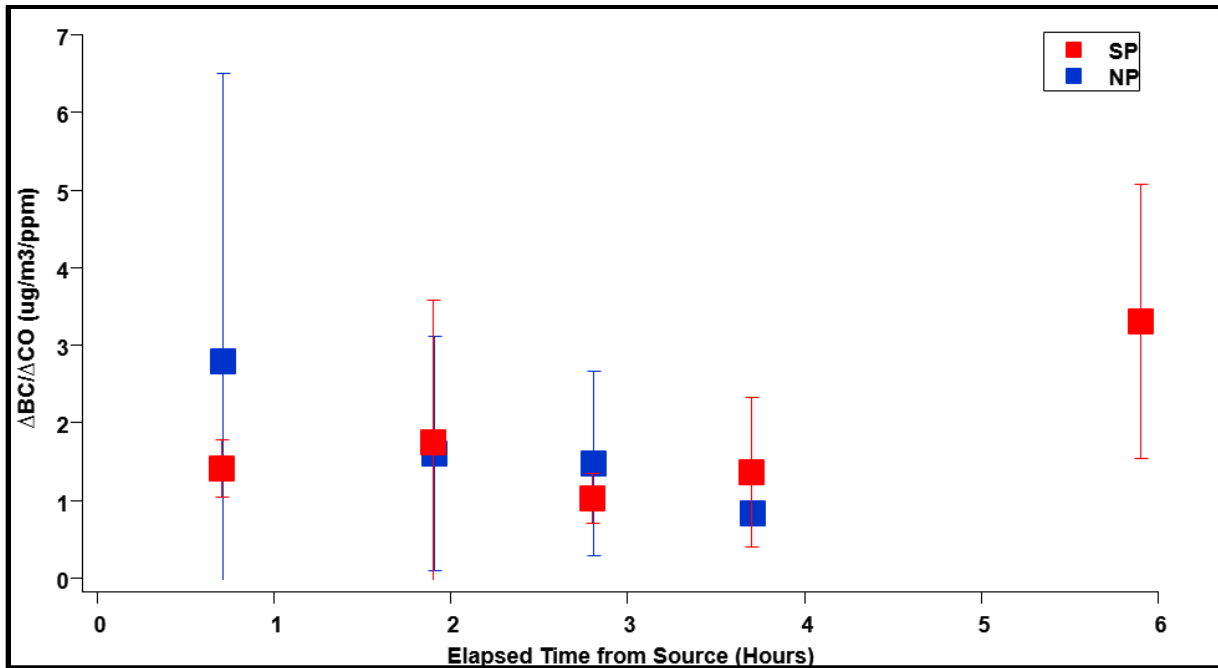

425

426 Figure S3. Using  $\Delta BC/\Delta CO$  (Selimovic et al., 2019) as an indicator of plume mixing downwind of the  
 427 Lac LaLoche fire. The squares show the average and the vertical lines the standard deviation for the  
 428 transects within the mixed layer for each screen.

429



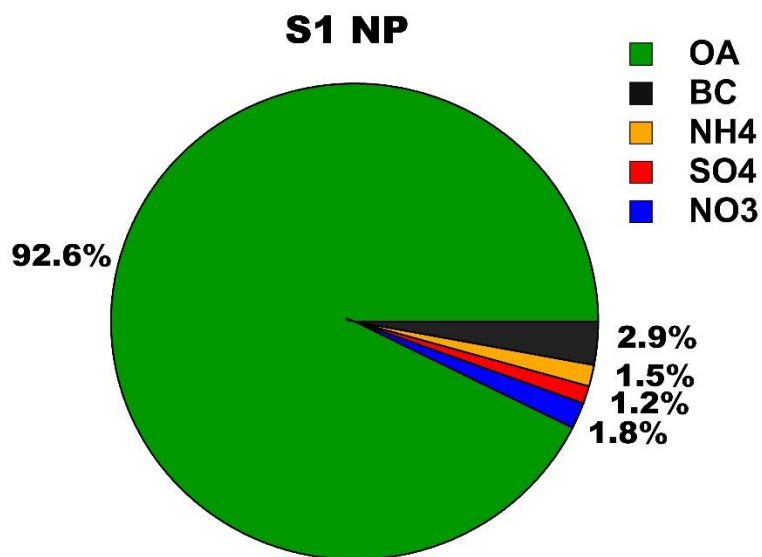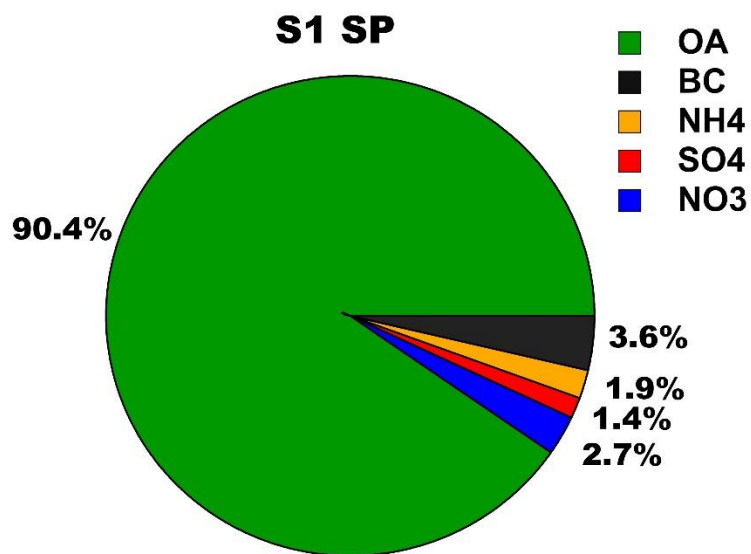

430  
 431 Figure S4. Percent contribution from individually measured particle-phase species for the NP and SP  
 432 including p-organics (OA), black carbon (BC), ammonium (NH<sub>4</sub>), sulphate (SO<sub>4</sub>) and nitrate (NO<sub>3</sub>), based  
 433 on mass concentrations.

434

435

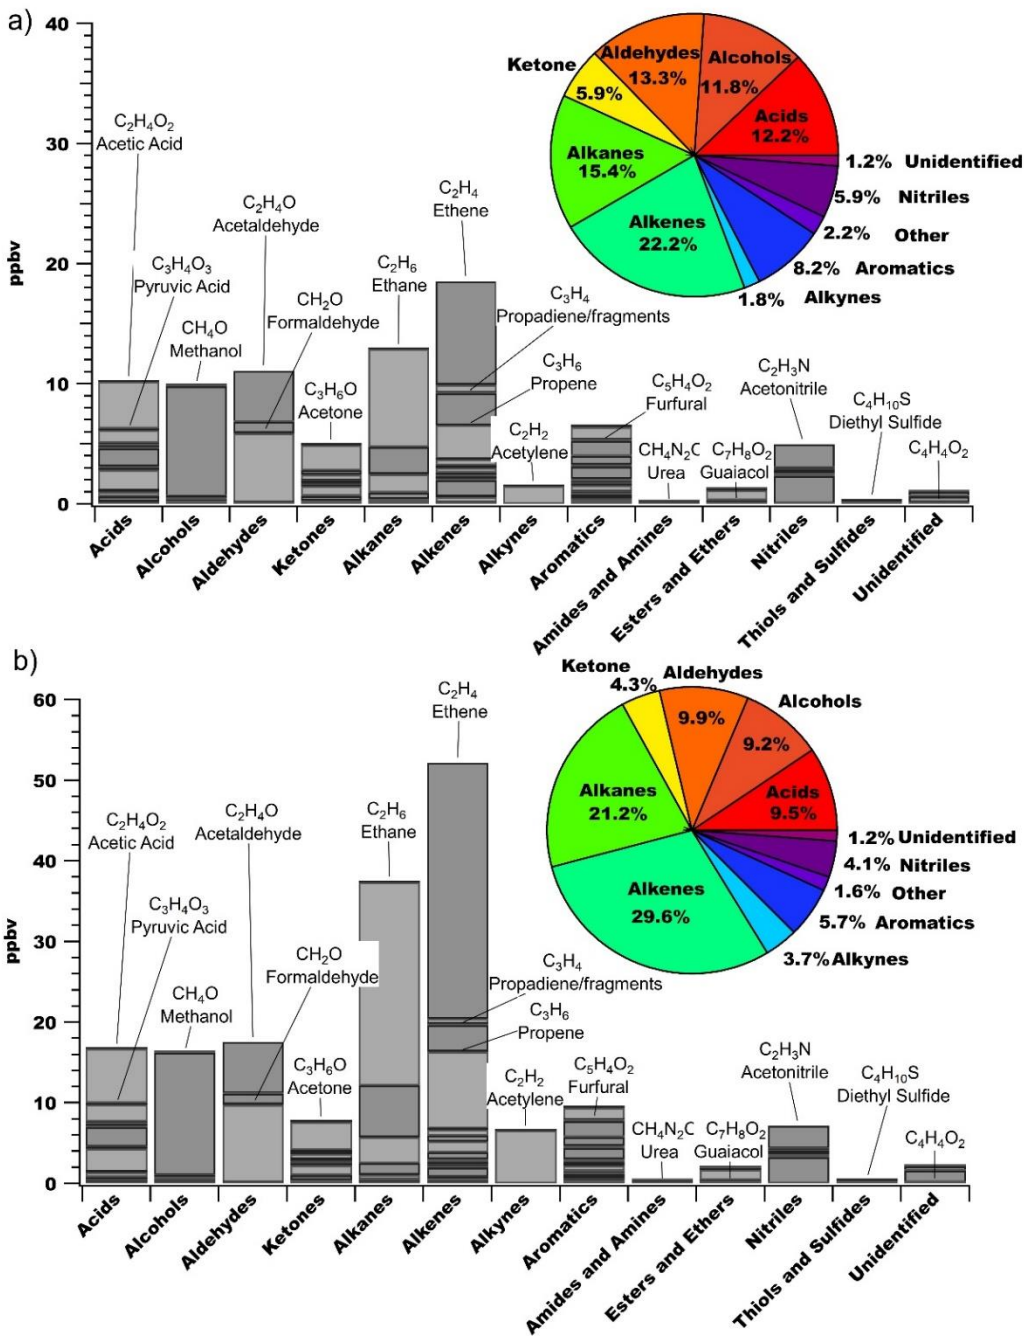

436

437 Figure S5. Background-subtracted mixing ratios of individually measured NMOGs from the PTRMS,  
 438 CIMS and AWAS are shown for thirteen chemical classes for the a) NP and b) SP. In some cases,  
 439 compounds are double- (or triple-) counted if they can be identified in more than one category. For  
 440 example, phenol is an alcohol + an aromatic; guaiacol is an alcohol + an ether + an aromatic. In the pie  
 441 chart, the *Other* category includes amides, amines, ethers, thiols and sulfides. The *Unidentified* category  
 442 contains molecular formulas detected but the compound(s) could not be identified.

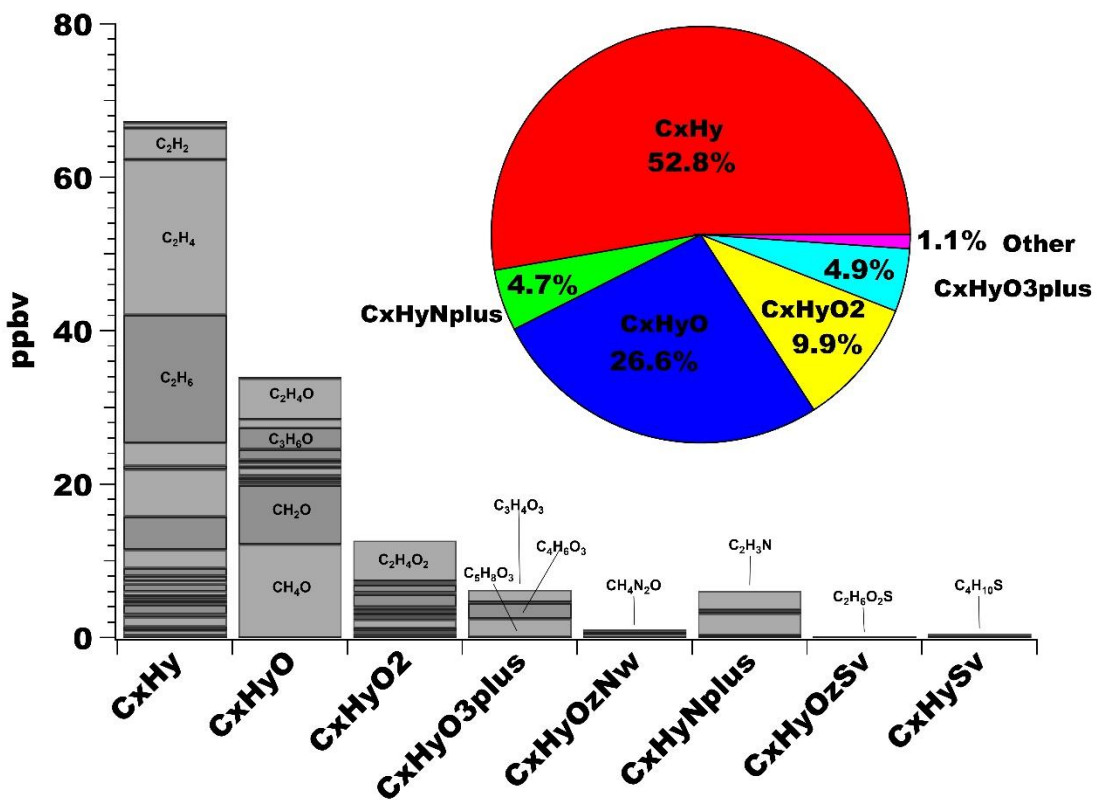

443

444 Figure S6. Background-subtracted average mixing ratios of individually measured NMOGs from the  
 445 PTRMS, CIMS and AWAS are shown for molecular formulae classes. The *Unidentified* category  
 446 contains molecular formulas detected but the compound(s) could not be identified.

447

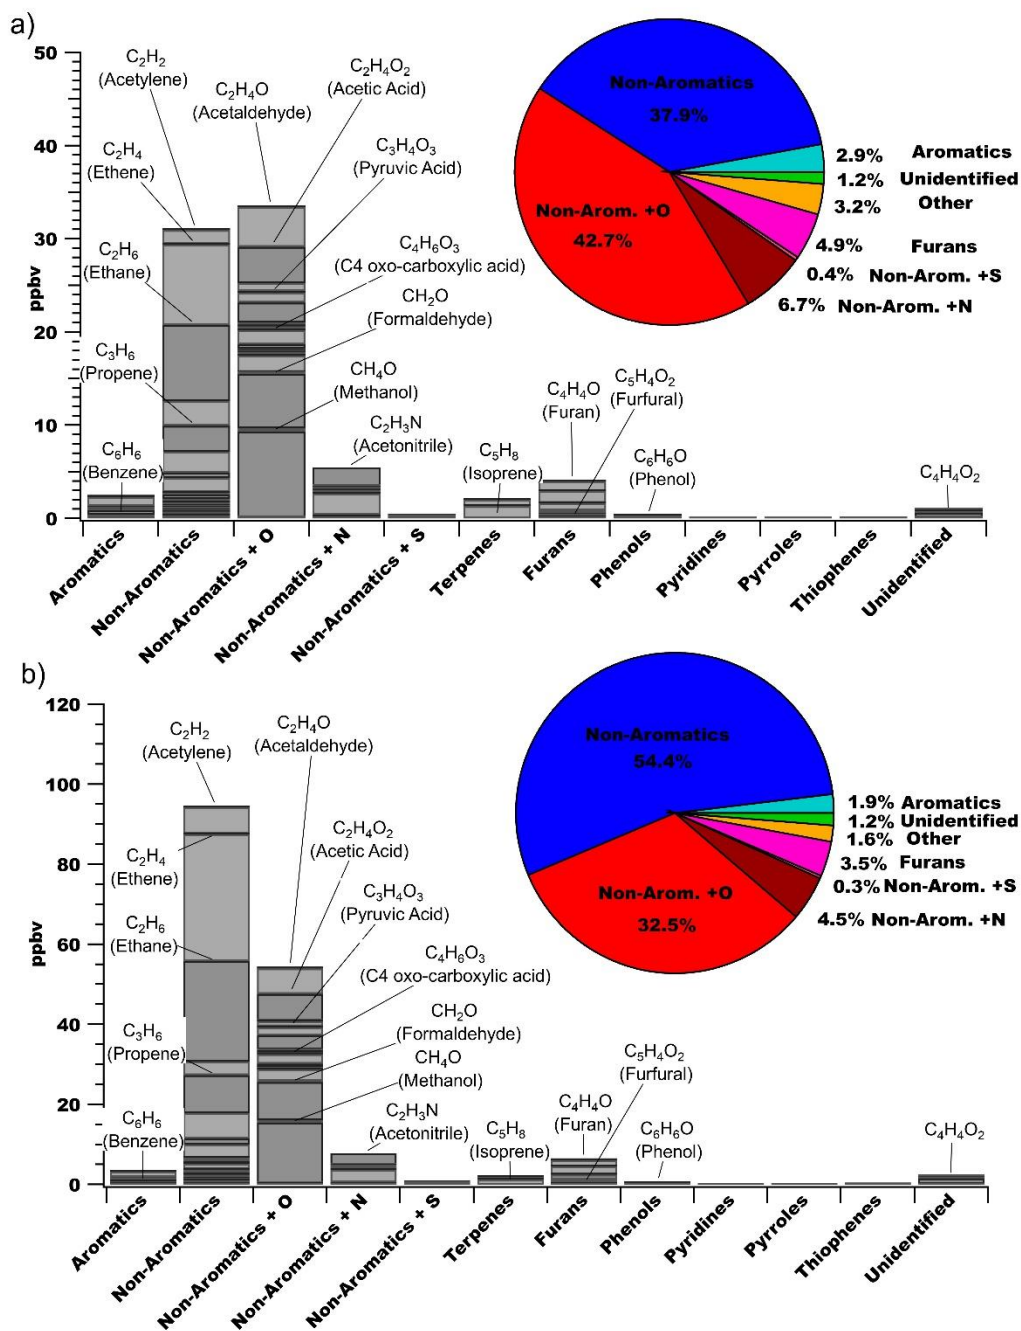

448  
 449 Figure S7. Average mixing ratios of individually measured NMOGs from the PTRMS, CIMS and  
 450 AWAS by structural group for the a) NP and b) SP. The *Other* category is the sum of terpenes, phenols,  
 451 pyridines, pyrroles and thiophenes.

452

453

454

455

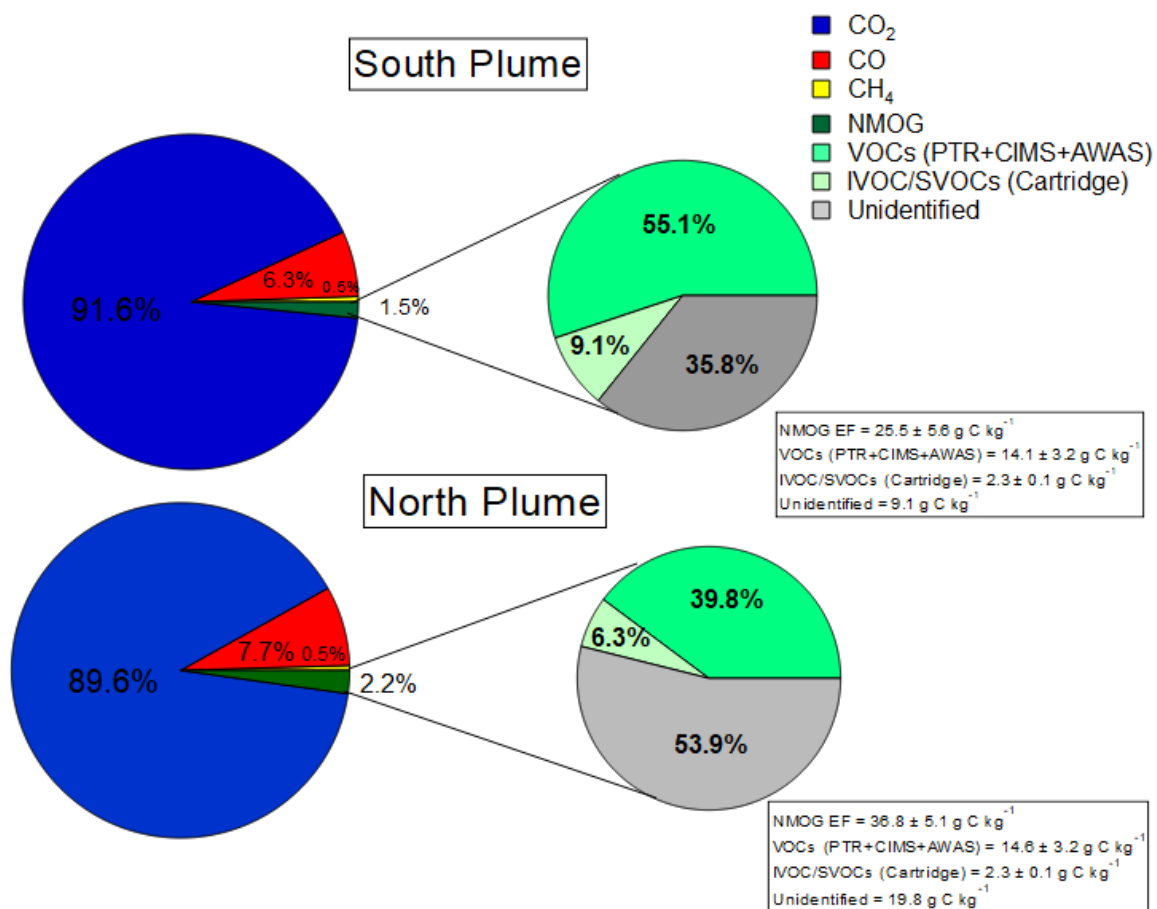

456

457

458 Figure S8. Percent contributions of carbon-containing compounds to the TC based on EFs (in terms of  
459 carbon fraction) for the SP and NP. Pie charts on the right show the percent breakdown of the measured  
460 NMOGs and the remaining unidentified portion. Note, the I/SVOC measurements represent the  
461 integrated average encompassing both plumes.

462

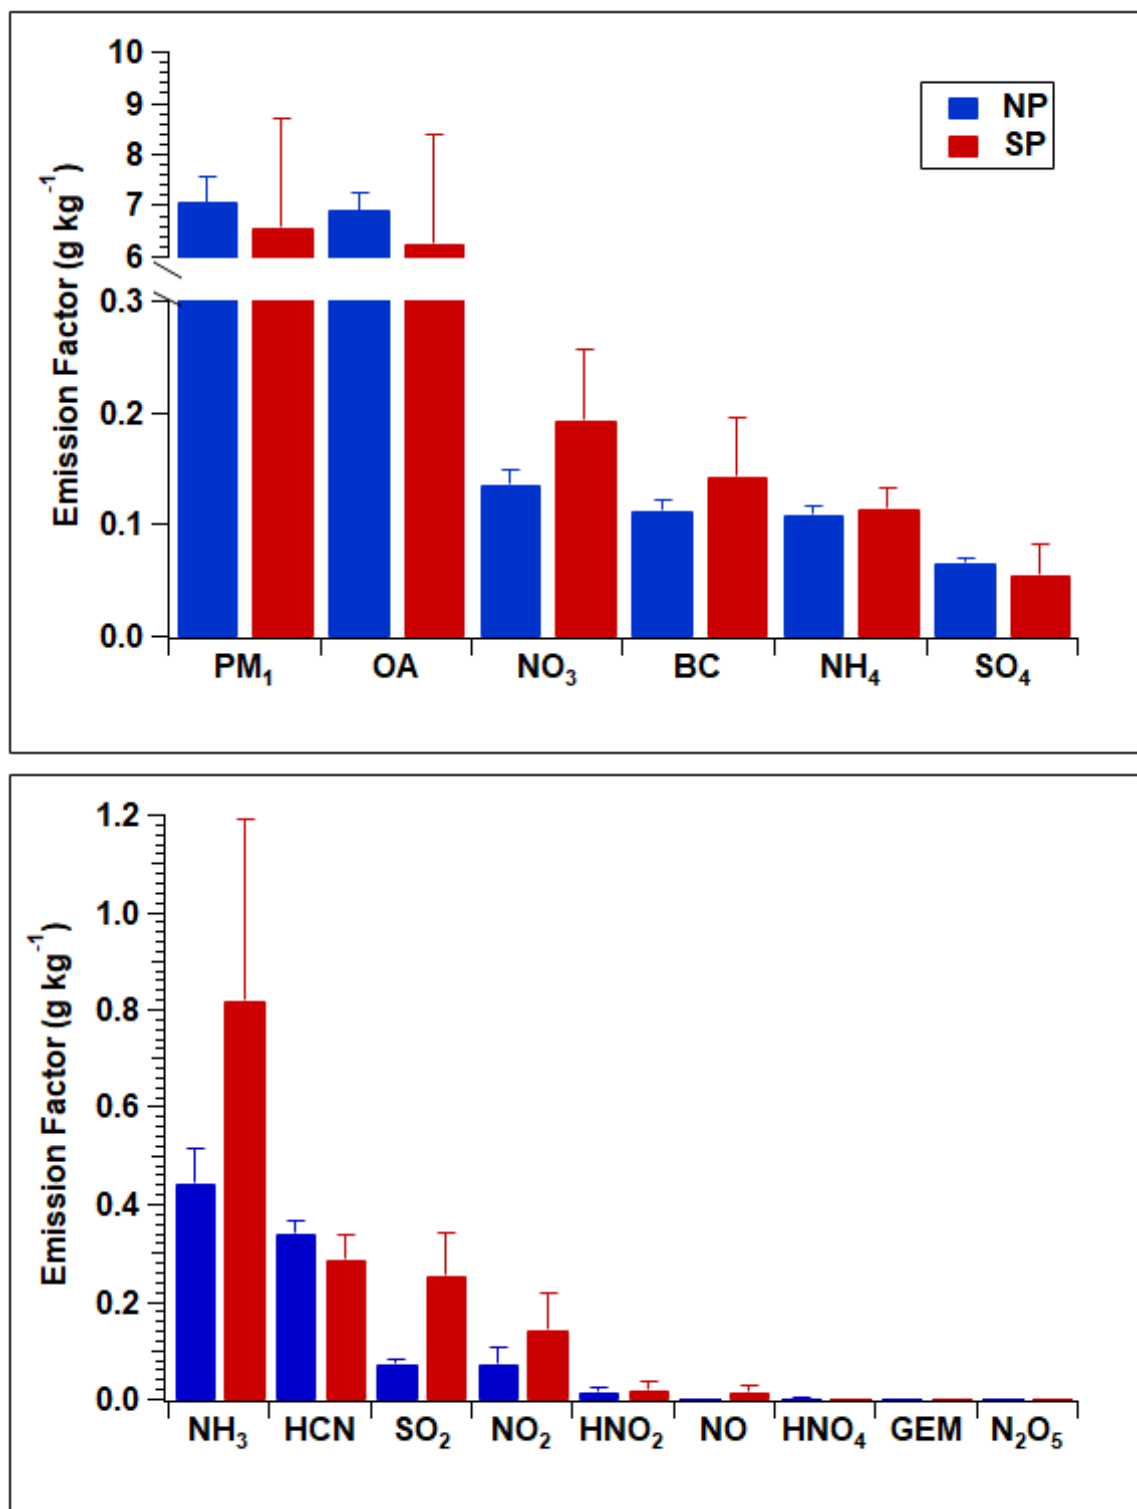

464

465 Figure S9. Emission factors (EF) (g kg<sup>-1</sup>) for the SP and NP determined from measurements of a) particle  
 466 species; and b) inorganic gas-phase species.

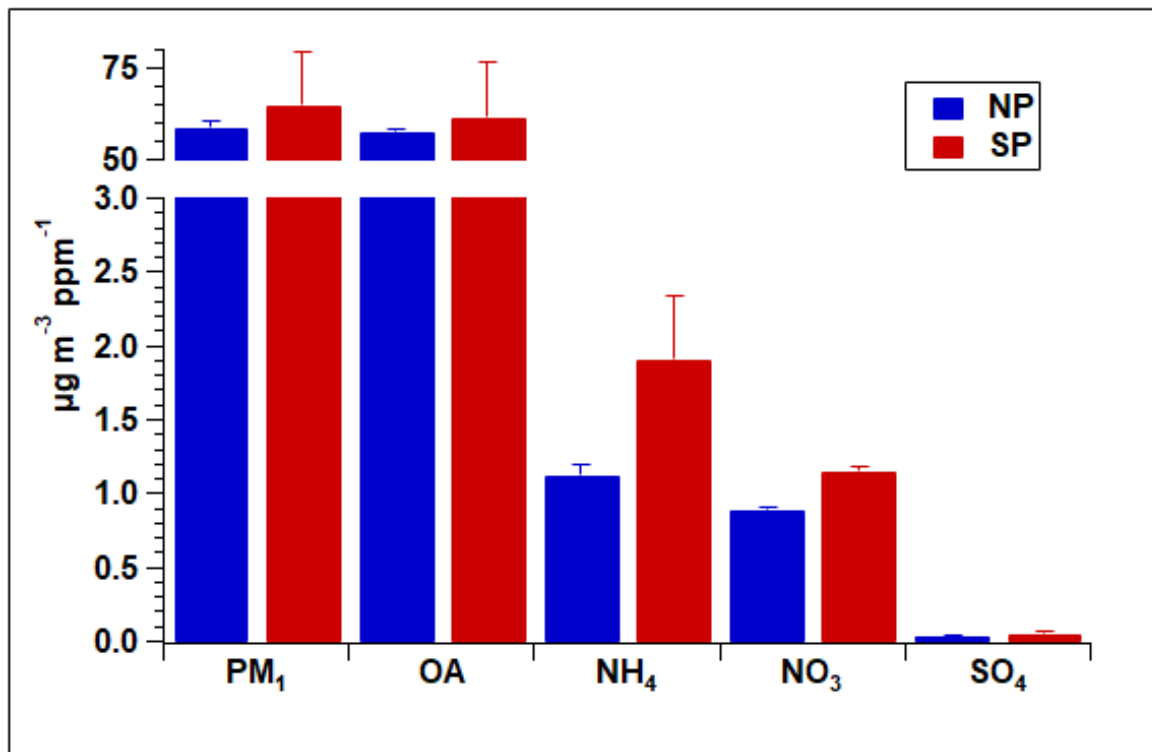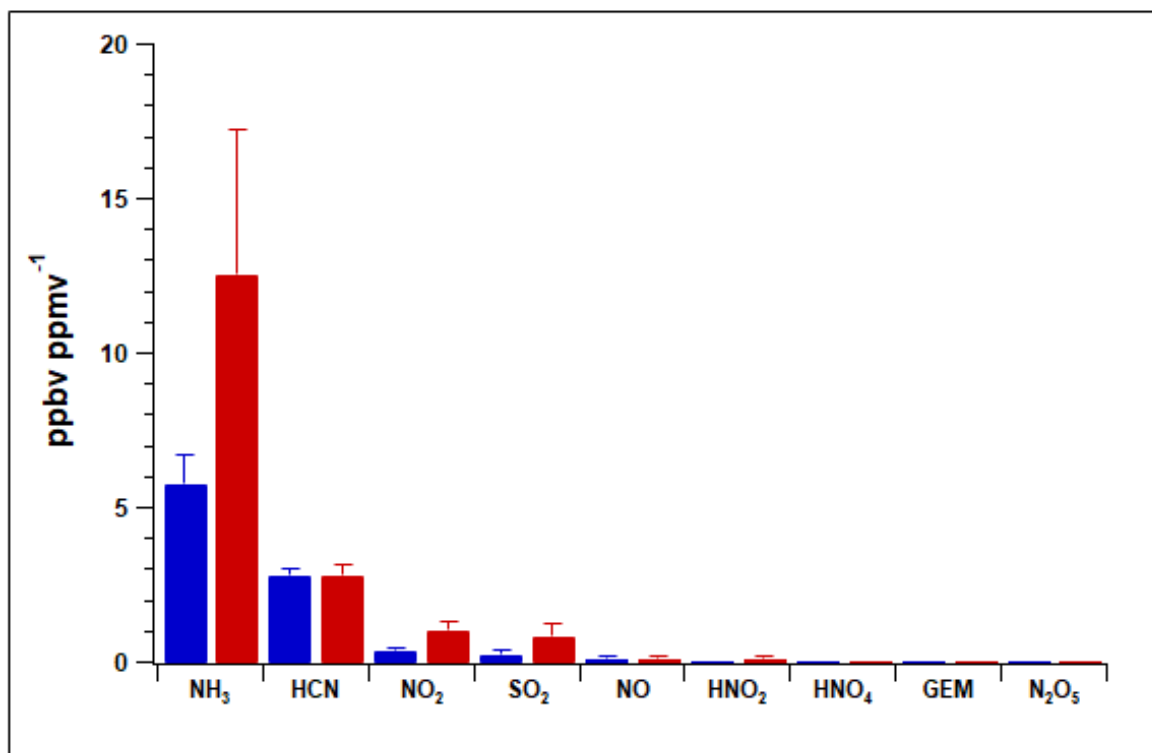

467  
 468 Figure S10. Emission ratios (ER) for the SP and NP determined from measurements of a) particle species  
 469 ( $\mu\text{g m}^{-3} \text{ppm}^{-1}$ ); and b) inorganic gas-phase species ( $\text{ppbv ppm}^{-1}$ ).

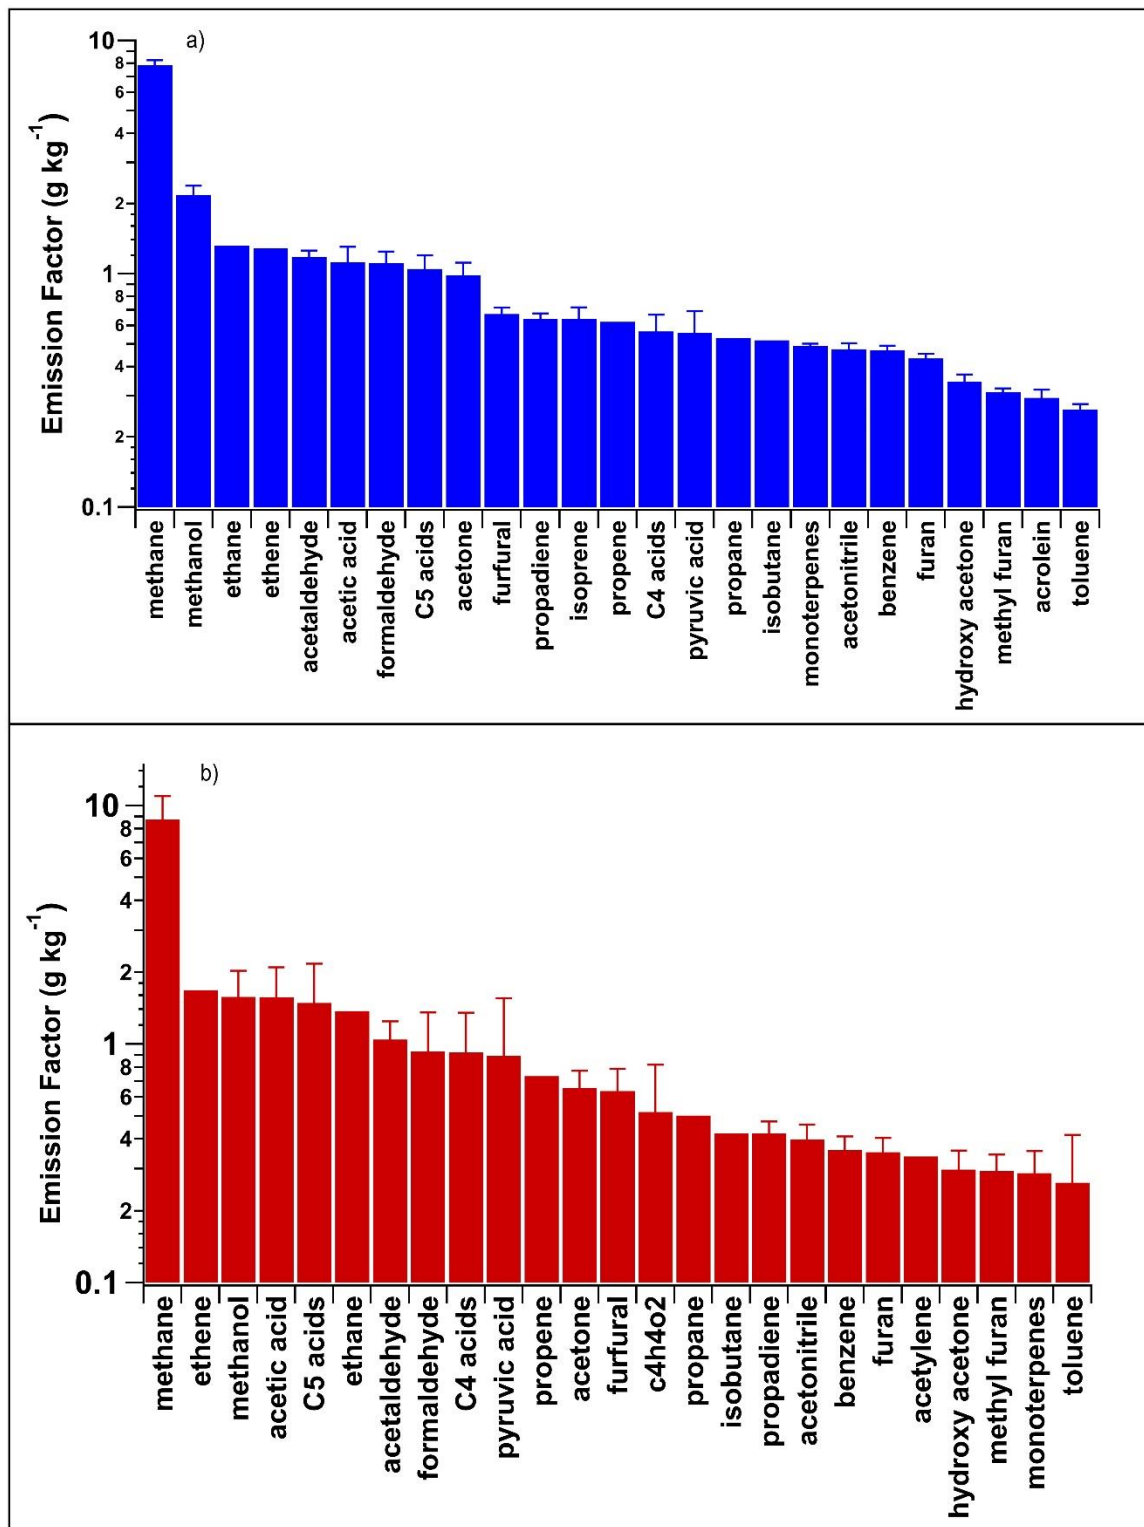

470

471 Figure S11. Emission factors (EF) ( $\text{g kg}^{-1}$ ) for the a) NP and b) SP for the top 25 measured gas-phase  
 472 organic species. C5 acids = C5 oxo-carboxylic acids, C4 acids = C4 oxo-carboxylic acids, propadiene =  
 473 fragments/propadiene, hydroxy acetone = hydroxy acetone/ ethyl formate.

474



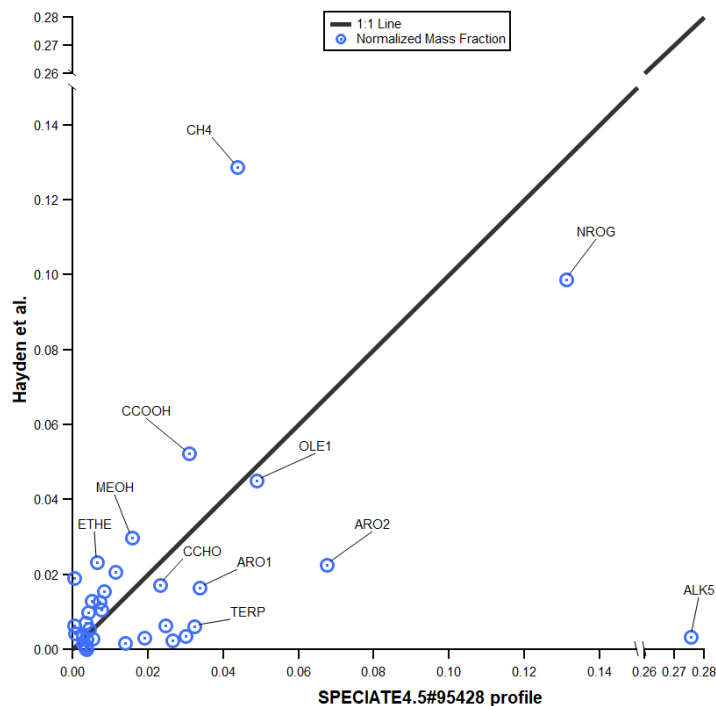

475

476 Figure S12. Comparison of the organic gas speciation profile determined from this study (Hayden et al.)  
 477 with that used by the SAPRC-11 mechanism (SPECIATE4.5#95428). EFs in the present study were  
 478 mapped to the SAPRC-11 model mechanism species and normalized to the NMOG<sub>T</sub> (which includes the  
 479 unidentified mass fraction), to create the total organic gas mass speciation profile. The normalized model  
 480 species fraction is plotted against similarly treated mass speciation profile from the EPA SPECIATEv4.5  
 481 #95428 for wildfire smoldering emissions. Note that for comparison purposes the non-standard SAPRC-  
 482 11 species in the present study are lumped, such that SESQ is summed with TERP, and IVOC, WSOC  
 483 and NVOL are summed with NROG.

484

485

486

487

488

489

490

491

492

493

494

495

496 **References**

- 497 Akagi, S. K., Yokelson, R. J., Wiedinmyer, C., Alvarado, M. J., Reid, J. S., Karl, T., Crounse, J. D., and  
498 Wennberg, P. O.: Emission factors for open and domestic biomass burning for use in atmospheric models,  
499 *Atmos. Chem. Phys.*, 11, 4039-4072, <https://doi.org/10.5194/acp-11-4039-2011>, 2011.
- 500 Allan, J. D., Jimenez, J. L., Williams, P. I., Alfarra, M. R., Bower, K. N., Jayne, J. T., Coe, H., and  
501 Worsnop, D. R.: Quantitative sampling using an Aerodyne Aerosol Mass Spectrometer 1. Techniques of  
502 data interpretation and error analysis, *J. Geophys. Res.-Atmos.*, 108, 4090,  
503 <https://doi.org/10.1029/2002JD002358>, 2003.
- 504 Andreae, M. O. and Merlet, P.: Emission of trace gases and aerosols from biomass burning, *Global*  
505 *Biogeochem. Cy.*, 15, 955-966, <https://doi.org/10.1029/2000GB001382>, 2001.
- 506 Baray, S., Darlington, A., Gordon, M., Hayden, K. L., Leithead, A., Li, S. M., Liu, P. S. K., Mittermeier,  
507 R. L., Moussa, S. G., O'Brien, J., Staebler, R., Wolde, M., Worthy, D., and McLaren, R.: Quantification  
508 of methane sources in the Athabasca Oil Sands Region of Alberta by aircraft mass balance, *Atmos. Chem.*  
509 *Phys.*, 18, 7361-7378, <https://doi.org/10.5194/acp-18-7361-2018>, 2018.
- 510 Baumgardner, D., Kok, G., and Raga, G.: Warming of the Arctic lower stratosphere by light absorbing  
511 particles, *Geophys. Res. Lett.*, 31, L06117, <https://doi.org/10.1029/2003GL018883>, 2004.
- 512 Bertschi, I., Yokelson, R. J., Ward, D. E., Babbitt, R. E., Susott, R. A., Goode, J. G., and Hao, W. M.:  
513 Trace gas and particle emissions from fires in large diameter and belowground biomass fuels, *J. Geophys.*  
514 *Res.-Atmos.*, 108, 8472, <https://doi.org/10.1029/2002JD002100>, 2003.
- 515 Cai, Y., Montague, D. C., Mooiweer-Bryan, W., and Deshler, T.: Performance characteristics of the ultra  
516 high sensitivity aerosol spectrometer for particles between 55 and 800nm: Laboratory and field studies, *J.*  
517 *Aerosol Sci.*, 39, 759-769, <https://doi.org/10.1016/j.jaerosci.2008.04.007>, 2008.
- 518 Clyne, M. A. A., Thrush, B. A., and Wayne, R. P.: Kinetics of the chemiluminescent reaction between  
519 nitric oxide and ozone, *Trans. Faraday Soc.*, 60, 359-370, <https://doi.org/10.1039/TF9646000359>, 1964.
- 520 Cole, A. S., Steffen, A., Eckley, C. S., Narayan, J., Pilote, M., Tordon, R., Graydon, J. A., St. Louis, V.  
521 L., Xu, X., and Branfireun, B. A.: A survey of mercury in air and precipitation across Canada: Patterns  
522 and trends, *Atmosphere*, 5, 635-668, <https://doi.org/10.3390/atmos5030635>, 2014.
- 523 DeCarlo, P. F., Dunlea, E. J., Kimmel, J. R., Aiken, A. C., Sueper, D., Crounse, J., Wennberg, P. O.,  
524 Emmons, L., Shinozuka, Y., Clarke, A., Zhou, J., Tomlinson, J., Collins, D. R., Knapp, D., Weinheimer,  
525 A. J., Montzka, D. D., Campos, T., and Jimenez, J. L.: Fast airborne aerosol size and chemistry  
526 measurements above Mexico City and Central Mexico during the MILAGRO campaign, *Atmos. Chem.*  
527 *Phys.*, 8, 4027-4048, <https://doi.org/10.5194/acp-8-4027-2008>, 2008.
- 528 Ditto, J. C., He, M., Hass-Mitchell, T. N., Moussa, S. G., Hayden, K., Li, S. M., Liggio, J., Leithead, A.,  
529 Lee, P., Wheeler, M. J., Wentzell, J. J. B., and Gentner, D. R.: Atmospheric evolution of emissions from a  
530 boreal forest fire: the formation of highly functionalized oxygen-, nitrogen-, and sulfur-containing organic  
531 compounds, *Atmos. Chem. Phys.*, 21, 255-267, <https://doi.org/10.5194/acp-21-255-2021>, 2021.
- 532 Drewnick, F., Schwab, J. J., Jayne, J. T., Canagaratna, M., Worsnop, D. R., and Demerjian, K. L.:  
533 Measurement of ambient aerosol composition during the PMTACS-NY 2001 using an aerosol mass  
534 spectrometer. Part I: Mass concentrations special issue of aerosol science and technology on findings

535 from the Fine Particulate Matter Supersites Program, *Aerosol Sci. Tech.*, 38, 92-103,  
536 <https://doi.org/10.1080/02786820390229507>, 2004.

537 Dunlea, E. J., DeCarlo, P. F., Aiken, A. C., Kimmel, J. R., Peltier, R. E., Weber, R. J., Tomlinson, J.,  
538 Collins, D. R., Shinzuka, Y., McNaughton, C. S., Howell, S. G., Clarke, A. D., Emmons, L. K., Apel, E.  
539 C., Pfister, G. G., van Donkelaar, A., Martin, R. V., Millet, D. B., Heald, C. L., and Jimenez, J. L.:  
540 Evolution of Asian aerosols during transpacific transport in INTEX-B, *Atmos. Chem. Phys.*, 9, 7257-  
541 7287, <https://doi.org/10.5194/acp-9-7257-2009>, 2009.

542 Fehsenfeld, F. C., Dickerson, R. R., Hübler, G., Luke, W. T., Nunnermacker, L. J., Williams, E. J.,  
543 Roberts, J. M., Calvert, J. G., Curran, C. M., Delany, A. C., Eubank, C. S., Fahey, D. W., Fried, A.,  
544 Gandrud, B. W., Langford, A. O., Murphy, P. C., Norton, R. B., Pickering, K. E., and Ridley, B. A.: A  
545 ground-based intercomparison of NO, NO<sub>x</sub>, and NO<sub>y</sub> measurement techniques, *J. Geophys. Res.-Atmos.*,  
546 92, 14710-14722, <https://doi.org/10.1029/JD092iD12p14710>, 1987.

547 Hatch, L. E., Yokelson, R. J., Stockwell, C. E., Veres, P. R., Simpson, I. J., Blake, D. R., Orlando, J. J.,  
548 and Barsanti, K. C.: Multi-instrument comparison and compilation of non-methane organic gas emissions  
549 from biomass burning and implications for smoke-derived secondary organic aerosol precursors, *Atmos.*  
550 *Chem. Phys.*, 17, 1471-1489, <https://doi.org/10.5194/acp-17-1471-2017>, 2017.

551 Jimenez, J. L., Jayne, J. T., Shi, Q., Kolb, C. E., Worsnop, D. R., Yourshaw, I., Seinfeld, J. H., Flagan, R.  
552 C., Zhang, X., Smith, K. A., Morris, J. W., and Davidovits, P.: Ambient aerosol sampling using the  
553 Aerodyne Aerosol Mass Spectrometer, *J. Geophys. Res.-Atmos.*, 108, 8425,  
554 <https://doi.org/10.1029/2001JD001213>, 2003.

555 Khare, P., Marcotte, A., Sheu, R., Walsh, A. N., Ditto, J. C., and Gentner, D. R.: Advances in offline  
556 approaches for trace measurements of complex organic compound mixtures via soft ionization and high-  
557 resolution tandem mass spectrometry, *J. Chromatogr. A*, 1598, 163-  
558 174, <https://doi.org/10.1016/j.chroma.2019.03.037>, 2019.

559 Kleinman, L. I., Springston, S. R., Daum, P. H., Lee, Y. N., Nunnermacker, L. J., Senum, G. I., Wang, J.,  
560 Weinstein-Lloyd, J., Alexander, M. L., Hubbe, J., Ortega, J., Canagaratna, M. R., and Jayne, J.: The time  
561 evolution of aerosol composition over the Mexico City plateau, *Atmos. Chem. Phys.*, 8, 1559-1575,  
562 <https://doi.org/10.5194/acp-8-1559-2008>, 2008.

563 Koss, A. R., Sekimoto, K., Gilman, J. B., Selimovic, V., Coggon, M. M., Zarzana, K. J., Yuan, B.,  
564 Lerner, B. M., Brown, S. S., Jimenez, J. L., Krechmer, J., Roberts, J. M., Warneke, C., Yokelson, R. J.,  
565 and de Gouw, J.: Non-methane organic gas emissions from biomass burning: identification,  
566 quantification, and emission factors from PTR-ToF during the FIREX 2016 laboratory experiment,  
567 *Atmos. Chem. Phys.*, 18, 3299-3319, <https://doi.org/10.5194/acp-18-3299-2018>, 2018.

568 Kupc, A., Williamson, C., Wagner, N. L., Richardson, M., and Brock, C. A.: Modification, calibration,  
569 and performance of the Ultra-High Sensitivity Aerosol Spectrometer for particle size distribution and  
570 volatility measurements during the Atmospheric Tomography Mission (ATom) airborne campaign,  
571 *Atmos. Meas. Tech.*, 11, 369-383, <https://doi.org/10.5194/amt-11-369-2018>, 2018.

572 Lee, B. H., Lopez-Hilfiker, F. D., Mohr, C., Kurtén, T., Worsnop, D. R., and Thornton, J. A.: An Iodide-  
573 Adduct High-Resolution Time-of-Flight Chemical-Ionization Mass Spectrometer: Application to  
574 Atmospheric Inorganic and Organic Compounds, *Environmental Science & Technology*, 48, 6309-6317,  
575 [10.1021/es500362a](https://doi.org/10.1021/es500362a), 2014.

576 Lee, B. H., Lopez-Hilfiker, F. D., Veres, P. R., McDuffie, E. E., Fibiger, D. L., Sparks, T. L., Ebben, C.  
577 J., Green, J. R., Schroder, J. C., Campuzano-Jost, P., Iyer, S., D'Ambro, E. L., Schobesberger, S., Brown,  
578 S. S., Wooldridge, P. J., Cohen, R. C., Fiddler, M. N., Bililign, S., Jimenez, J. L., Kurtén, T., Weinheimer,  
579 A. J., Jaegle, L., and Thornton, J. A.: Flight Deployment of a High-Resolution Time-of-Flight Chemical  
580 Ionization Mass Spectrometer: Observations of Reactive Halogen and Nitrogen Oxide Species, *Journal of*  
581 *Geophysical Research: Atmospheres*, 123, 7670-7686, <https://doi.org/10.1029/2017JD028082>, 2018.

582 Leifer, I., Melton, C. Tratt, D.M., Buckland, K.N., Clarisse, L., Coheur, P., Frash, J., Gupta, M., Johnson,  
583 P.D., Leen, J.B., Van Damme, M., Whitburn, S., and Yurganov, L.: Remote sensing and in situ  
584 measurements of methane and ammonia emissions from a megacity dairy complex: Chino, CA, *Environ.*  
585 *Poll.*, 221, 37-51, <https://doi.org/10.1016/j.envpol.2016.09.083>, 2017.

586 Lerner, B. M., Gilman, J. B., Aikin, K. C., Atlas, E. L., Goldan, P. D., Graus, M., Hendershot, R.,  
587 Isaacman-VanWertz, G. A., Koss, A., Kuster, W. C., Lueb, R. A., McLaughlin, R. J., Peischl, J., Sueper,  
588 D., Ryerson, T. B., Tokarek, T. W., Warneke, C., Yuan, B., and de Gouw, J. A.: An improved, automated  
589 whole air sampler and gas chromatography mass spectrometry analysis system for volatile organic  
590 compounds in the atmosphere, *Atmos. Meas. Tech.*, 10, 291-313, [https://doi.org/10.5194/amt-10-291-](https://doi.org/10.5194/amt-10-291-2017)  
591 2017, 2017.

592 Li, S.-M., Leithead, A., Moussa, S. G., Liggio, J., Moran, M. D., Wang, D., Hayden, K., Darlington, A.,  
593 Gordon, M., Staebler, R., Makar, P. A., Stroud, C. A., McLaren, R., Liu, P. S. K., O'Brien, J.,  
594 Mittermeier, R. L., Zhang, J., Marson, G., Cober, S. G., Wolde, M., and Wentzell, J. J. B.: Differences  
595 between measured and reported volatile organic compound emissions from oil sands facilities in Alberta,  
596 Canada, *P. Natl. Acad. Sci. USA*, 114, E3756-E3765, <https://doi.org/10.1073/pnas.1617862114>, 2017.

597 Liggio, J., Stroud, C. A., Wentzell, J. J. B., Zhang, J., Sommers, J., Darlington, A., Liu, P. S. K., Moussa,  
598 S. G., Leithead, A., Hayden, K., Mittermeier, R. L., Staebler, R., Wolde, M., and Li, S.-M.: Quantifying  
599 the Primary Emissions and Photochemical Formation of Isocyanic Acid Downwind of Oil Sands  
600 Operations, *Environmental Science & Technology*, 51, 14462-14471, 10.1021/acs.est.7b04346, 2017.

601 McGee, T.K.: Evacuating First Nations during wildfires in Canada, *Fire Safety Journ.*, 120,  
602 <https://doi.org/10.1016/j.firesaf.2020.103120>, 2020.

603 McLagan, D. S., Stupple, G. W., Darlington, A., Hayden, K., and Steffen, A.: Where there is smoke there  
604 is mercury: Assessing boreal forest fire mercury emissions using aircraft and highlighting uncertainties  
605 associated with upscaling emissions estimates, *Atmos. Chem. Phys.*, 21, 5635-5653,  
606 <https://doi.org/10.5194/acp-21-5635-2021>, 2021.

607 Middlebrook, A. M., Bahreini, R., Jimenez, J. L., and Canagaratna, M. R.: Evaluation of composition-  
608 dependent collection efficiencies for the aerodyne aerosol mass spectrometer using field data, *Aerosol*  
609 *Sci. Tech.*, 46, 258-271, <https://doi.org/10.1080/02786826.2011.620041>, 2012.

610 Mungall, E. L., Abbatt, J. P. D., Wentzell, J. J. B., Lee, A. K. Y., Thomas, J. L., Blais, M., Gosselin, M.,  
611 Miller, L. A., Papakyriakou, T., Willis, M. D., and Liggio, J.: Microlayer source of oxygenated volatile  
612 organic compounds in the summertime marine Arctic boundary layer, *Proceedings of the National*  
613 *Academy of Sciences of the United States of America*, 114, 6203-6208, 10.1073/pnas.1620571114, 2017.

614 Neuman, J. A., Huey, L. G., Ryerson, T. B., and Fahey, D. W.: Study of Inlet Materials for Sampling  
615 Atmospheric Nitric Acid, *Environmental Science & Technology*, 33, 1133-1136, 10.1021/es980767f,  
616 1999.

617 Penkett, S., Gilge, S., Plass-Duelmer, C., Galbally, I., Brough, N., Bottenheim, J., Flocke, F., Gerwig, H.,  
618 Lee, J., Milton, M., Rohrer, F., Ryerson, T., Steinbacher, M., Torseth, K., and Wielgosz, R.: WMO/GAW

619 expert workshop on global long-term measurements of nitrogen oxides and recommendations for GAW  
620 nitrogen oxides network, World Meteorological Organization, Hohenpeissenberg, Germany, 2011.  
621

622 Permar, W., Wang, Q., Selimovic, V., Wielgasz, C., Yokelson, R. J., Hornbrook, R. S., Hills, A. J., Apel,  
623 E. C., Ku, I.-T., Zhou, Y., Sive, B. C., Sullivan, A. P., Collett Jr, J. L., Campos, T. L., Palm, B. B., Peng,  
624 Q., Thornton, J. A., Garofalo, L. A., Farmer, D. K., Kreidenweis, S. M., Levin, E. J. T., DeMott, P. J.,  
625 Flocke, F., Fischer, E. V., and Hu, L.: Emissions of trace organic gases from western U.S. wildfires based  
626 on WE-CAN aircraft measurements, *J. Geophys. Res.-Atmos*, 126, e2020JD033838,  
627 <https://doi.org/10.1029/2020JD033838>, 2021.

628 Quinn, P. K., Bates, T. S., Coffman, D., Onasch, T. B., Worsnop, D., Baynard, T., de Gouw, J. A.,  
629 Goldan, P. D., Kuster, W. C., Williams, E., Roberts, J. M., Lerner, B., Stohl, A., Pettersson, A., and  
630 Lovejoy, E. R.: Impacts of sources and aging on submicrometer aerosol properties in the marine boundary  
631 layer across the Gulf of Maine, *J. Geophys. Res.-Atmos*, 111, D23S36,  
632 <https://doi.org/10.1029/2006JD007582>, 2006.

633 Ridley, B. A. and Grahek, F. E.: A small, low flow, high sensitivity reaction vessel for NO  
634 chemiluminescence detectors, *J. Atmos. Ocean. Tech.*, 7, 307-311, [https://doi.org/10.1175/1520-  
635 0426\(1990\)007<0307:Aslfhs>2.0.Co;2](https://doi.org/10.1175/1520-0426(1990)007<0307:Aslfhs>2.0.Co;2), 1990.

636 Roberts, J. M., Veres, P., Warneke, C., Neuman, J. A., Washenfelder, R. A., Brown, S. S., Baasandorj,  
637 M., Burkholder, J. B., Burling, I. R., Johnson, T. J., Yokelson, R. J., and De Gouw, J.: Measurement of  
638 HONO, HNCO, and other inorganic acids by negative-ion proton-transfer chemical-ionization mass  
639 spectrometry (NI-PT-CIMS): Application to biomass burning emissions, *Atmospheric Measurement  
640 Techniques*, 3, 981-990, 10.5194/amt-3-981-2010.

641 Schwarz, J. P., Gao, R. S., Fahey, D. W., Thomson, D. S., Watts, L. A., Wilson, J. C., Reeves, J. M.,  
642 Darbeheshti, M., Baumgardner, D. G., Kok, G. L., Chung, S. H., Schulz, M., Hendricks, J., Lauer, A.,  
643 Kärcher, B., Slowik, J. G., Rosenlof, K. H., Thompson, T. L., Langford, A. O., Loewenstein, M., and  
644 Aikin, K. C.: Single-particle measurements of midlatitude black carbon and light-scattering aerosols from  
645 the boundary layer to the lower stratosphere, *J. Geophys. Res.-Atmos*, 111, D16207,  
646 <https://doi.org/10.1029/2006JD007076>, 2006.

647 Sekimoto, K., Li, S.-M., Yuan, B., Koss, A., Coggon, M., Warneke, C., and de Gouw, J.: Calculation of  
648 the sensitivity of proton-transfer-reaction mass spectrometry (PTR-MS) for organic trace gases using  
649 molecular properties, *Int. J. Mass Spectrom.*, 421, 71-94, <https://doi.org/10.1016/j.ijms.2017.04.006>,  
650 2017.

651 Selimovic, V., Yokelson, R. J., McMeeking, G. R., and Coe field, S.: In situ measurements of trace gases,  
652 PM, and aerosol optical properties during the 2017 NW US wildfire smoke event, *Atmos. Chem. Phys.*,  
653 19, 3905-3926, <https://doi.org/10.5194/acp-19-3905-2019>, 2019.

654 Sheu, R., Marcotte, A., Khare, P., Charan, S., Ditto, J. C., and Gentner, D. R.: Advances in offline  
655 approaches for chemically speciated measurements of trace gas-phase organic compounds via adsorbent  
656 tubes in an integrated sampling-to-analysis system, *J. Chromatogr. A*, 1575, 80-  
657 90, <https://doi.org/10.1016/j.chroma.2018.09.014>, 2018.

658 Stecher III, H. A., Luther III, G. W., MacTaggart, D. L., Farwell, S. O., Crosley, D. R., Dorko, W. D.,  
659 Goldan, P. D., Beltz, N., Krischke, U., Luke, W. T., Thornton, D. C., Talbot, R. W., Lefer, B. L., Scheuer,  
660 E. M., Benner, R. L., Wu, J., Saltzman, E. S., Gallagher, M. S., and Ferek, R. J.: Results of the Gas-Phase

661 Sulfur Intercomparison Experiment (GASIE): Overview of experimental setup, results and general  
662 conclusions, *J. Geophys. Res.-Atmos*, 102, 16219-16236, <https://doi.org/10.1029/97JD01362>, 1997.

663 Stephens, M., Turner, N., and Sandberg, J.: Particle identification by laser-induced incandescence in a  
664 solid-state laser cavity, *Appl. Optics*, 42, 3726-3736, <https://doi.org/10.1364/ao.42.003726>, 2003.

665 Stockwell, C. E., Kupc, A., Witkowski, B., Talukdar, R. K., Liu, Y., Selimovic, V., Zarzana, K. J.,  
666 Sekimoto, K., Warneke, C., Washenfelder, R. A., Yokelson, R. J., Middlebrook, A. M., and Roberts, J.  
667 M.: Characterization of a catalyst-based conversion technique to measure total particulate nitrogen and  
668 organic carbon and comparison to a particle mass measurement instrument, *Atmos. Meas. Tech.*, 11,  
669 2749-2768, 10.5194/amt-11-2749-2018, 2018.

670 Veres, P. R., and Roberts, J. M.: Development of a photochemical source for the production and  
671 calibration of acyl peroxy nitrates, *Atmos. Meas. Tech.*, 8, 2225-2231, 10.5194/amt-8-2225-  
672 2015, 2015.

673 Veres, P., Roberts, J. M., Burling, I. R., Warneke, C., de Gouw, J., and Yokelson, R. J.: Measurements of  
674 gas-phase inorganic and organic acids from biomass fires by negative-ion proton-transfer chemical-  
675 ionization mass spectrometry, *J. Geophys. Res.-Atmos*, 115, D23302,  
676 <https://doi.org/10.1029/2010JD014033>, 2010.

677 Ward, D. E. and Radke, L. F.: Emissions measurements from vegetation fires: A comparative evaluation  
678 of methods and results, in: *Fire in the Environment: The Ecological, Atmospheric, and Climatic*  
679 *Importance of Vegetation Fires*. Dahlem Workshop Reports: Environmental Sciences Research Report  
680 13, edited by: Crutzen, P. J., and Goldammer, J. G., John Wiley & Sons, Chichester, England, 53-76,  
681 1993.

682 Williams, E. J., Baumann, K., Roberts, J. M., Bertman, S. B., Norton, R. B., Fehsenfeld, F. C.,  
683 Springston, S. R., Nunnermacker, L. J., Newman, L., Olszyna, K., Meagher, J., Hartsell, B., Edgerton, E.,  
684 Pearson, J. R., and Rodgers, M. O.: Intercomparison of ground-based NO<sub>y</sub> measurement techniques, *J.*  
685 *Geophys. Res.-Atmos*, 103, 22261-22280, <https://doi.org/10.1029/98JD00074>, 1998.

686

687

688

689
